# Supplementary material for: A Facile One-Pot Synthesis of New Poly Functionalized Pyrrolotriazoles via a Regioselective Multicomponent Cyclisation and Suzuki–Miyaura Coupling Reactions
Source: MDPI journal article supplement (doi:10.3390/catal12080828), 2022-07-27
Supplement: s1 [file s1]

Supplementary

# A Facile One-Pot Synthesis of New Poly Functionalized Pyrrolotriazoles via a Regioselective Multicomponent Cyclisation and Suzuki–Miyaura Coupling Reactions

Simon Garnier <sup>1,†</sup>, Kévin Brugemann <sup>1,†</sup>, Agnieszka Zak <sup>1</sup>, Johnny Vercouillie <sup>2</sup>, Marie Potier-Cartereau <sup>3</sup>, Mathieu Marchivie <sup>4</sup>, Sylvain Routier <sup>1,\*</sup> and Frédéric Buron <sup>1,\*</sup>

<sup>1</sup> Institut de Chimie Organique et Analytique, ICOA, Université d'Orléans, CNRS UMR 7311, Rue de Chartres, BP 6759, 45067 Orléans, France; simon.garnier@univ-orleans.fr (S.G.); kevin.brugemann@univ-orleans.fr (K.B.); agnieszka.zak@univ-orleans.fr (A.Z.)

<sup>2</sup> iBrain, INSERM, UMR 1253, Université de Tours, 37032 Tours, France; johnny.vercouillie@univ-tours.fr

<sup>3</sup> Nutrition, Croissance et Cancer, N2C, INSERM, UMR 1069, Université de Tours, 37032 Tours, France; marie.potier-cartereau@univ-tours.fr

<sup>4</sup> Univ. Bordeaux, CNRS, Bordeaux INP, ICMCB, UMR 5026, F-33600 Pessac; mathieu.marchivie@icmcb.cnrs.fr

\* Correspondence: sylvain.routier@univ-orleans.fr (S.R.); frederic.buron@univ-orleans.fr (F.B.)

† These authors contributed equally to this work.

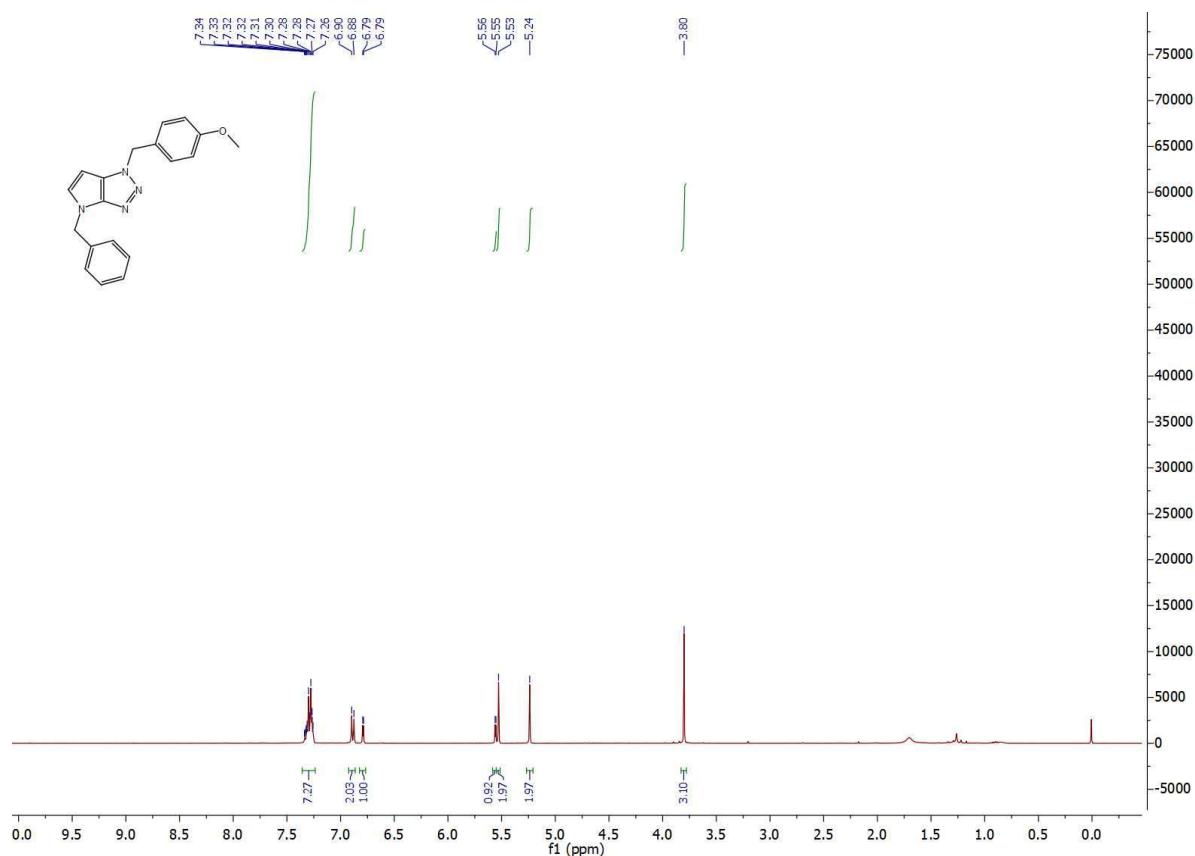

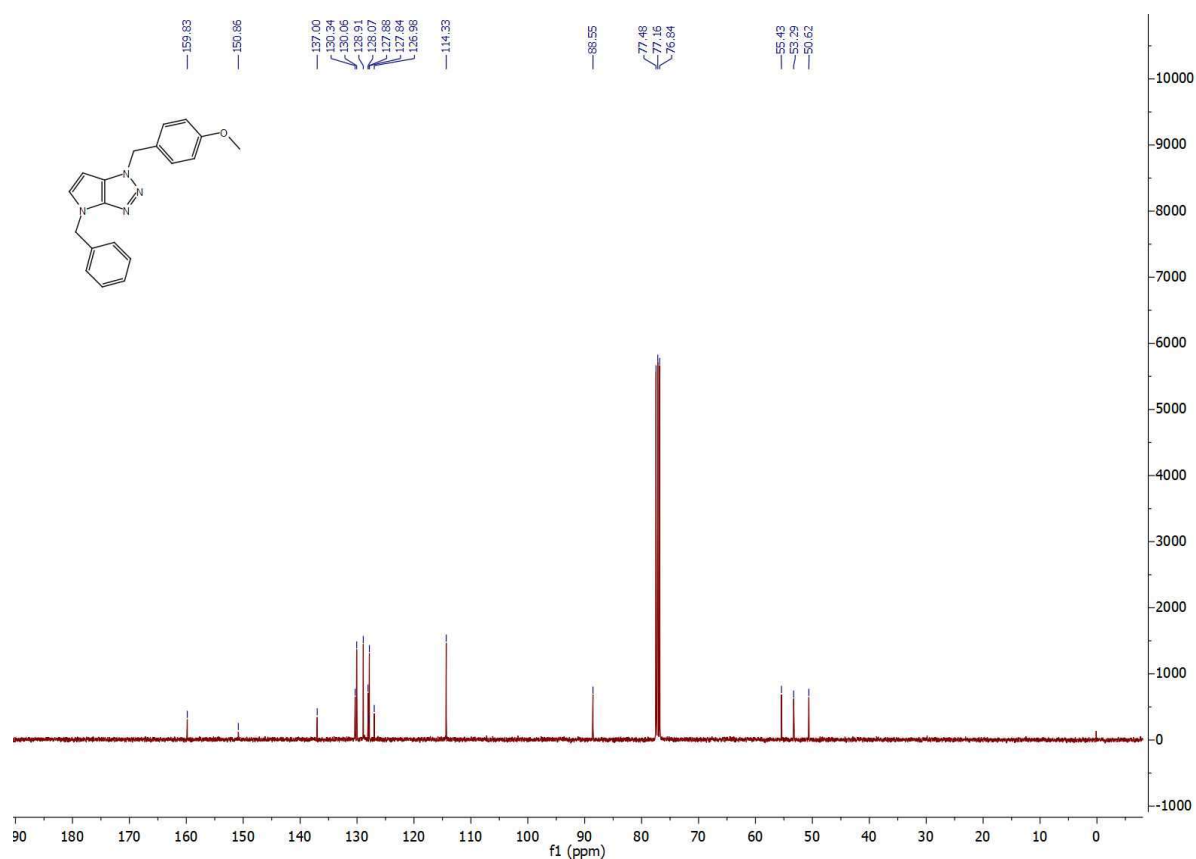

Figure S1. : 4-Benzyl-1-(4-methoxybenzyl)-1,4-dihydropyrrolo[2,3-*d*][1,2,3]triazole (4).

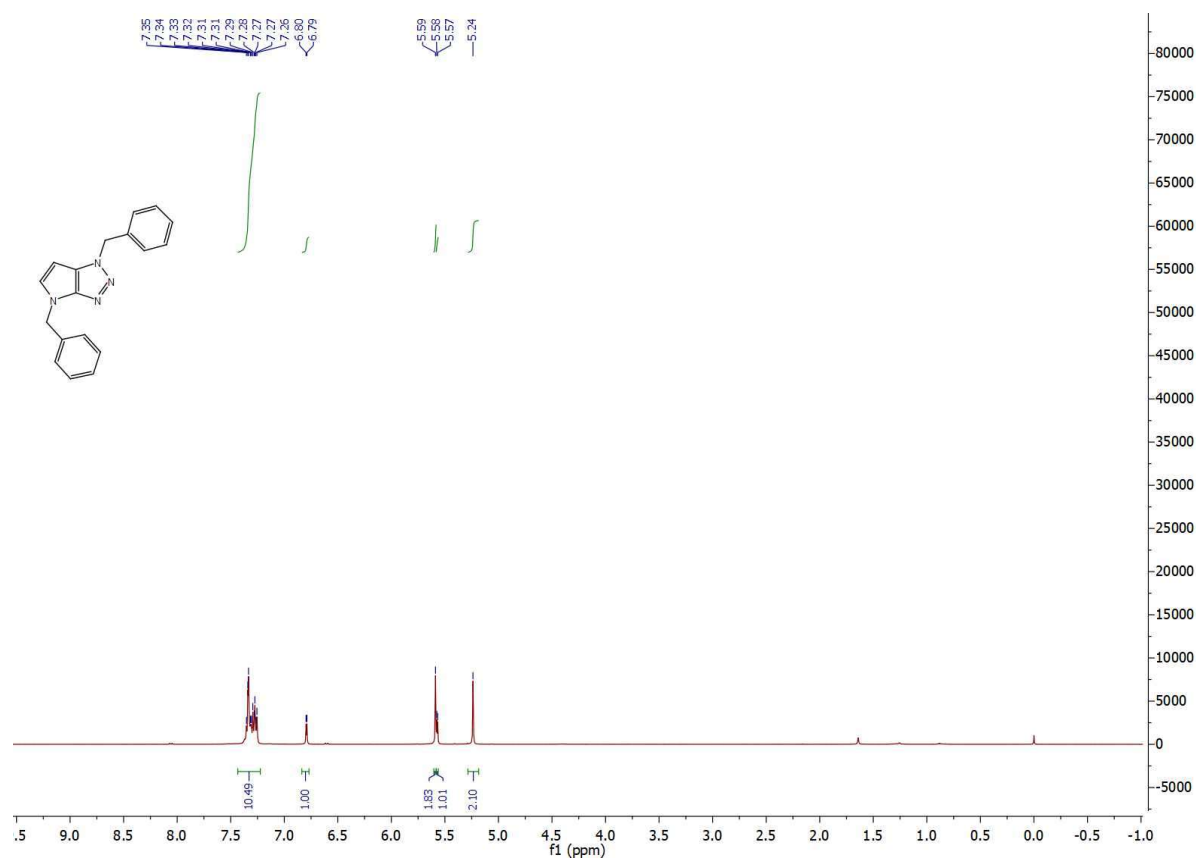

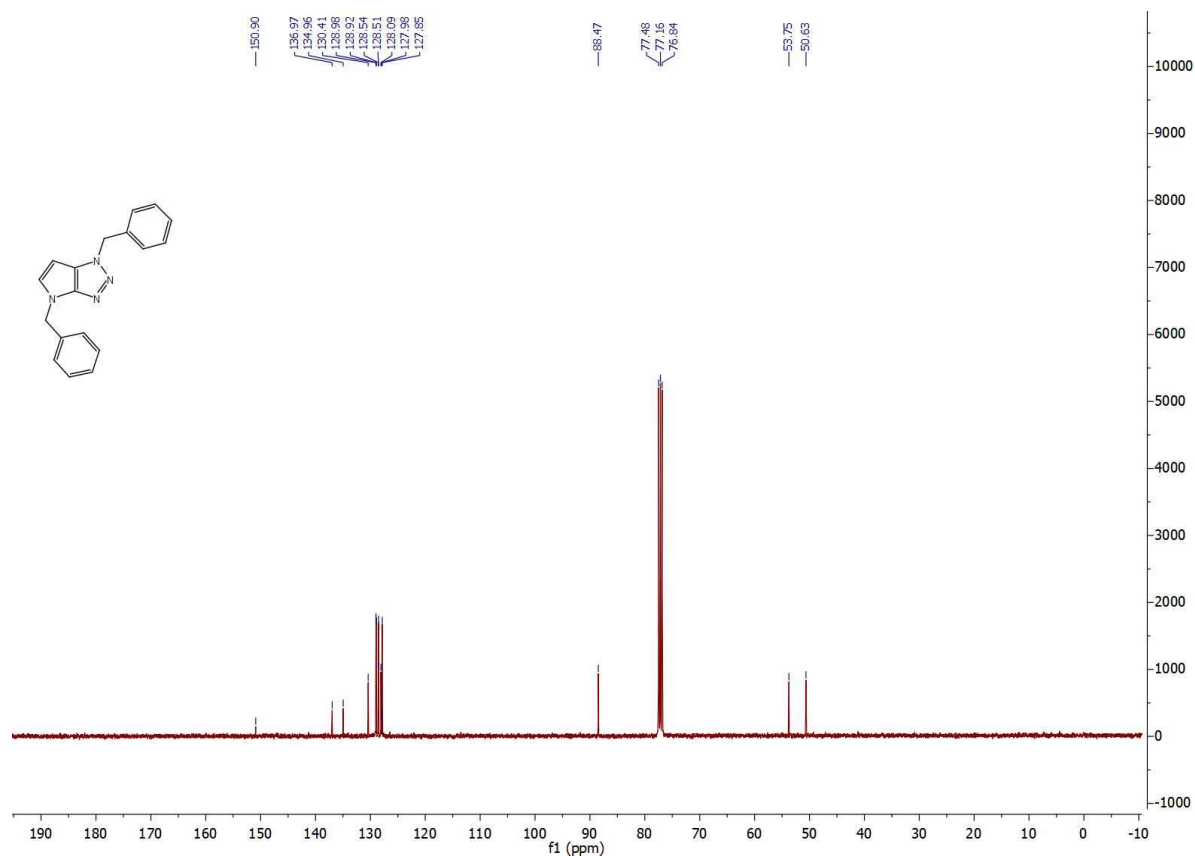

Figure S2. : 1,4-Dibenzyl-1,4-dihydropyrrolo[2,3-d][1,2,3]triazole (5).

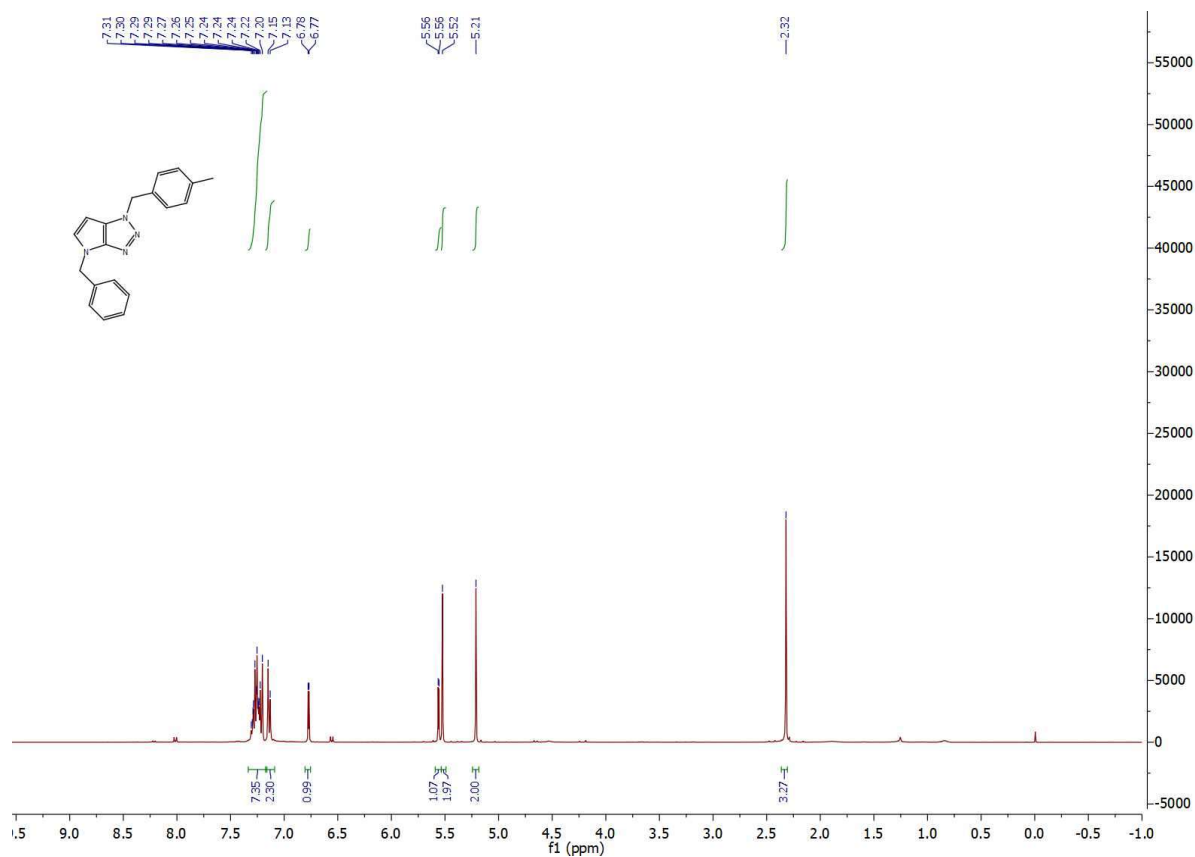

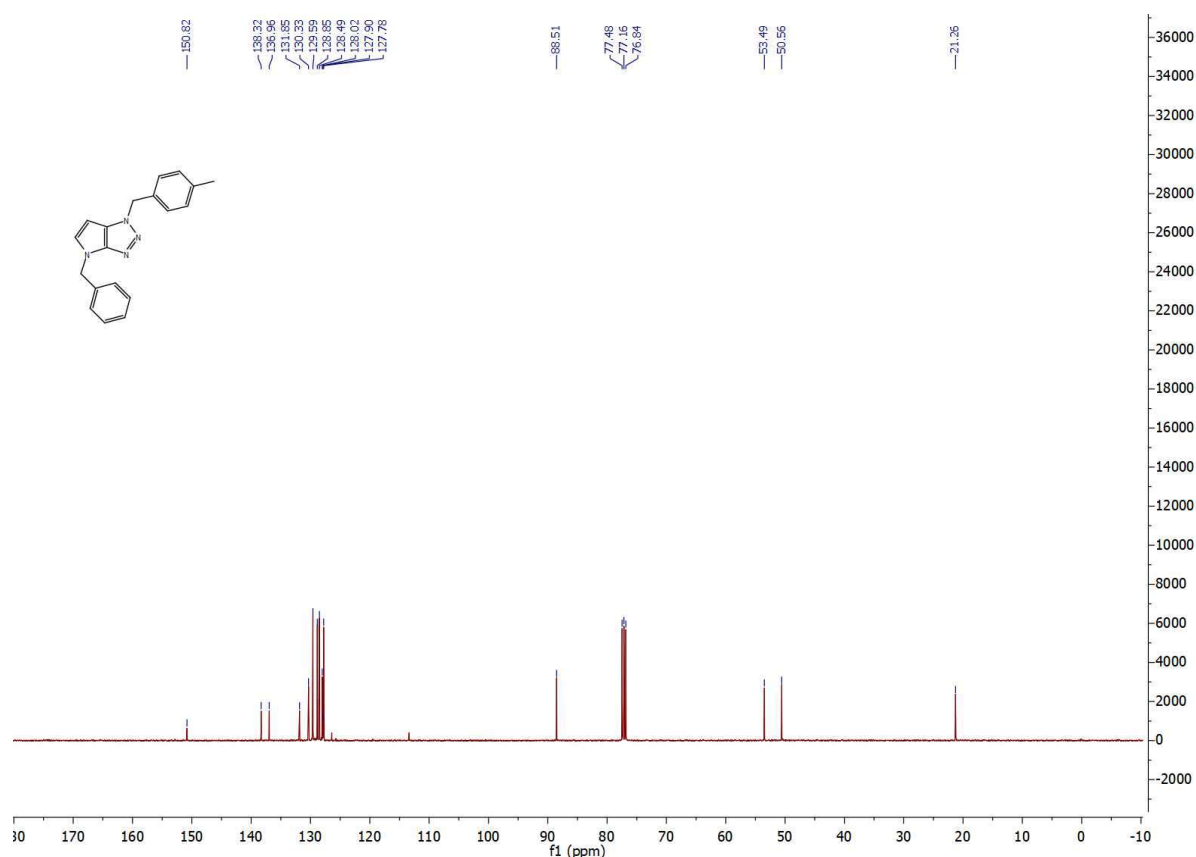

Figure S3. 4-Benzyl-1-(4-methylbenzyl)-1,4-dihydropyrrolo[2,3-d][1,2,3]triazole (6).

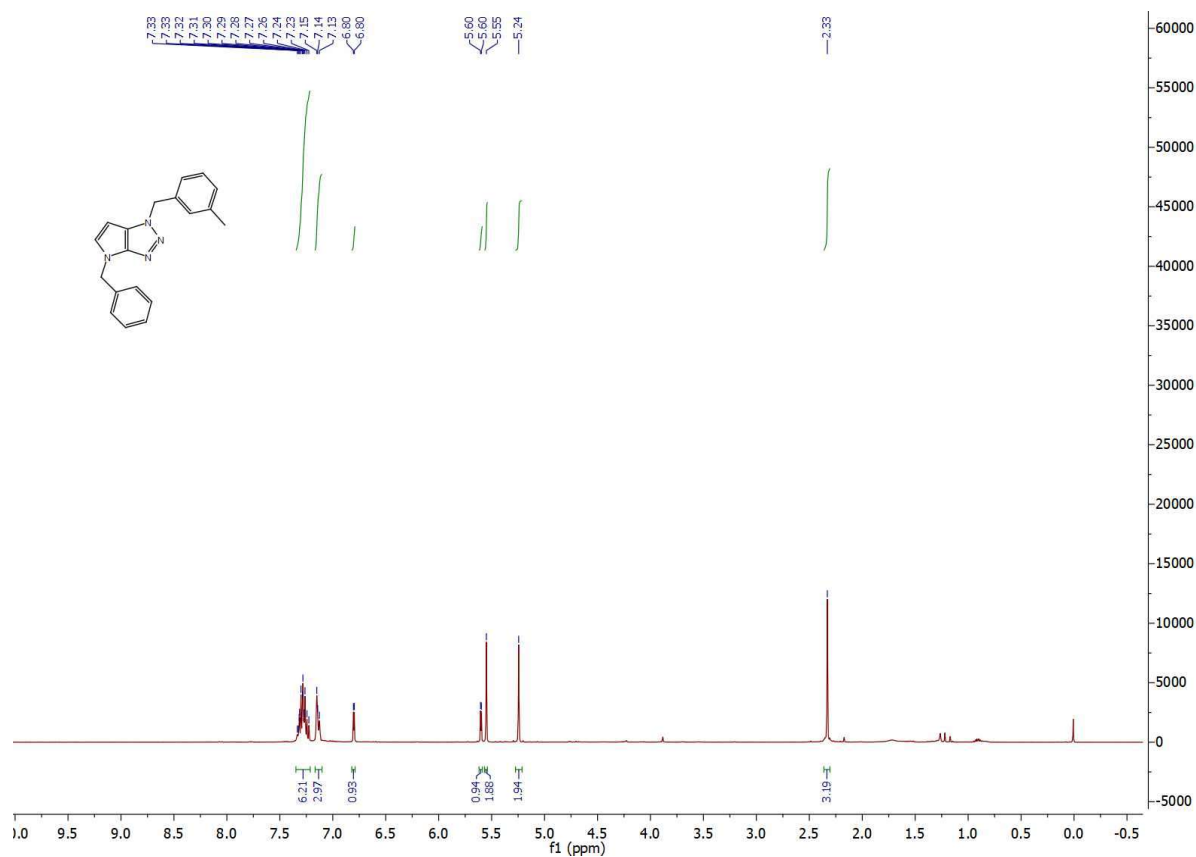

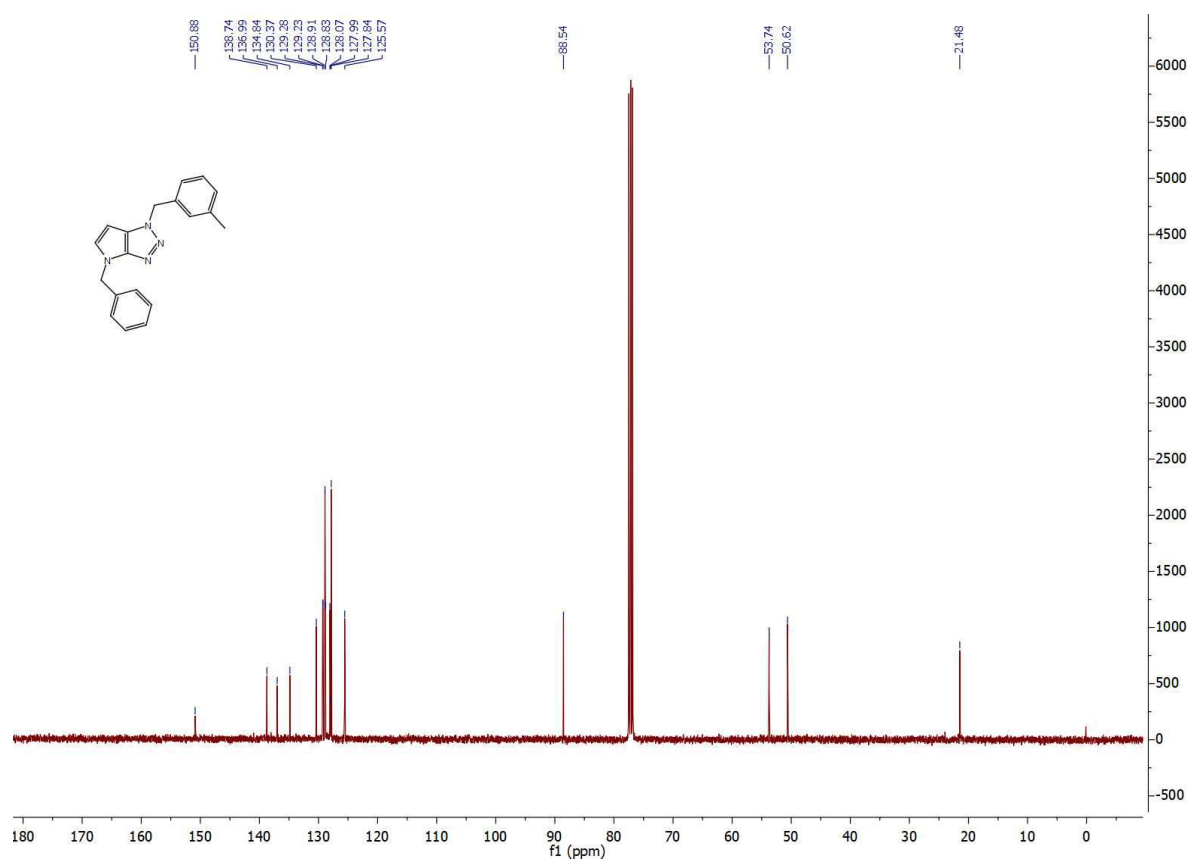

Figure S4. 4-Benzyl-1-(3-methylbenzyl)-1,4-dihydropyrrolo[2,3-*d*][1,2,3]triazole (7).

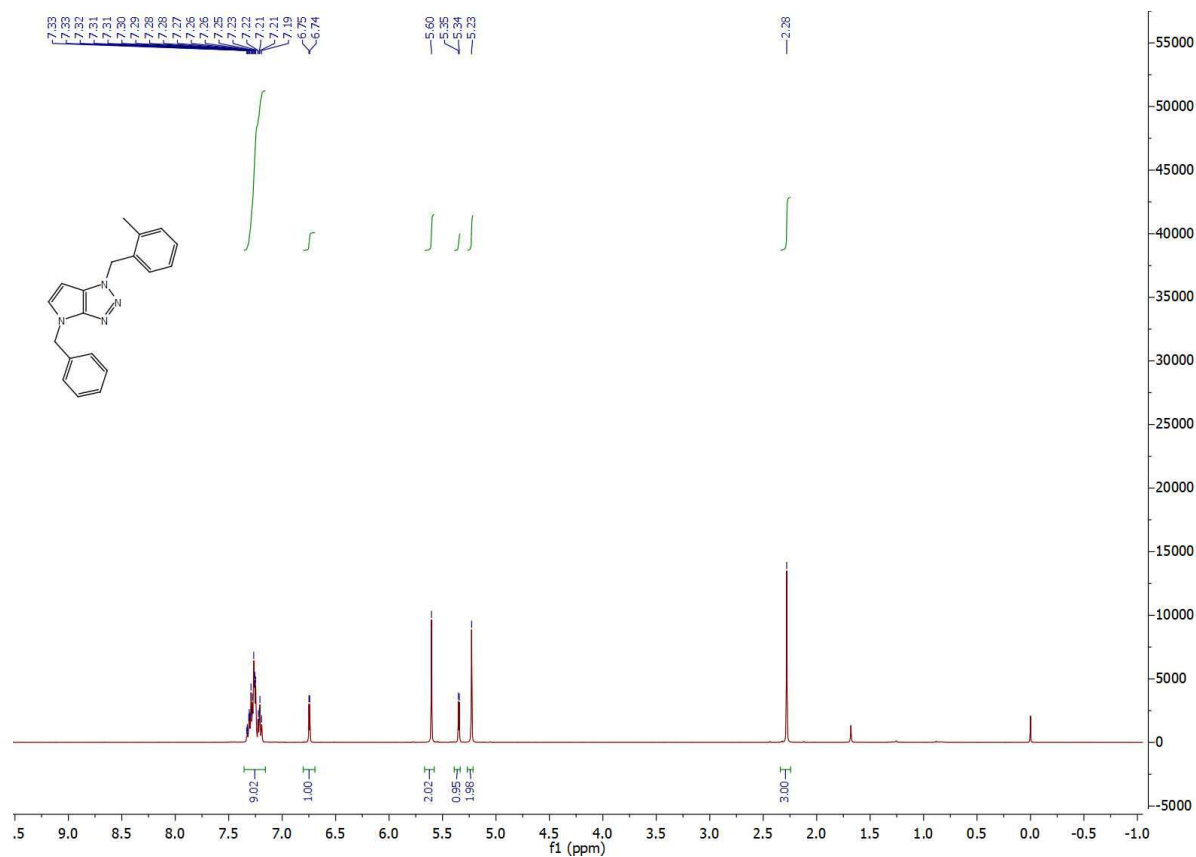

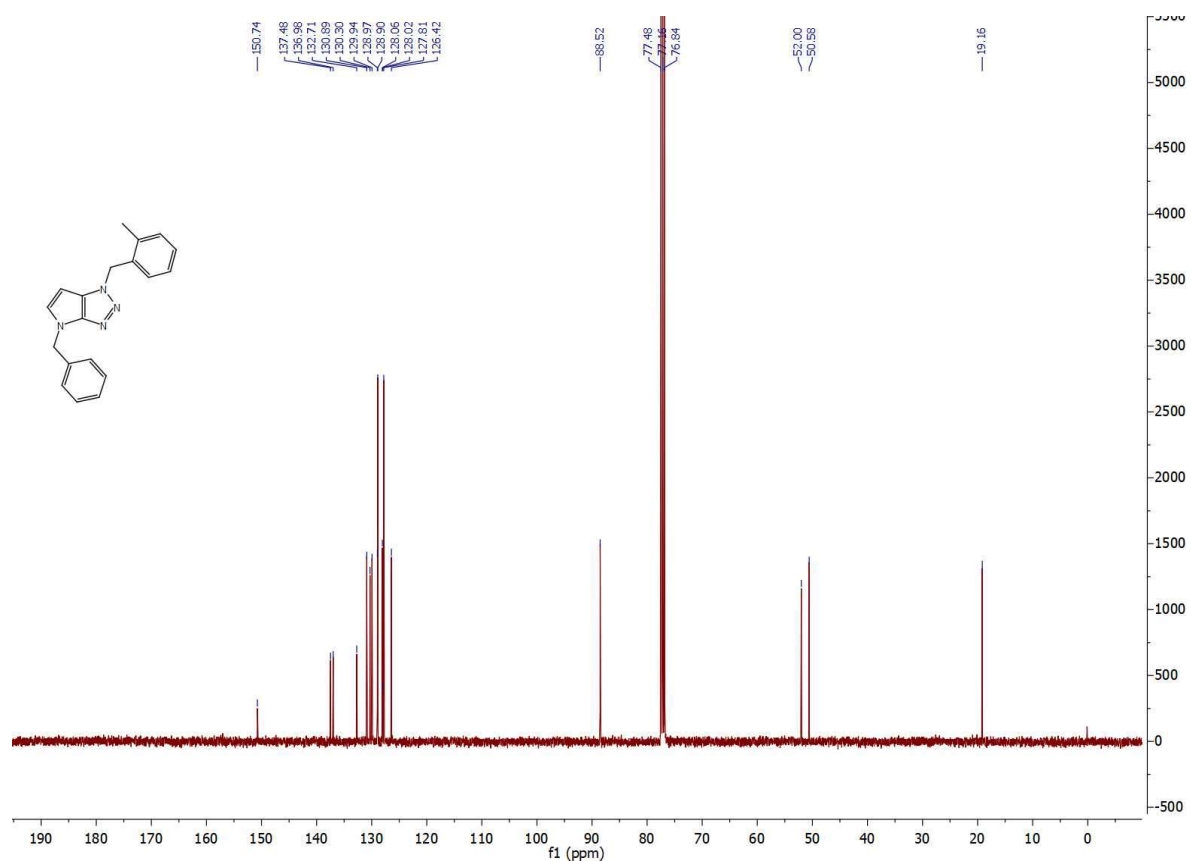

Figure S5. 4-Benzyl-1-(2-methylbenzyl)-1,4-dihydropyrrolo[2,3-d][1,2,3]triazole (8).

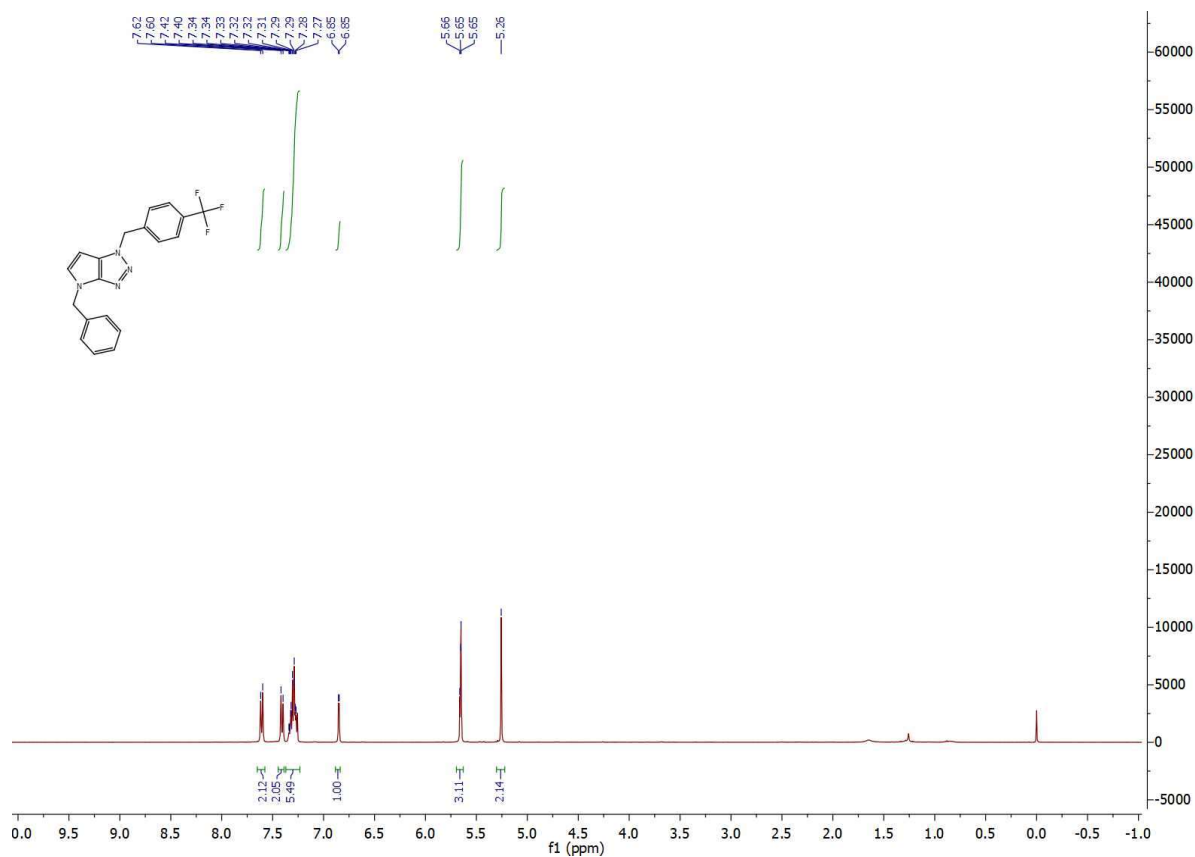

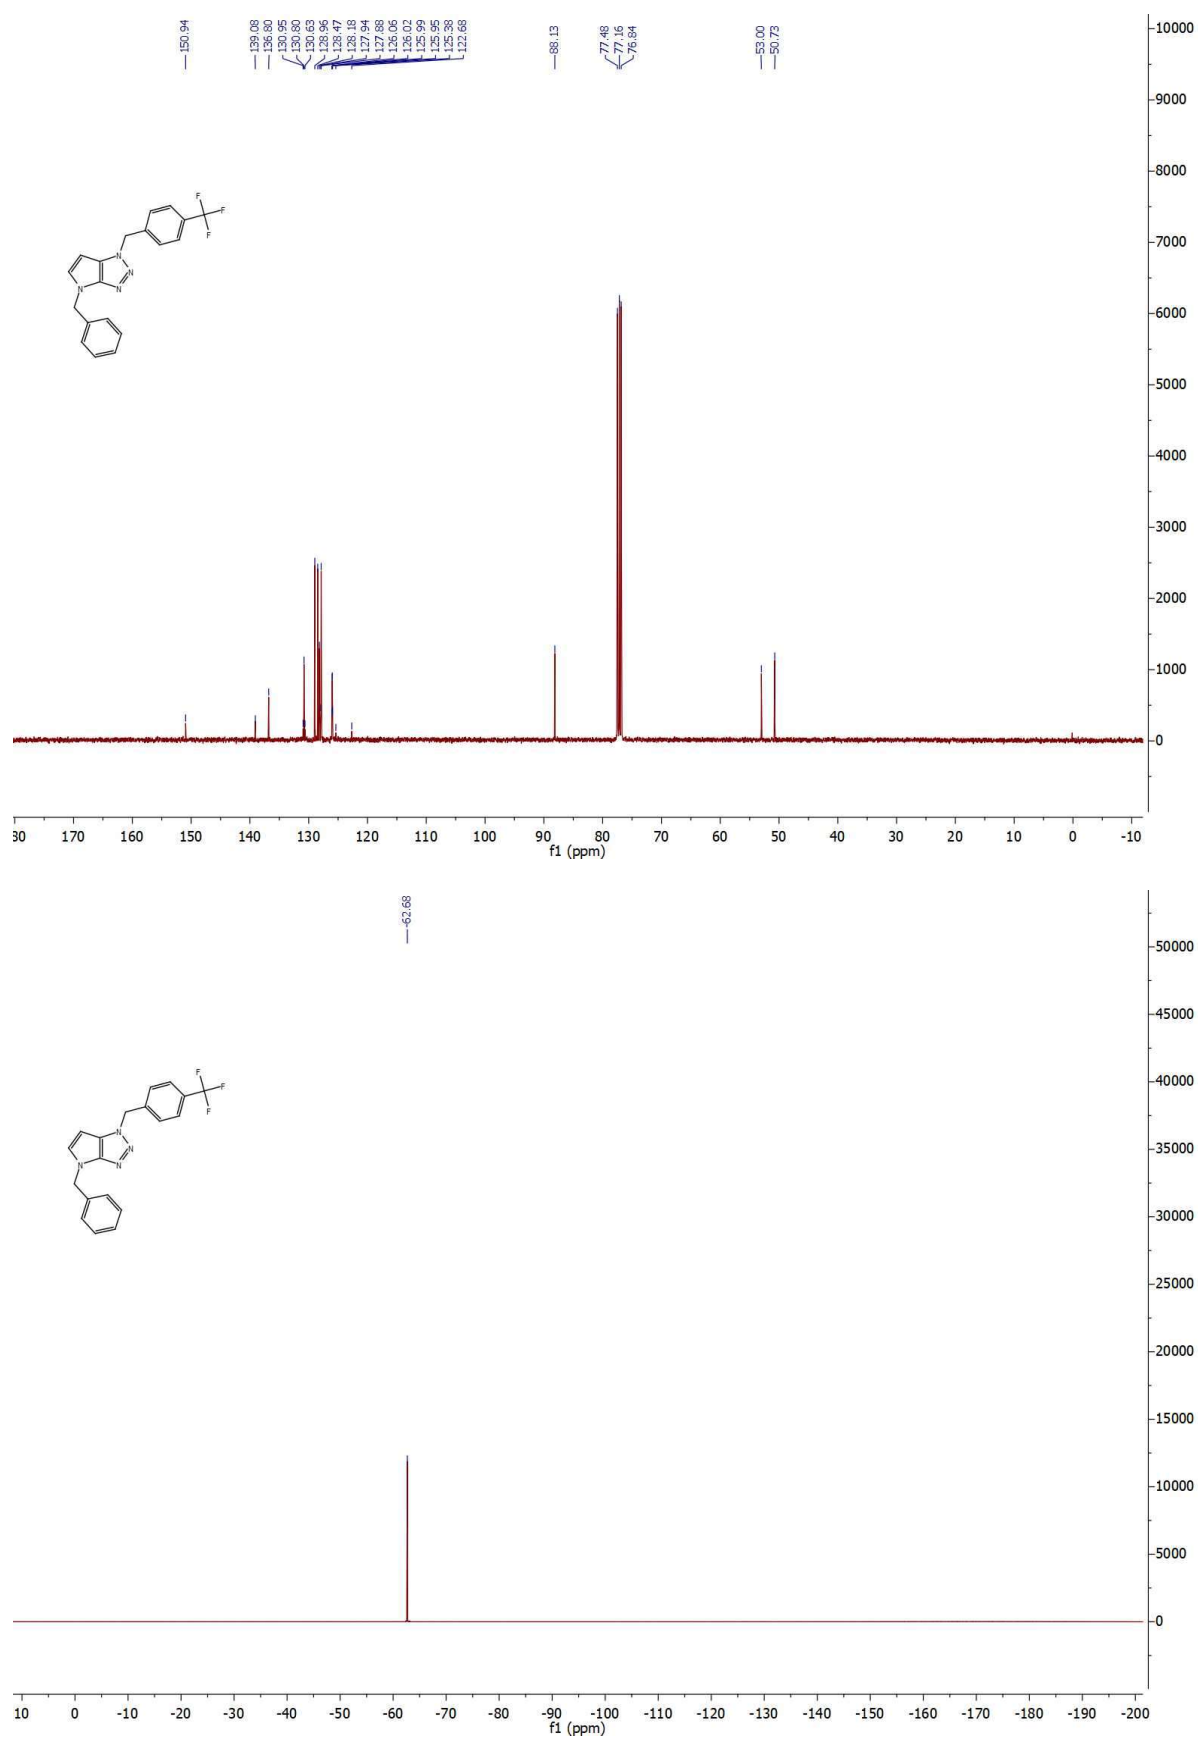

Figure S6. 4-Benzyl-1-(4-(trifluoromethyl)benzyl)-1,4-dihydropyrrolo[2,3-d][1,2,3]triazole (9).

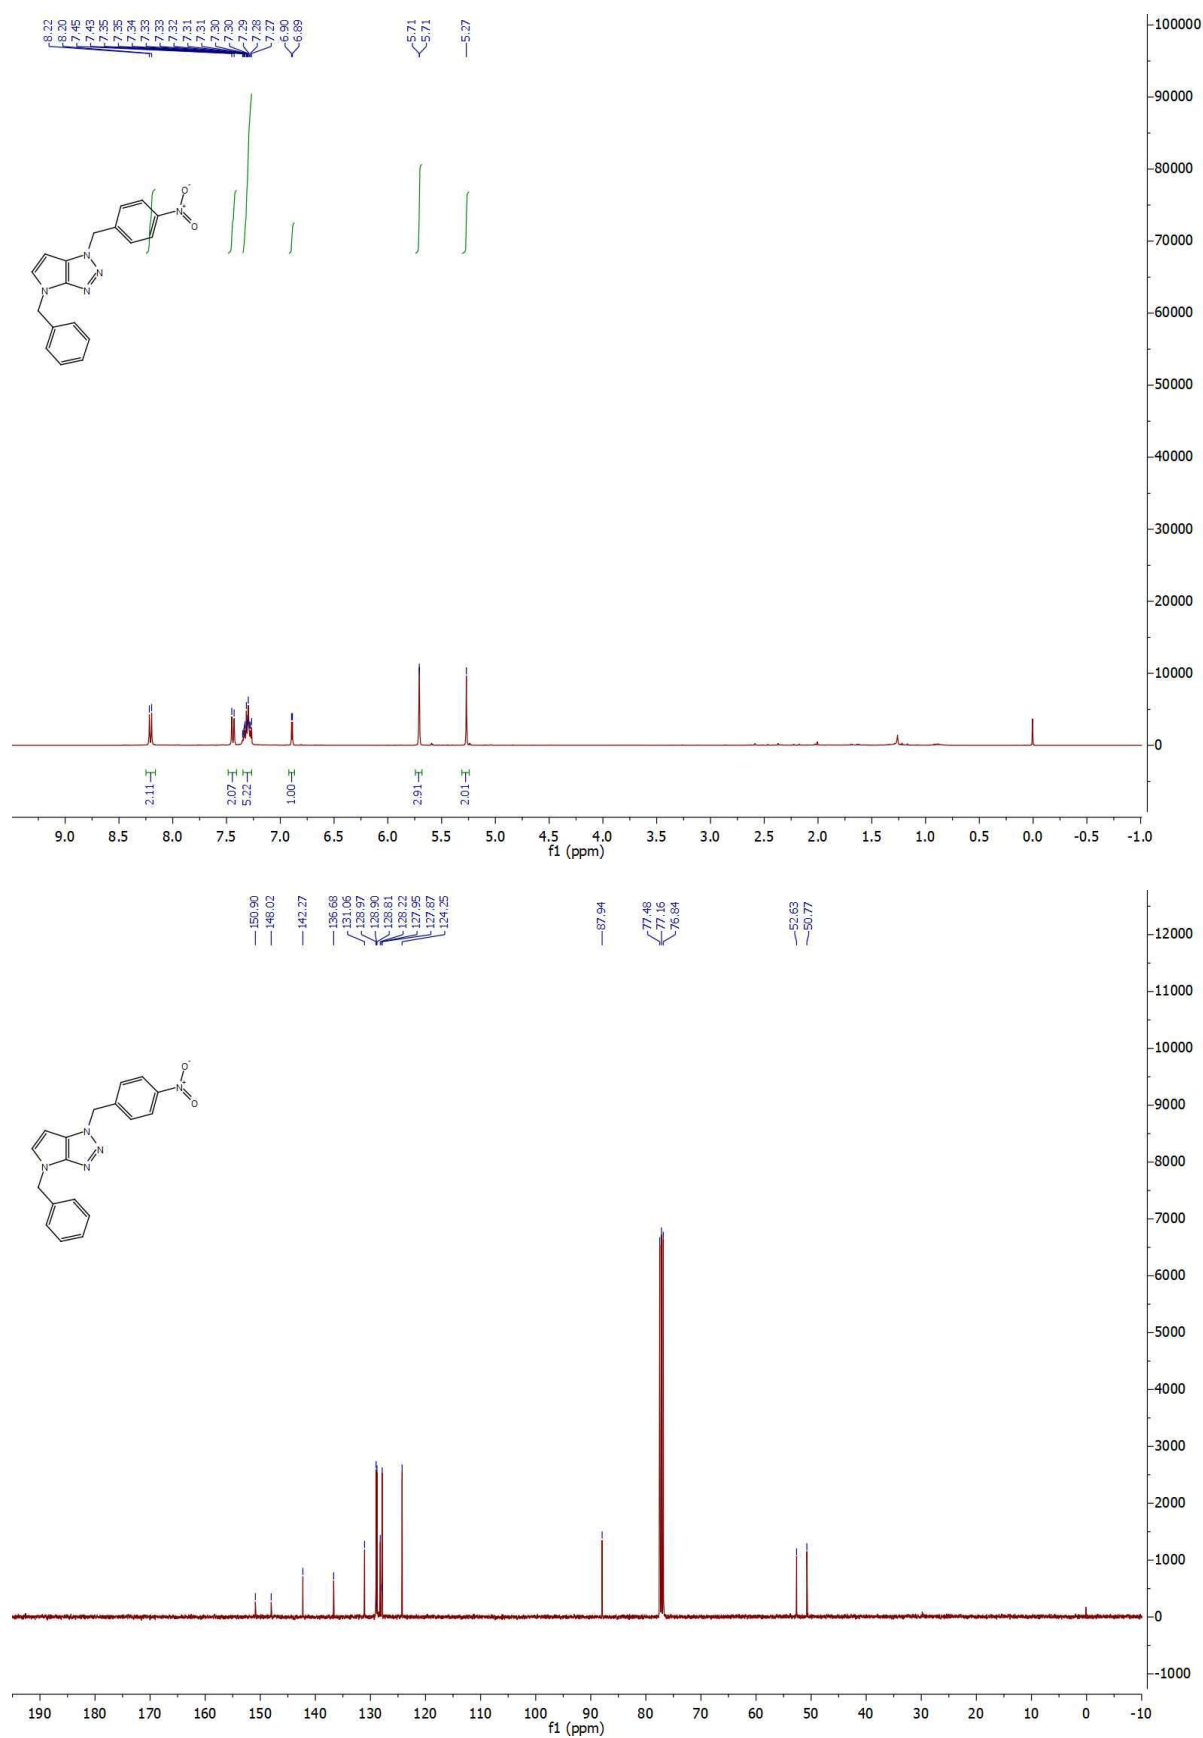

Figure S7. 4-Benzyl-1-(4-nitrobenzyl)-1,4-dihydropyrrolo[2,3-d][1,2,3]triazole (10).

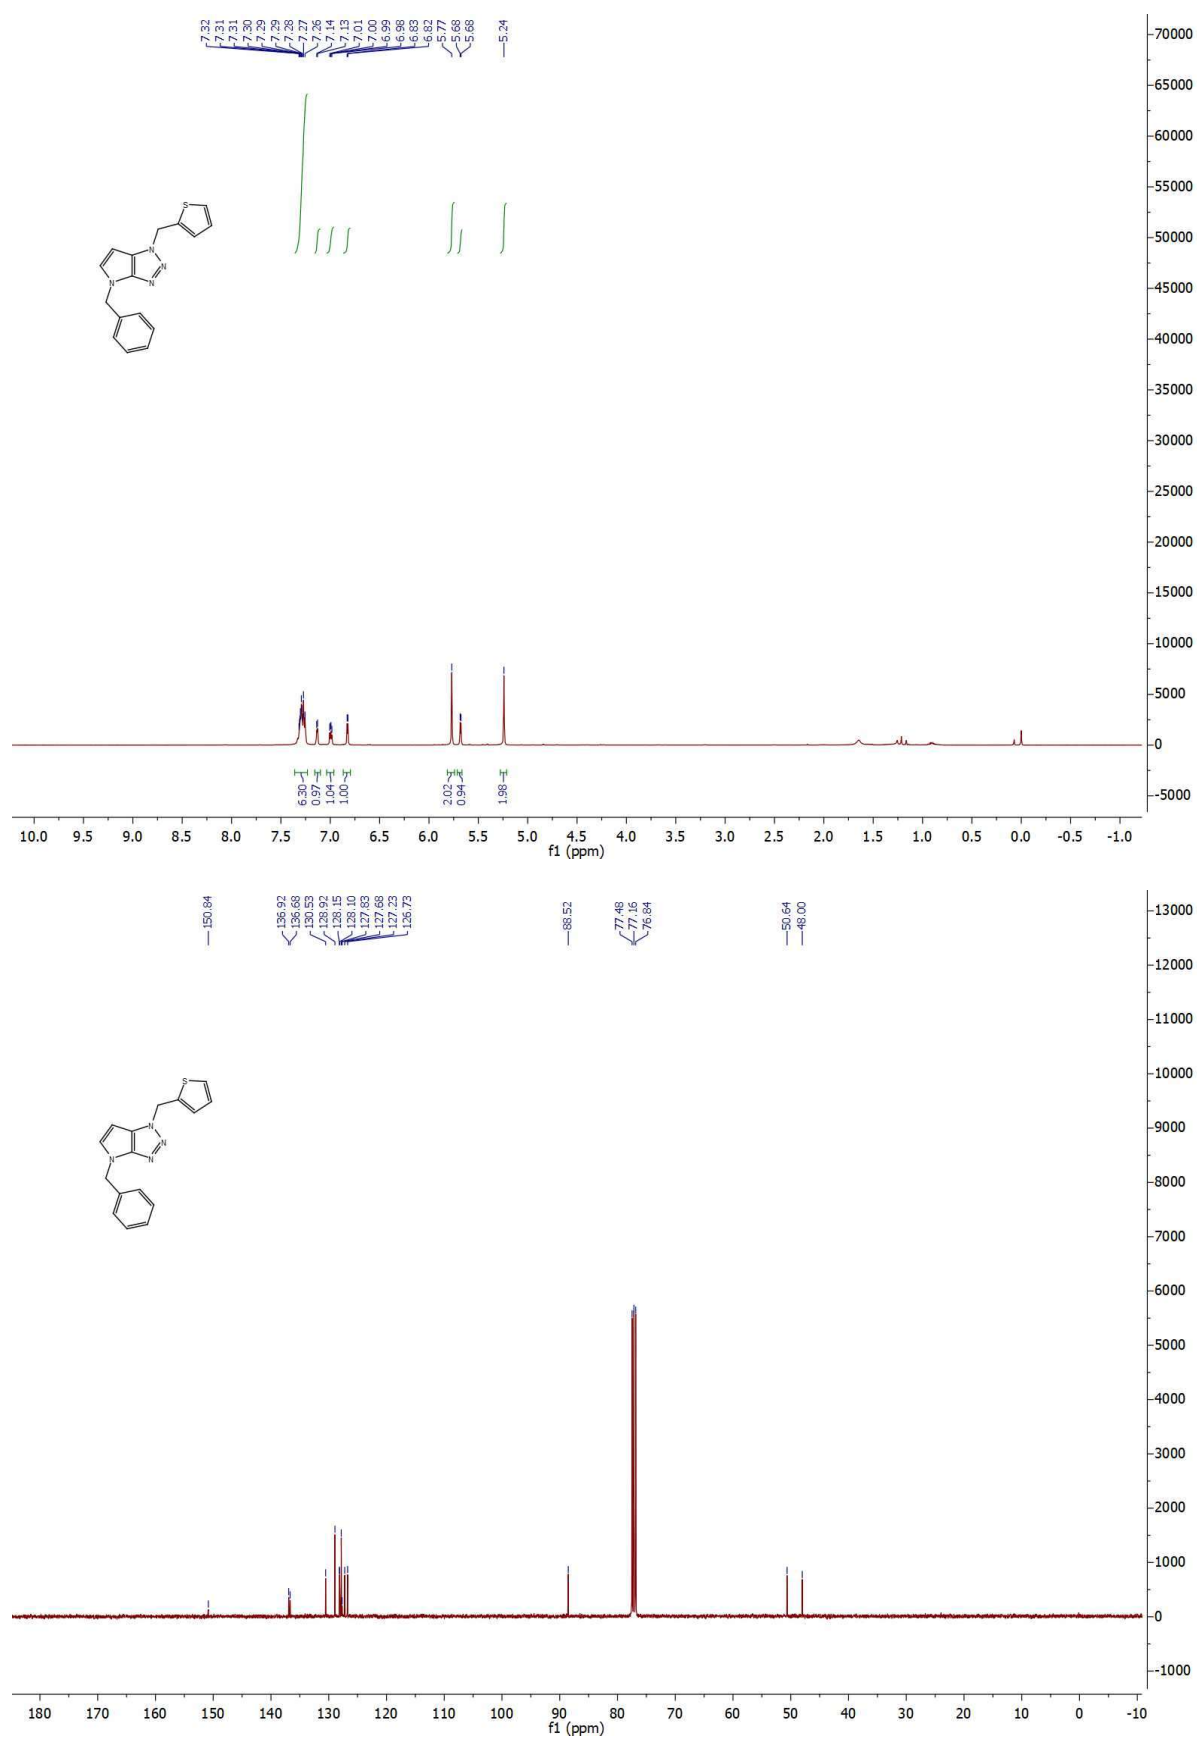

Figure S8. 4-Benzyl-1-(thiophen-2-ylmethyl)-1,4-dihydropyrrolo[2,3-*d*][1,2,3]triazole (11).

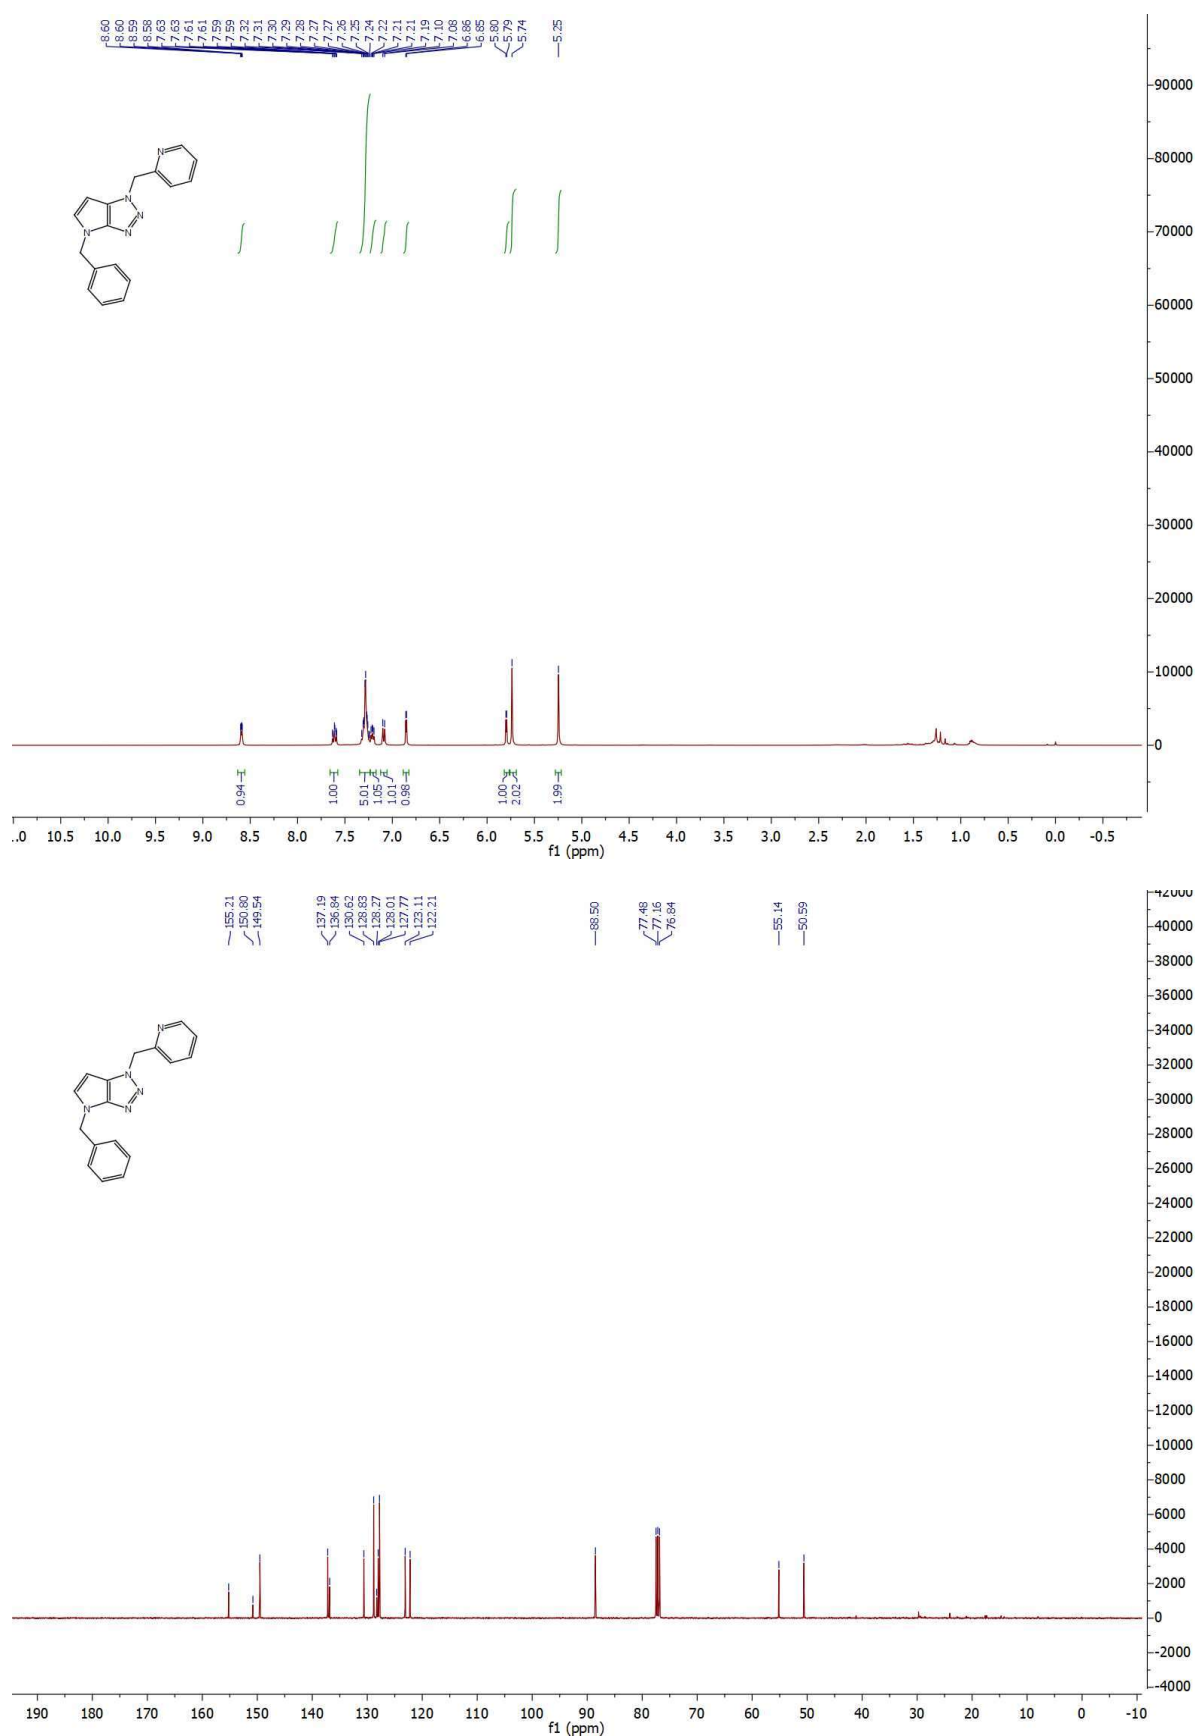

**Figure S9.** 4-Benzyl-1-(pyridin-2-ylmethyl)-1,4-dihydropyrrolo[2,3-*d*][1,2,3]triazole (12).

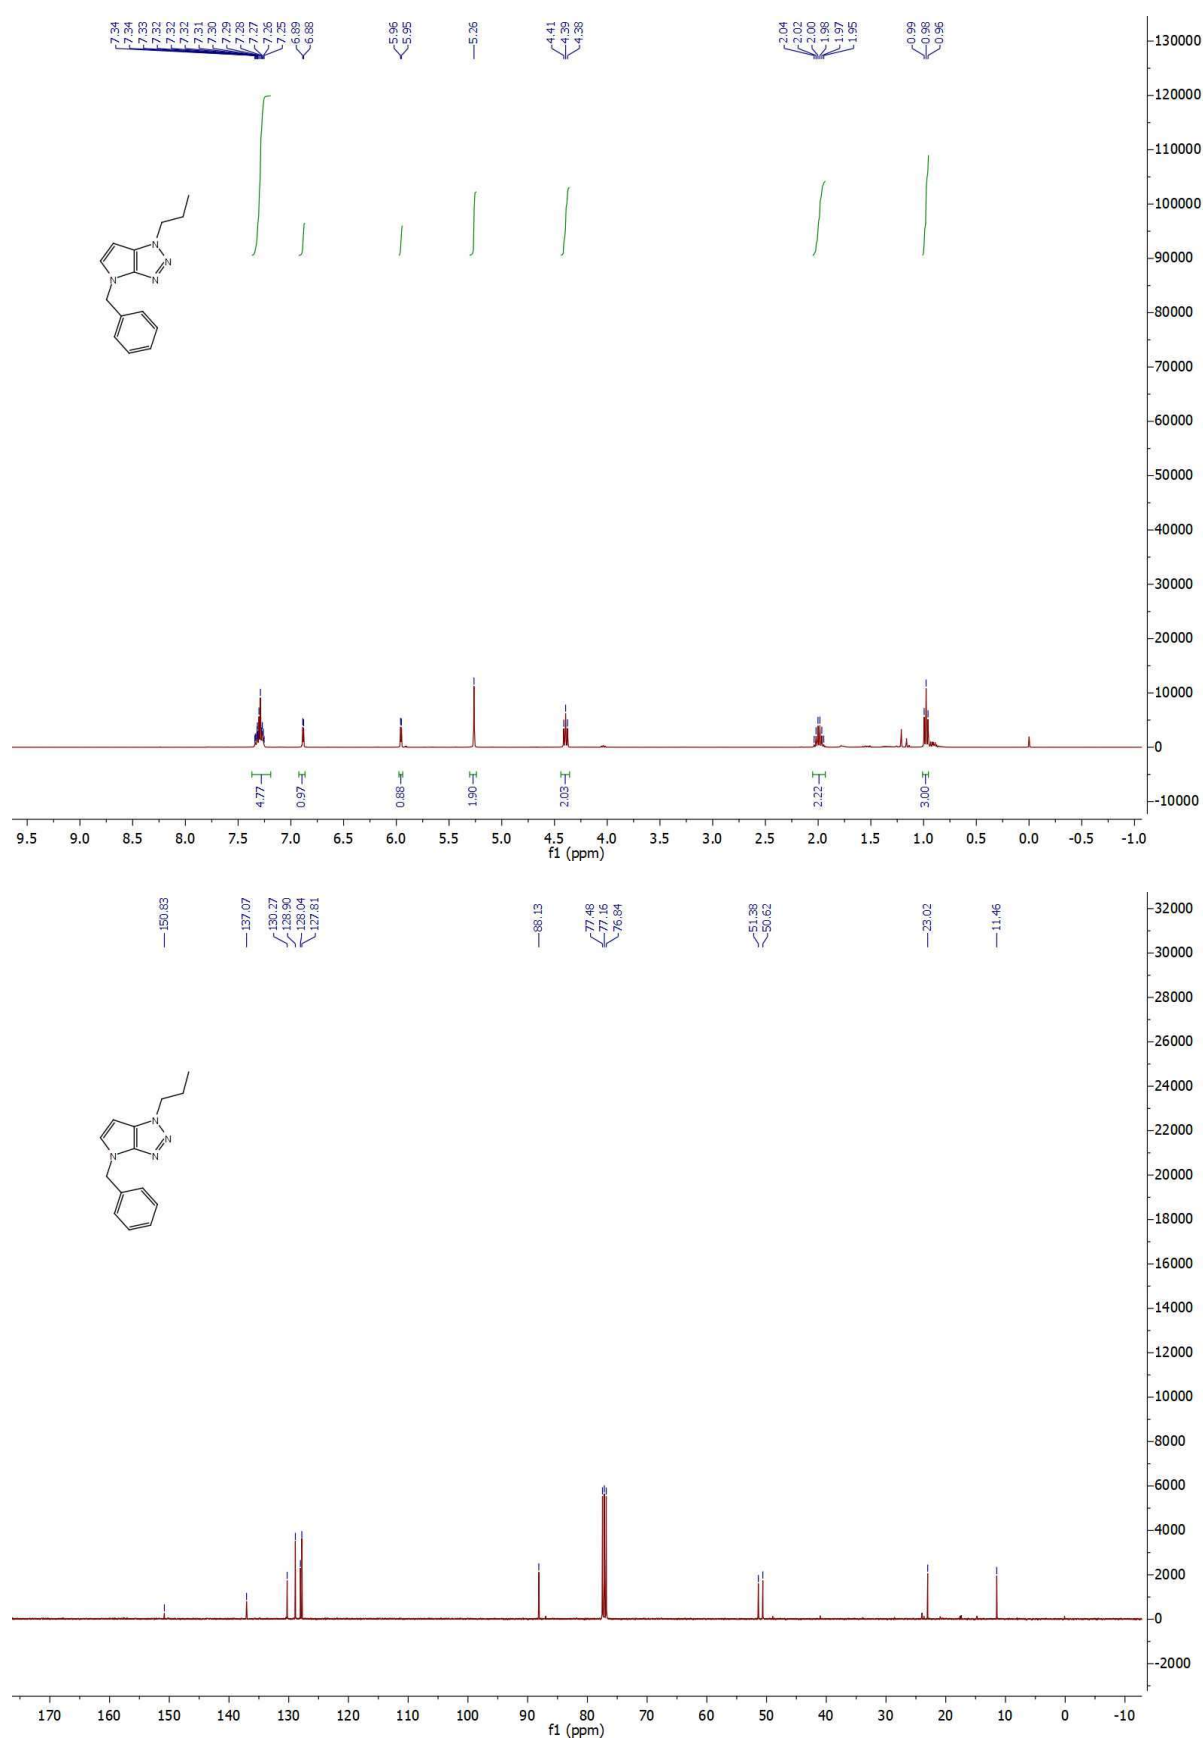

Figure S10. 4-Benzyl-1-propyl-1,4-dihydropyrrolo[2,3-d][1,2,3]triazole (14).

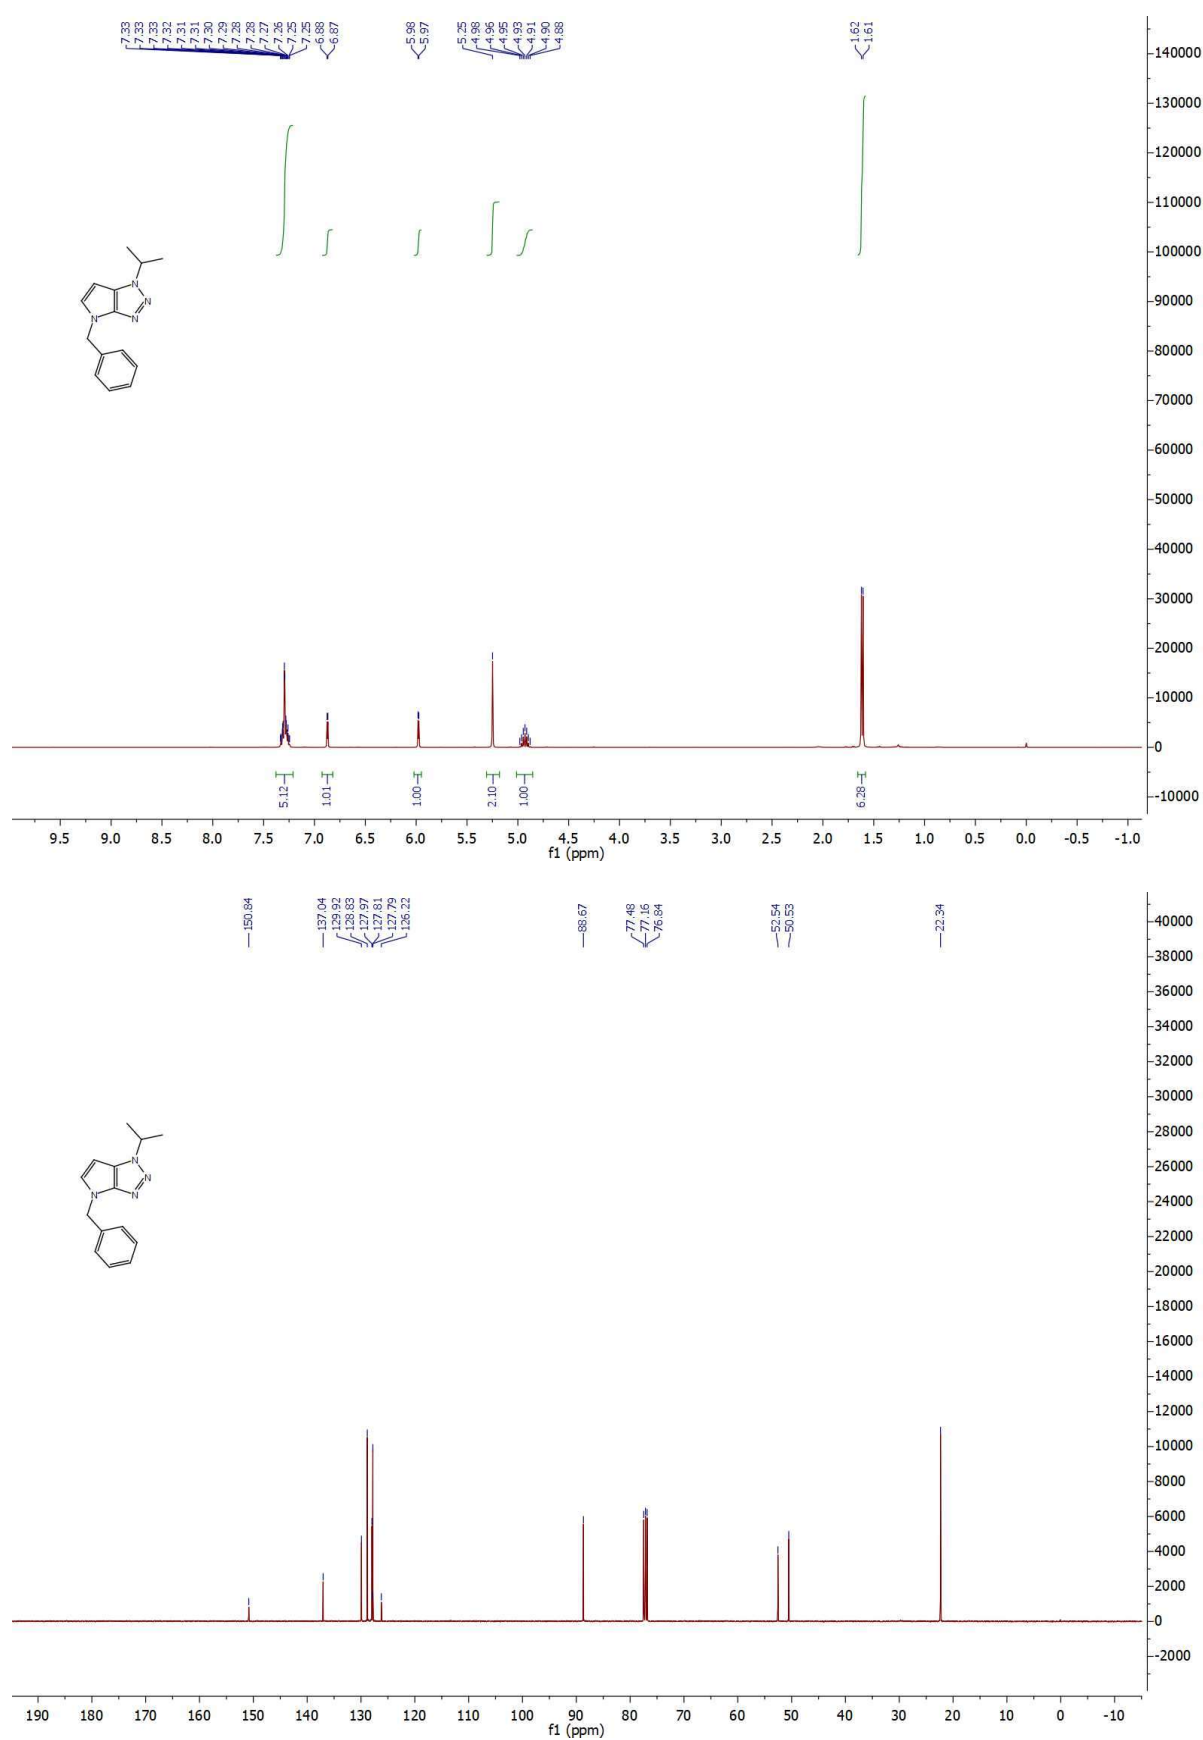

Figure S11. 4-Benzyl-1-isopropyl-1,4-dihydropyrrolo[2,3-d][1,2,3]triazole (15).

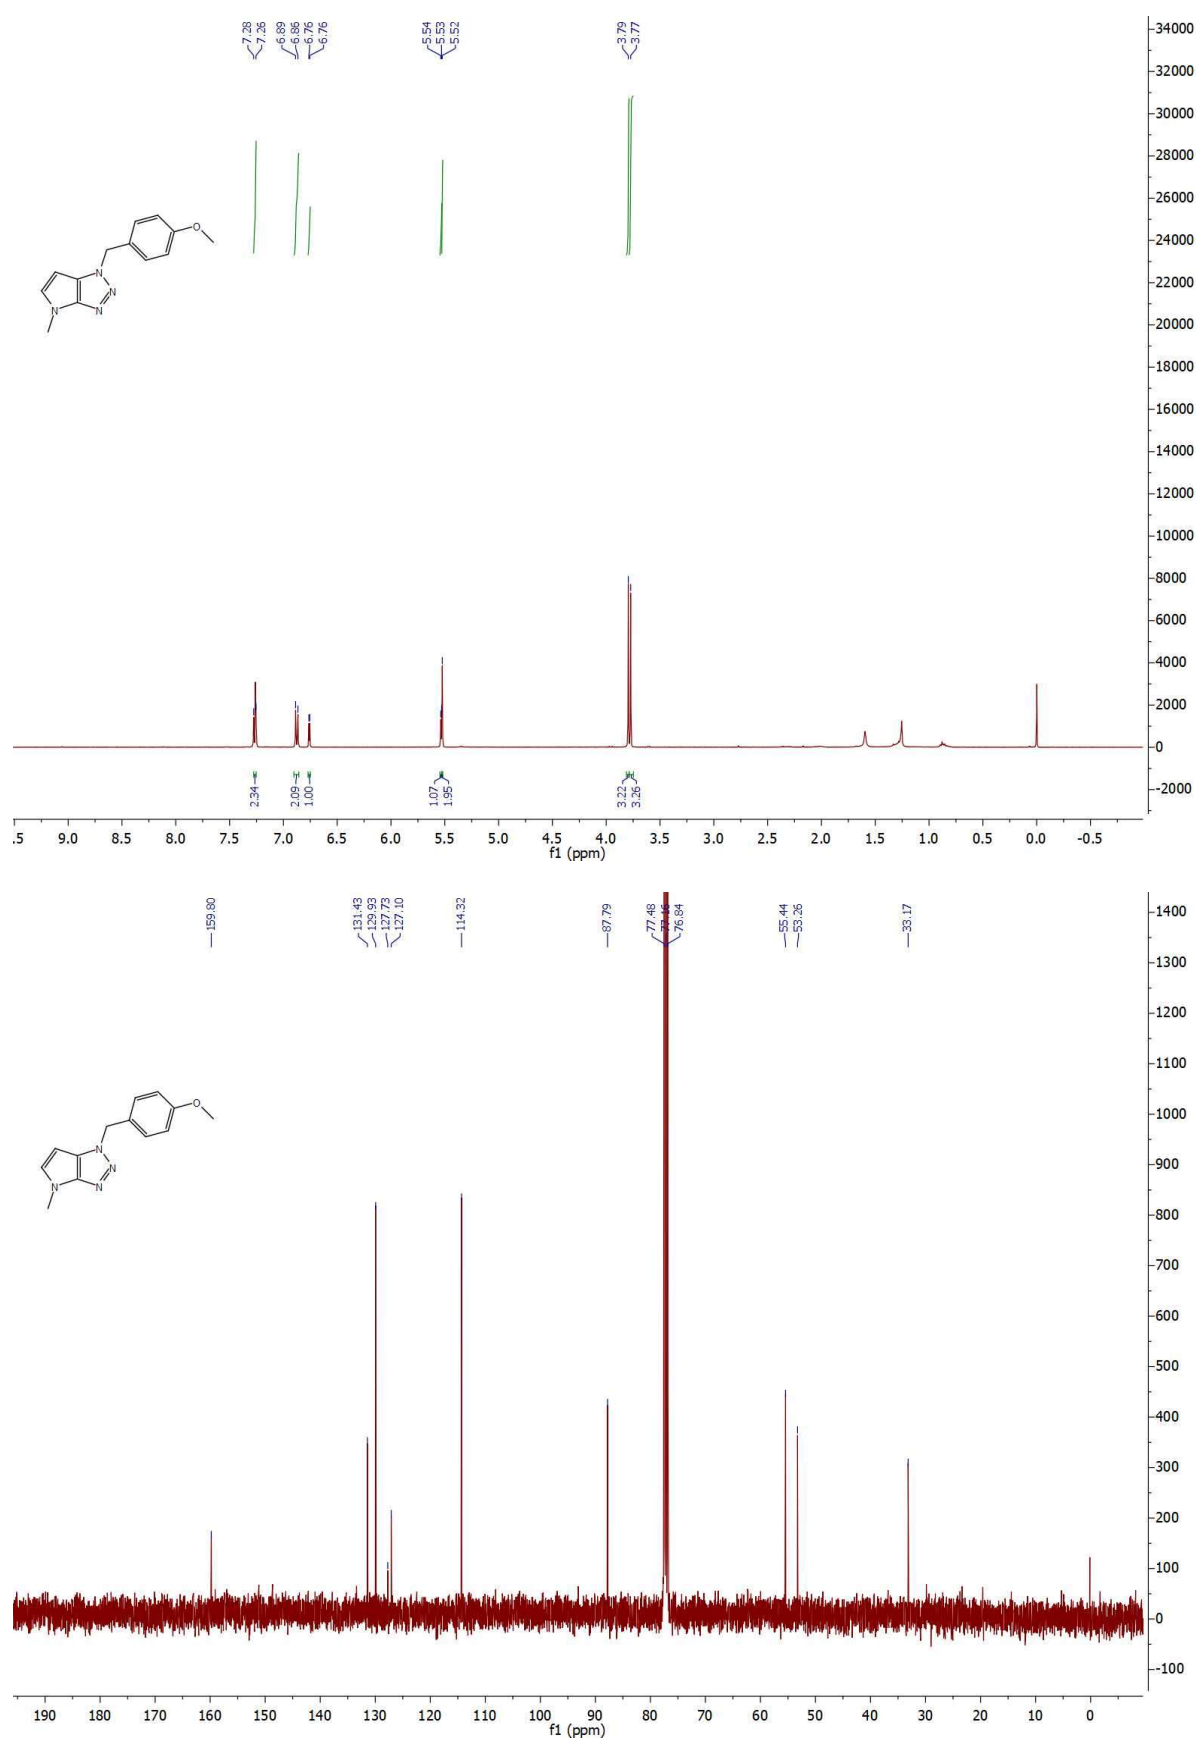

Figure S12. 1-(4-Methoxybenzyl)-4-methyl-1,4-dihydropyrrolo[2,3-*d*][1,2,3]triazole (16).

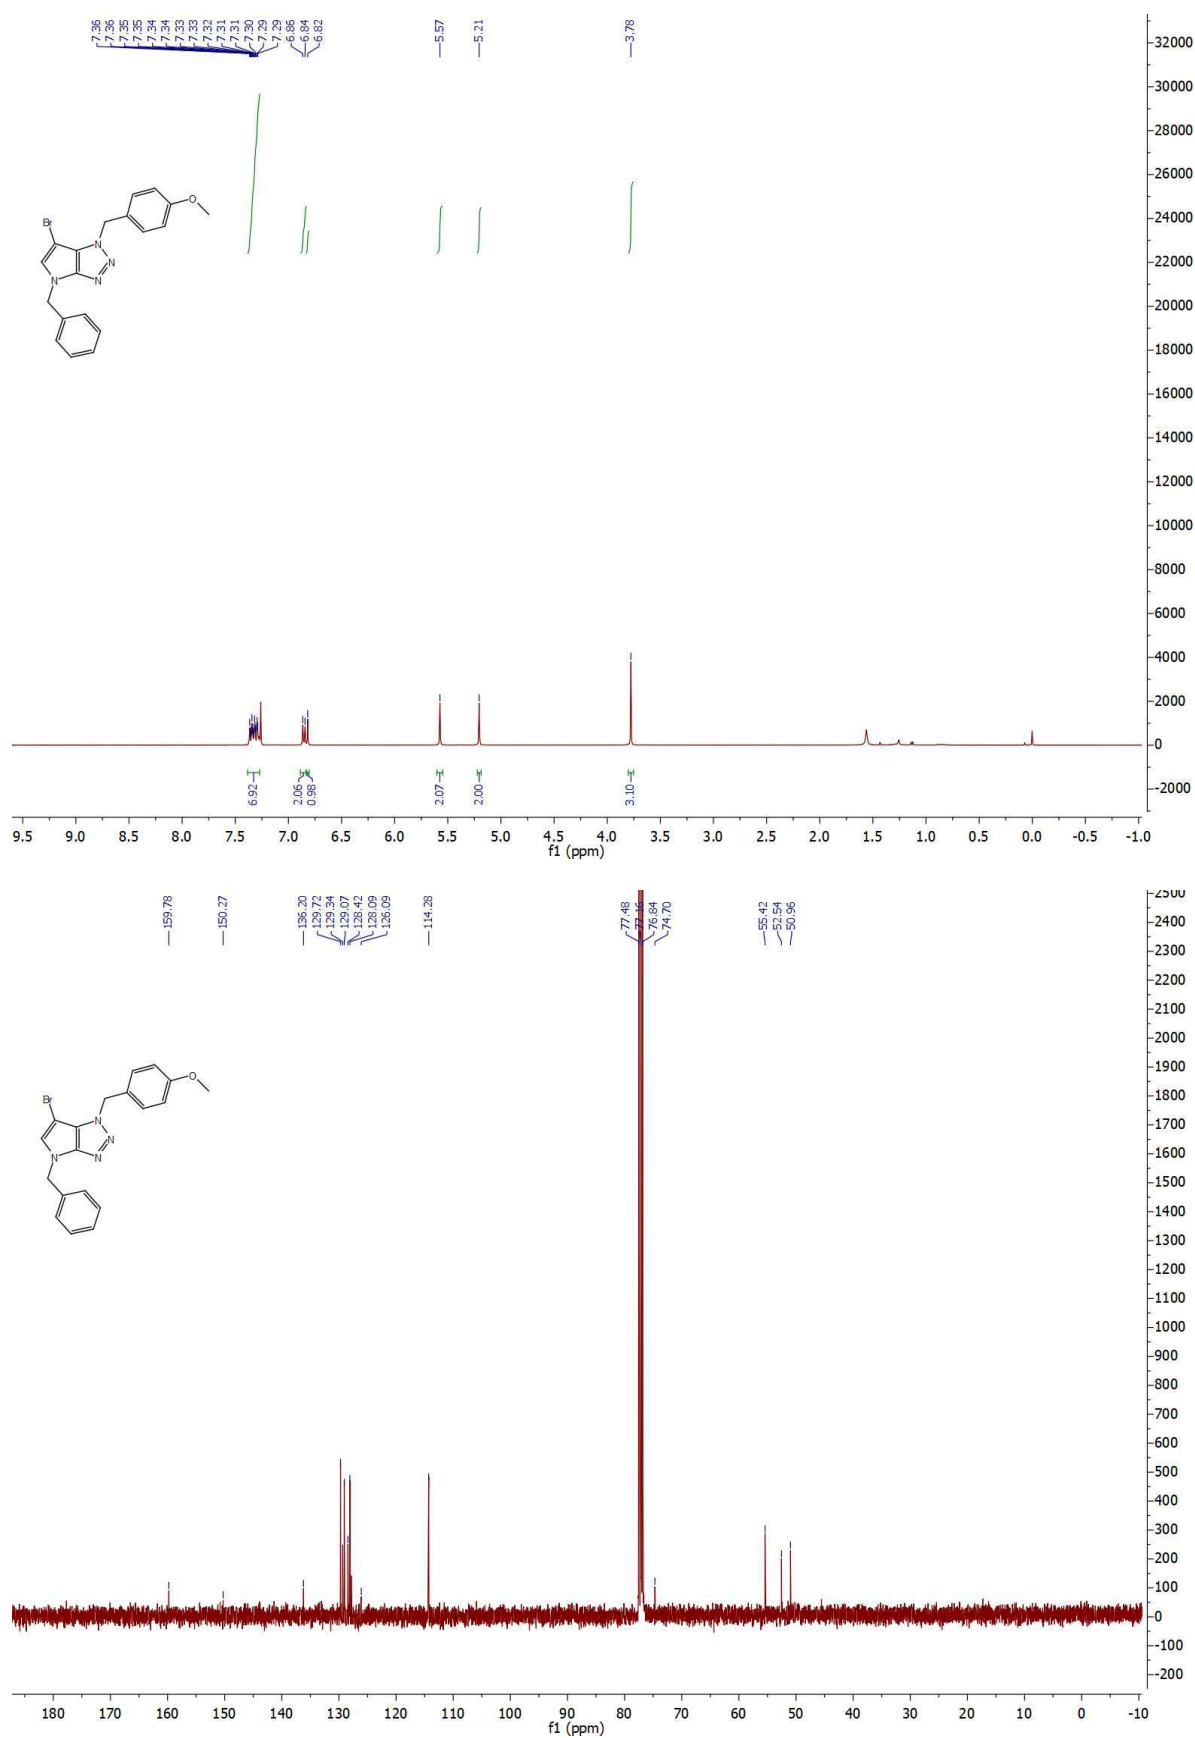

Figure S13. 4-Benzyl-6-bromo-1-(4-methoxybenzyl)-1,4-dihydropyrrolo[2,3-d][1,2,3]triazole (17).

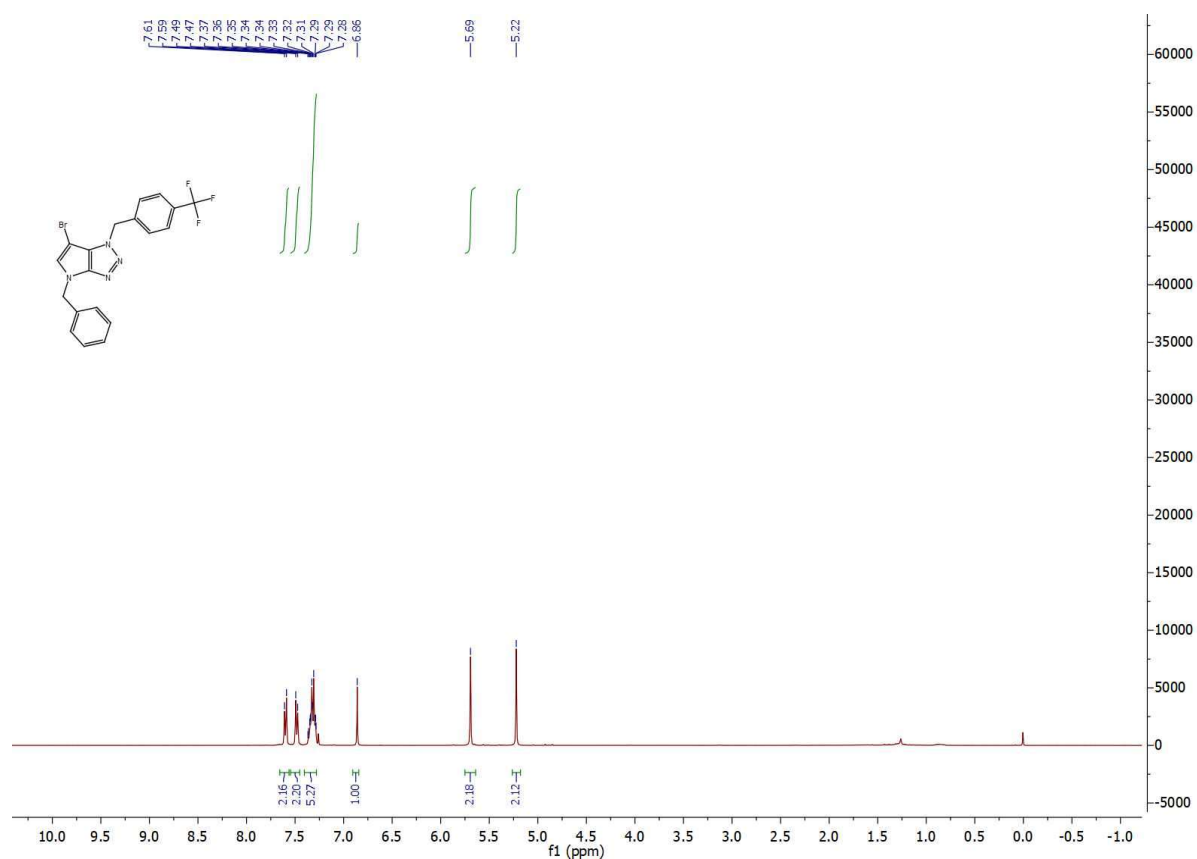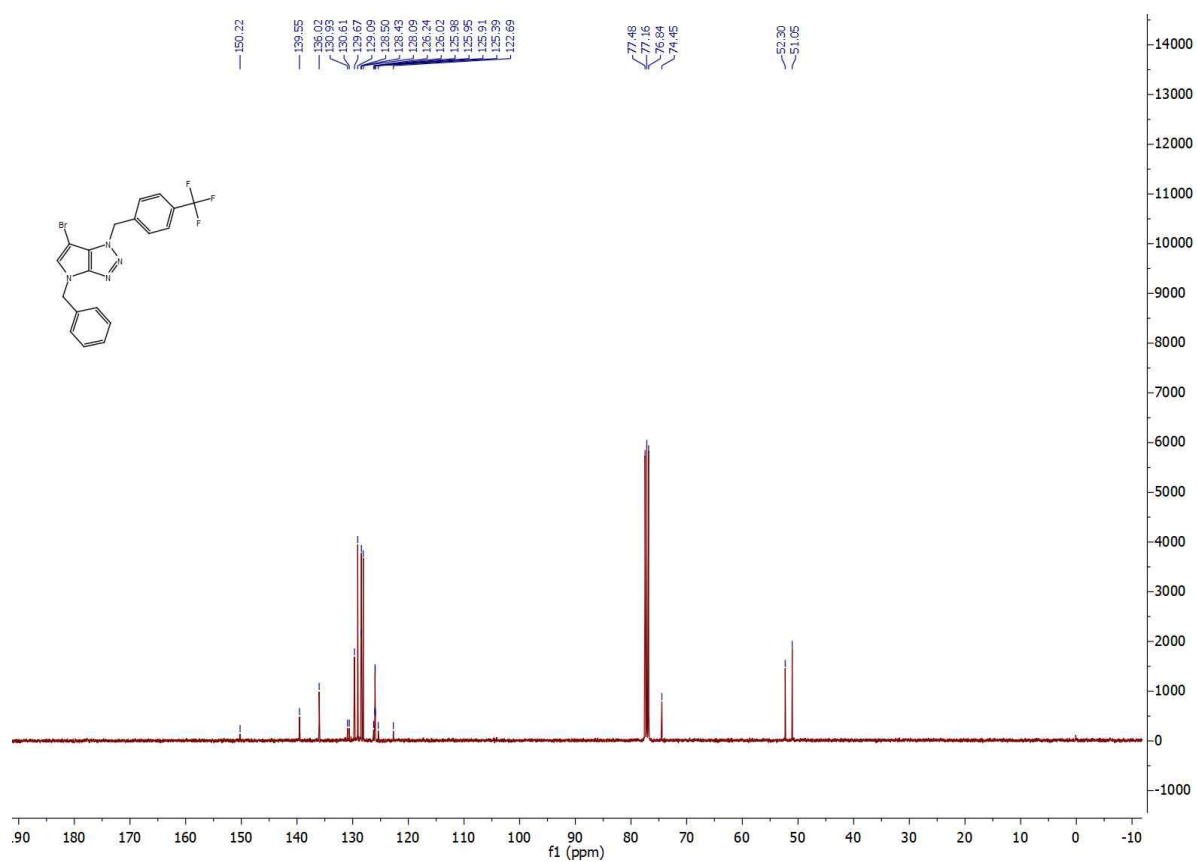

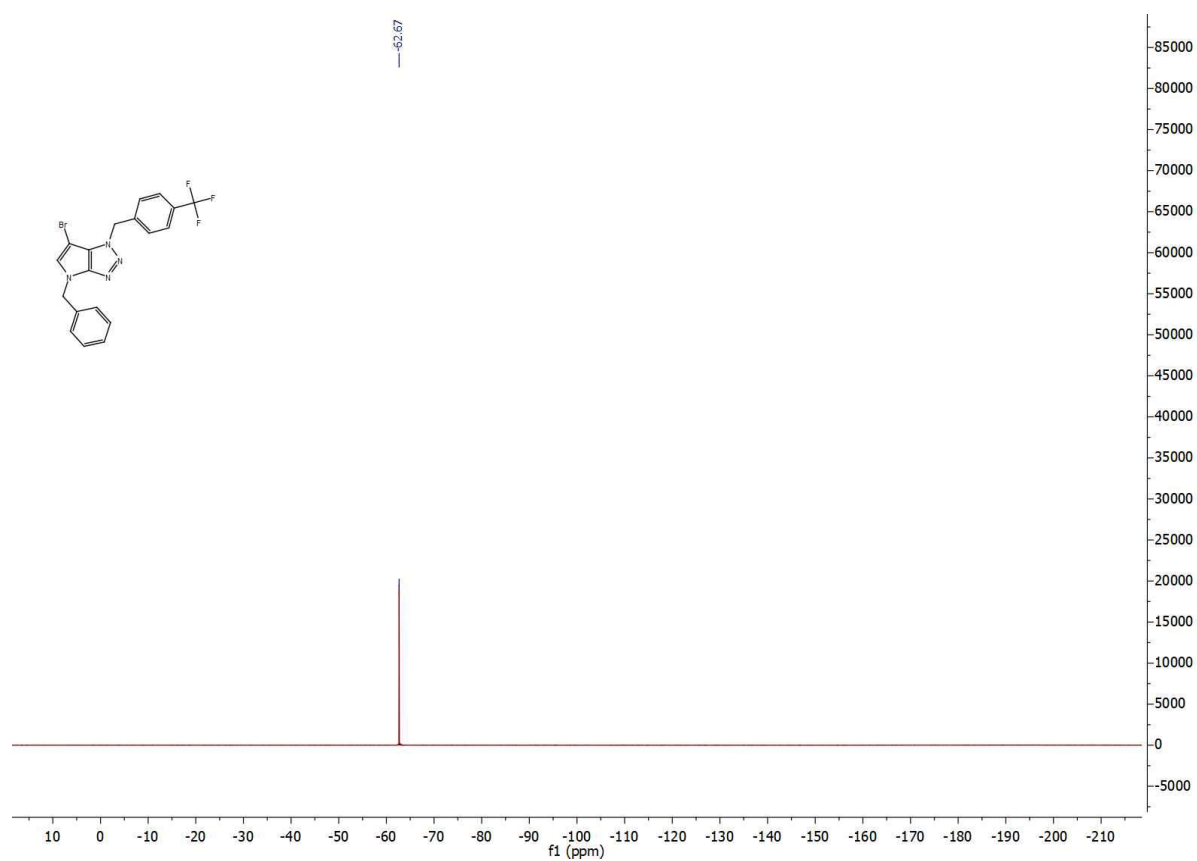

**Figure S14.** 4-Benzyl-6-bromo-1-(4-(trifluoromethyl)benzyl)-1,4-dihydropyrrolo[2,3-*d*][1,2,3]triazole (18).

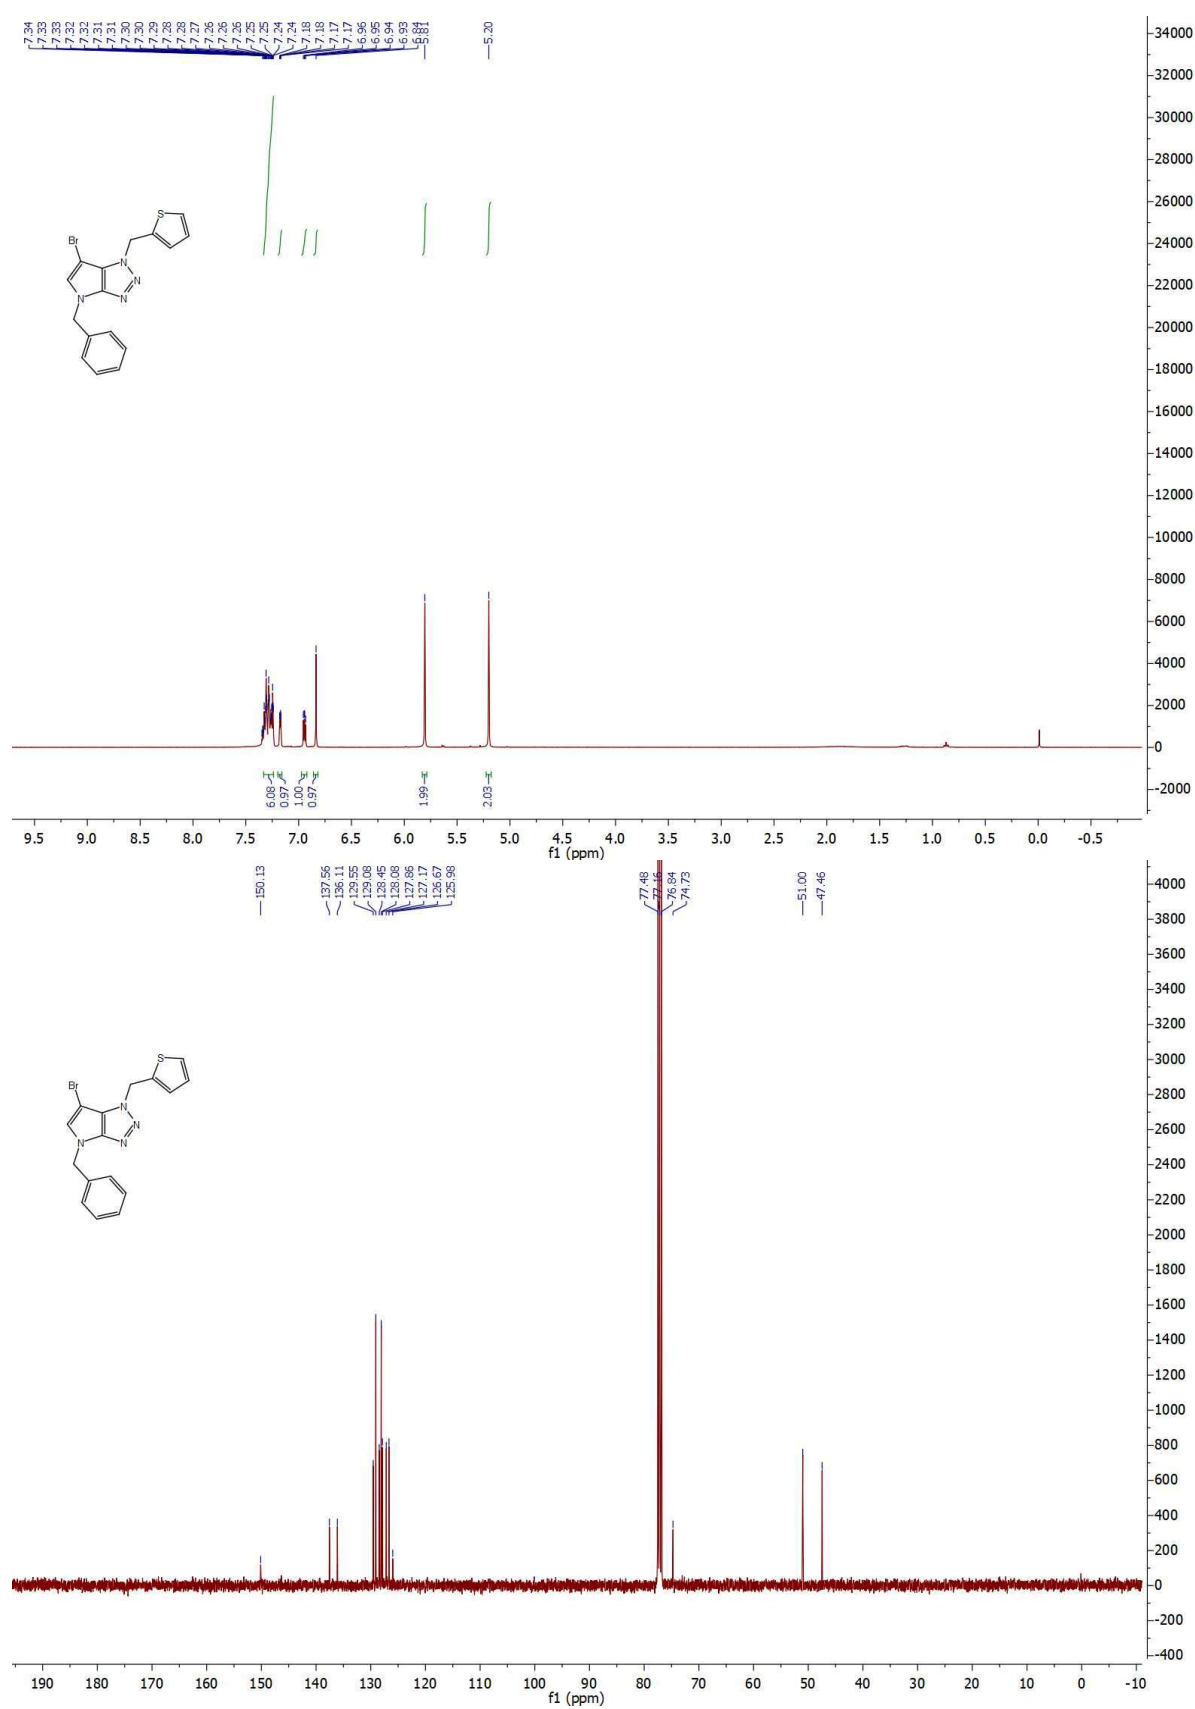

**Figure S15.** 4-Benzyl-6-bromo-1-(thiophen-2-ylmethyl)-1,4-dihydropyrrolo[2,3-d][1,2,3]triazole (19).

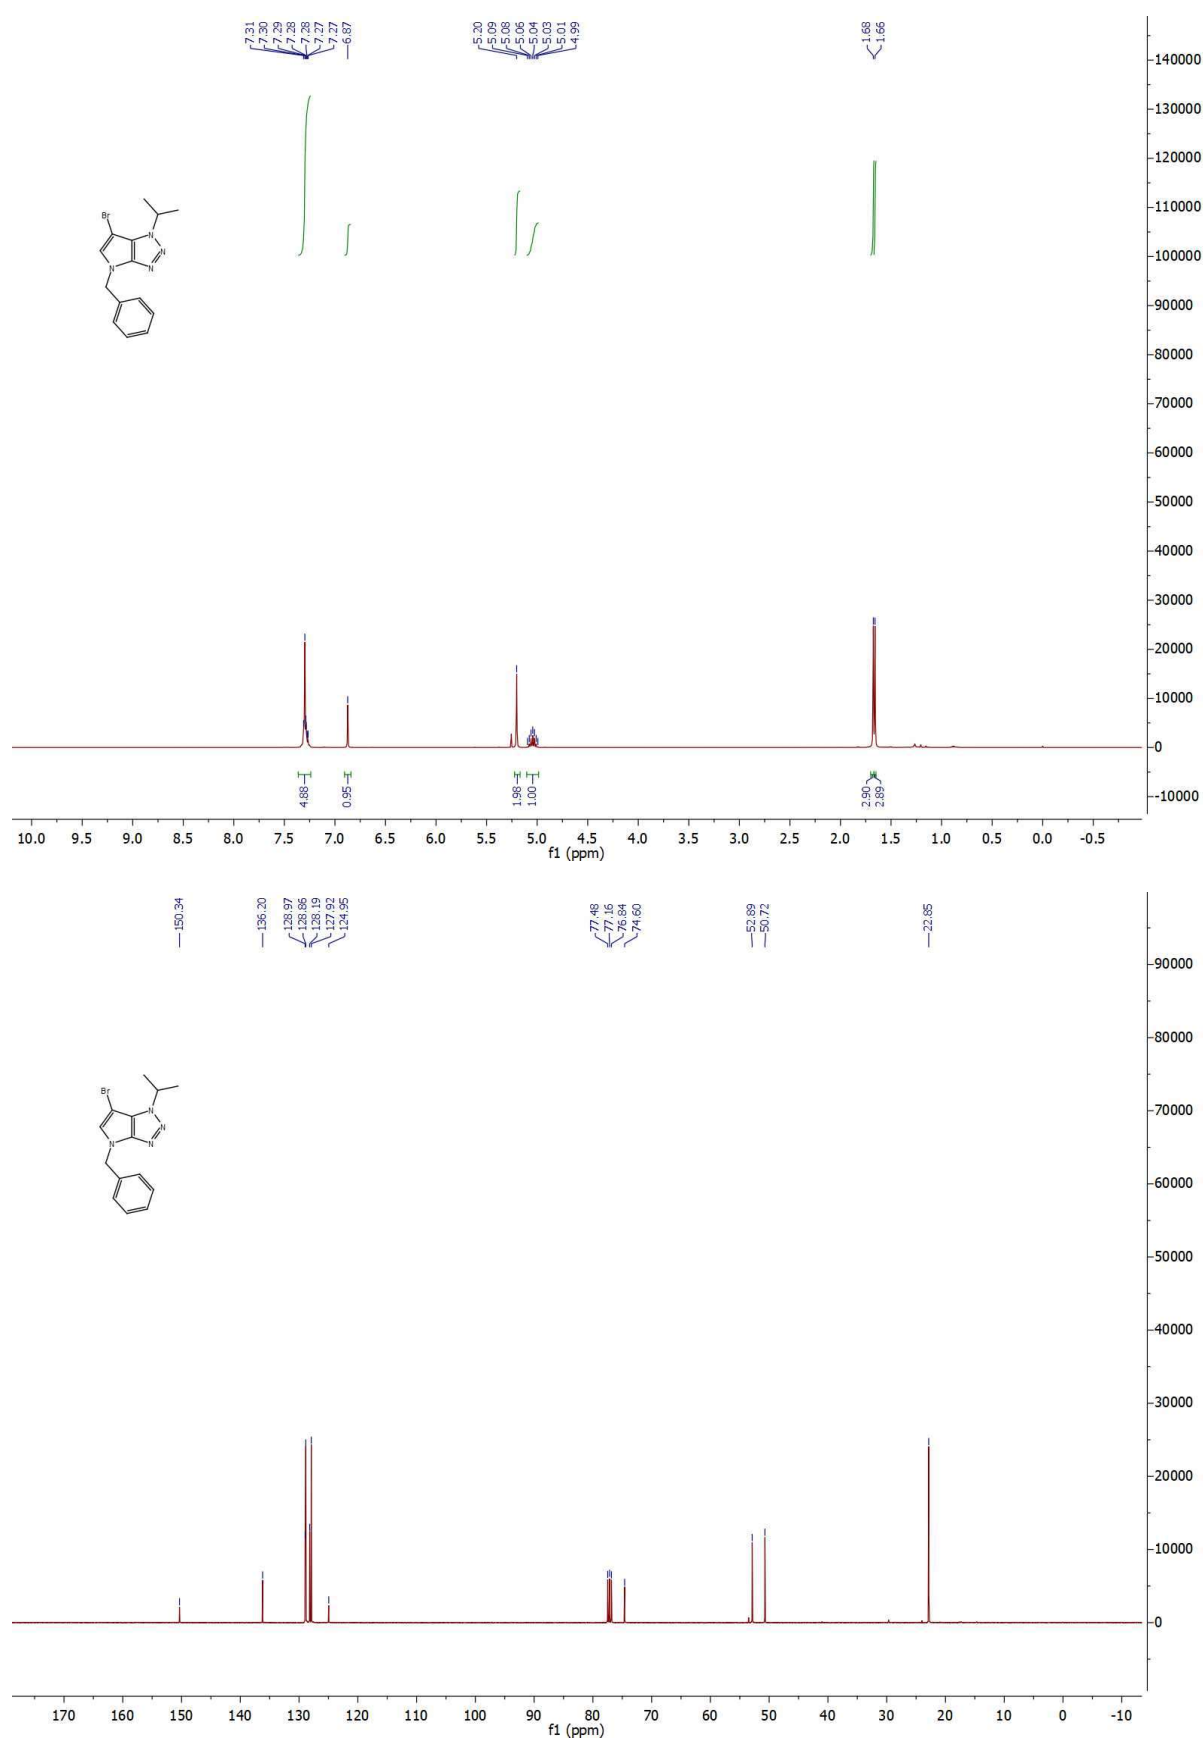

Figure S16. 4-Benzyl-6-bromo-1-isopropyl-1,4-dihydropyrrolo[2,3-d][1,2,3]triazole (20).

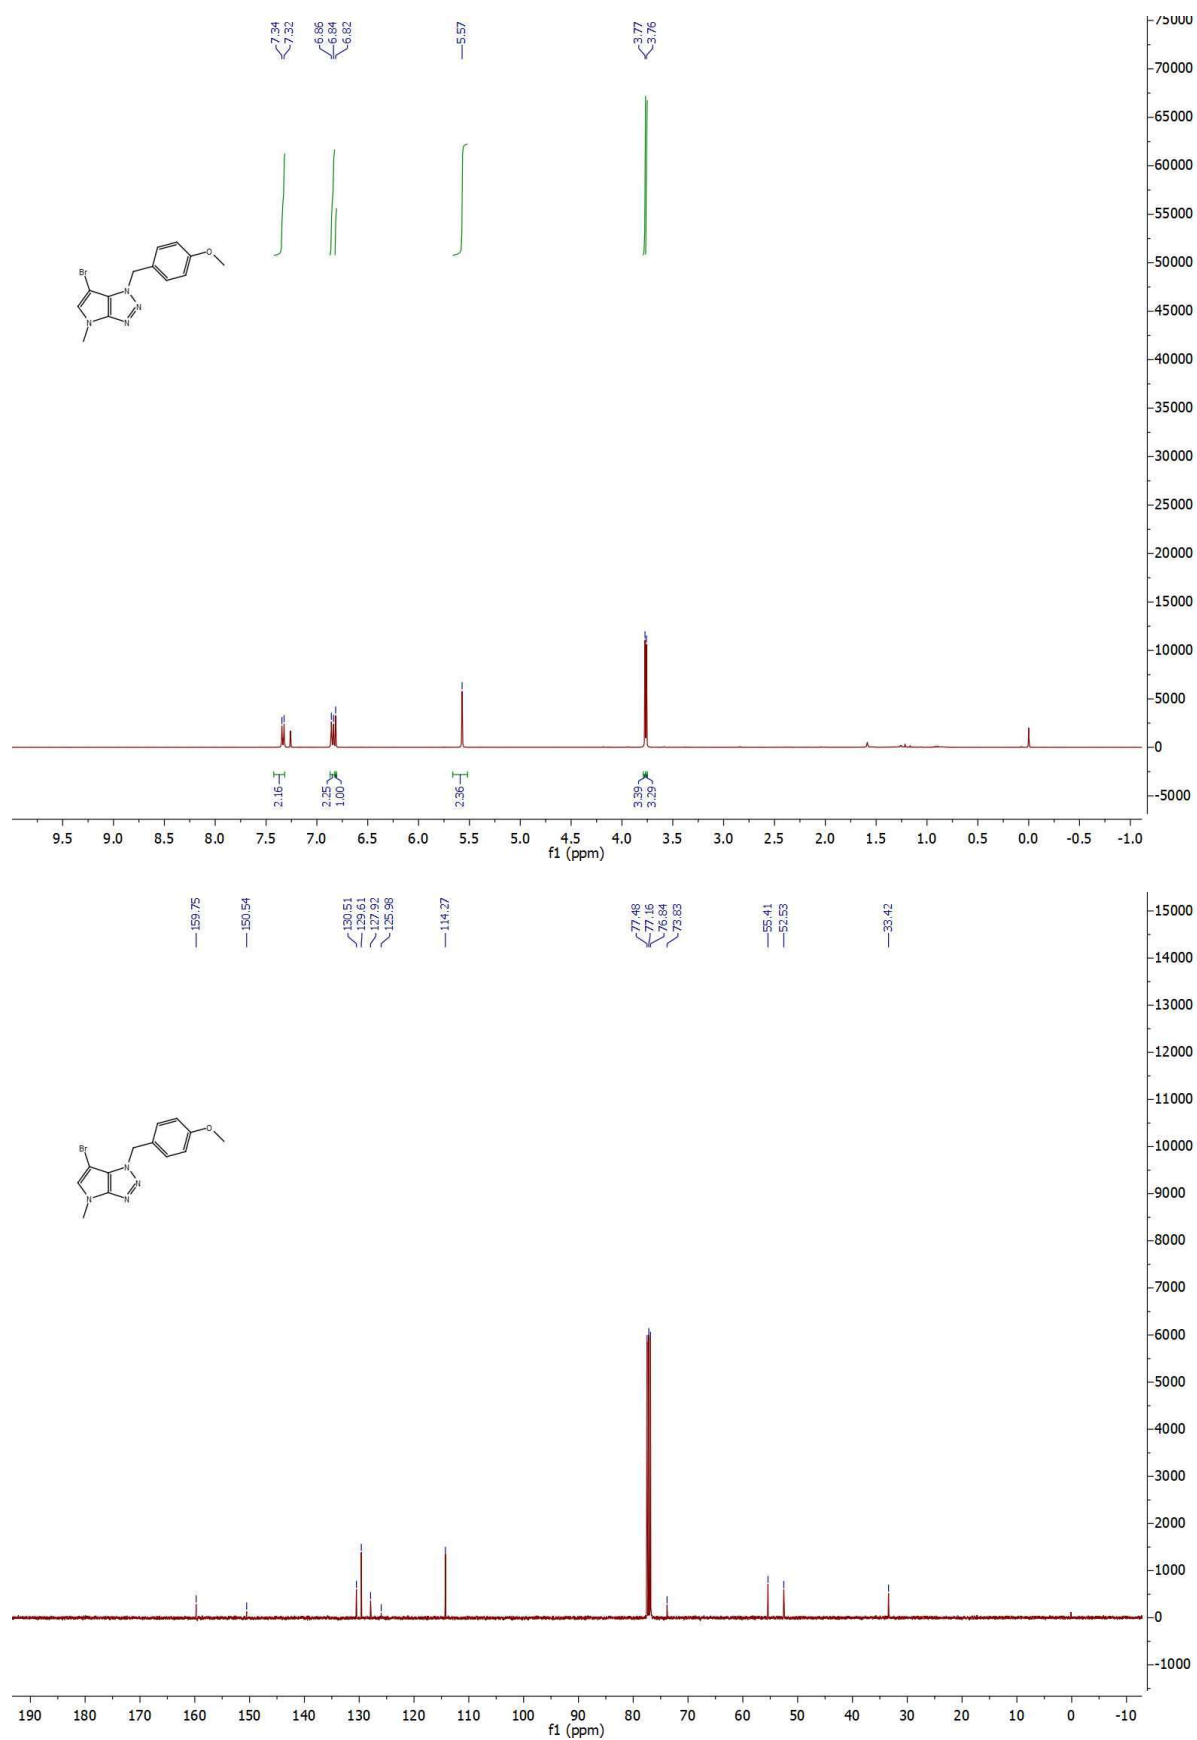

Figure S17. 6-Bromo-1-(4-methoxybenzyl)-4-methyl-1,4-dihydropyrrolo[2,3-d][1,2,3]triazole (21).

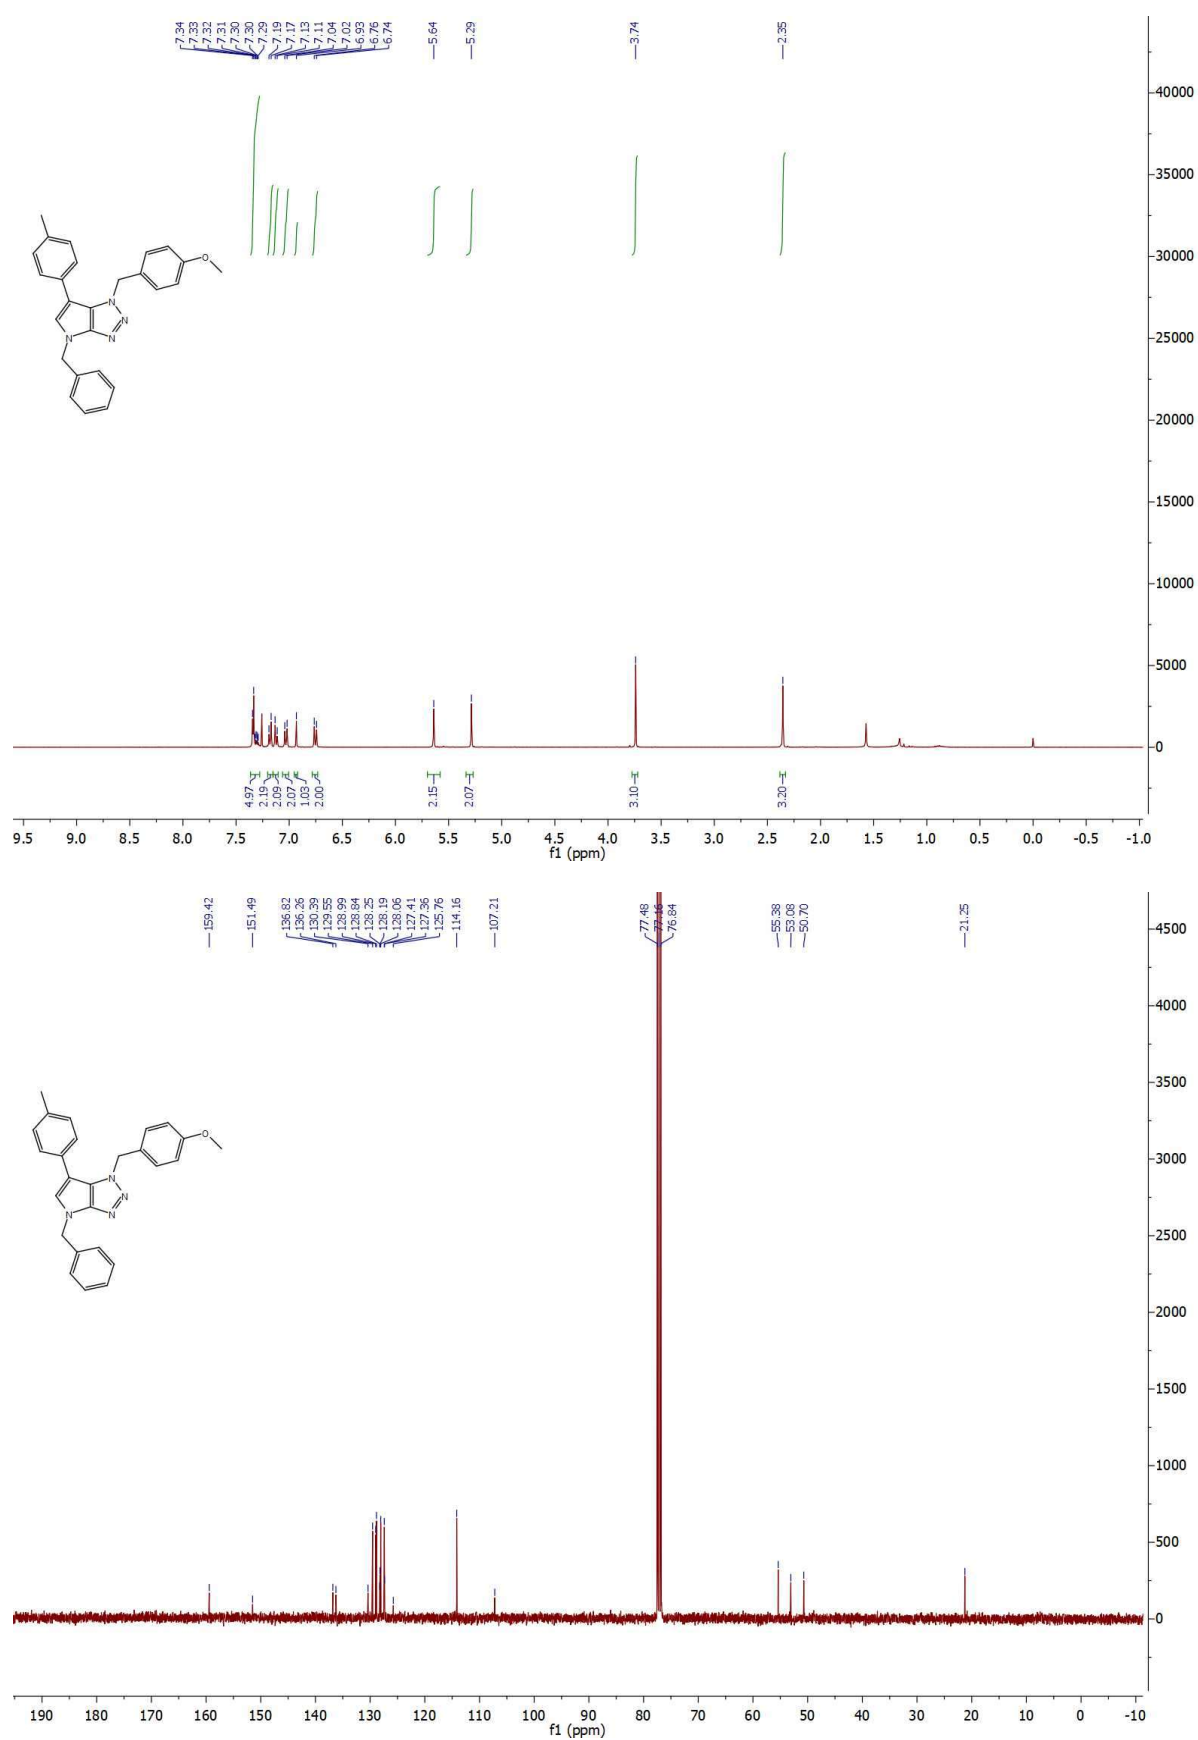

Figure S18. 4-Benzyl-1-(4-methoxybenzyl)-6-(*p*-tolyl)-1,4-dihydropyrrolo[2,3-*d*][1,2,3]triazole (22).

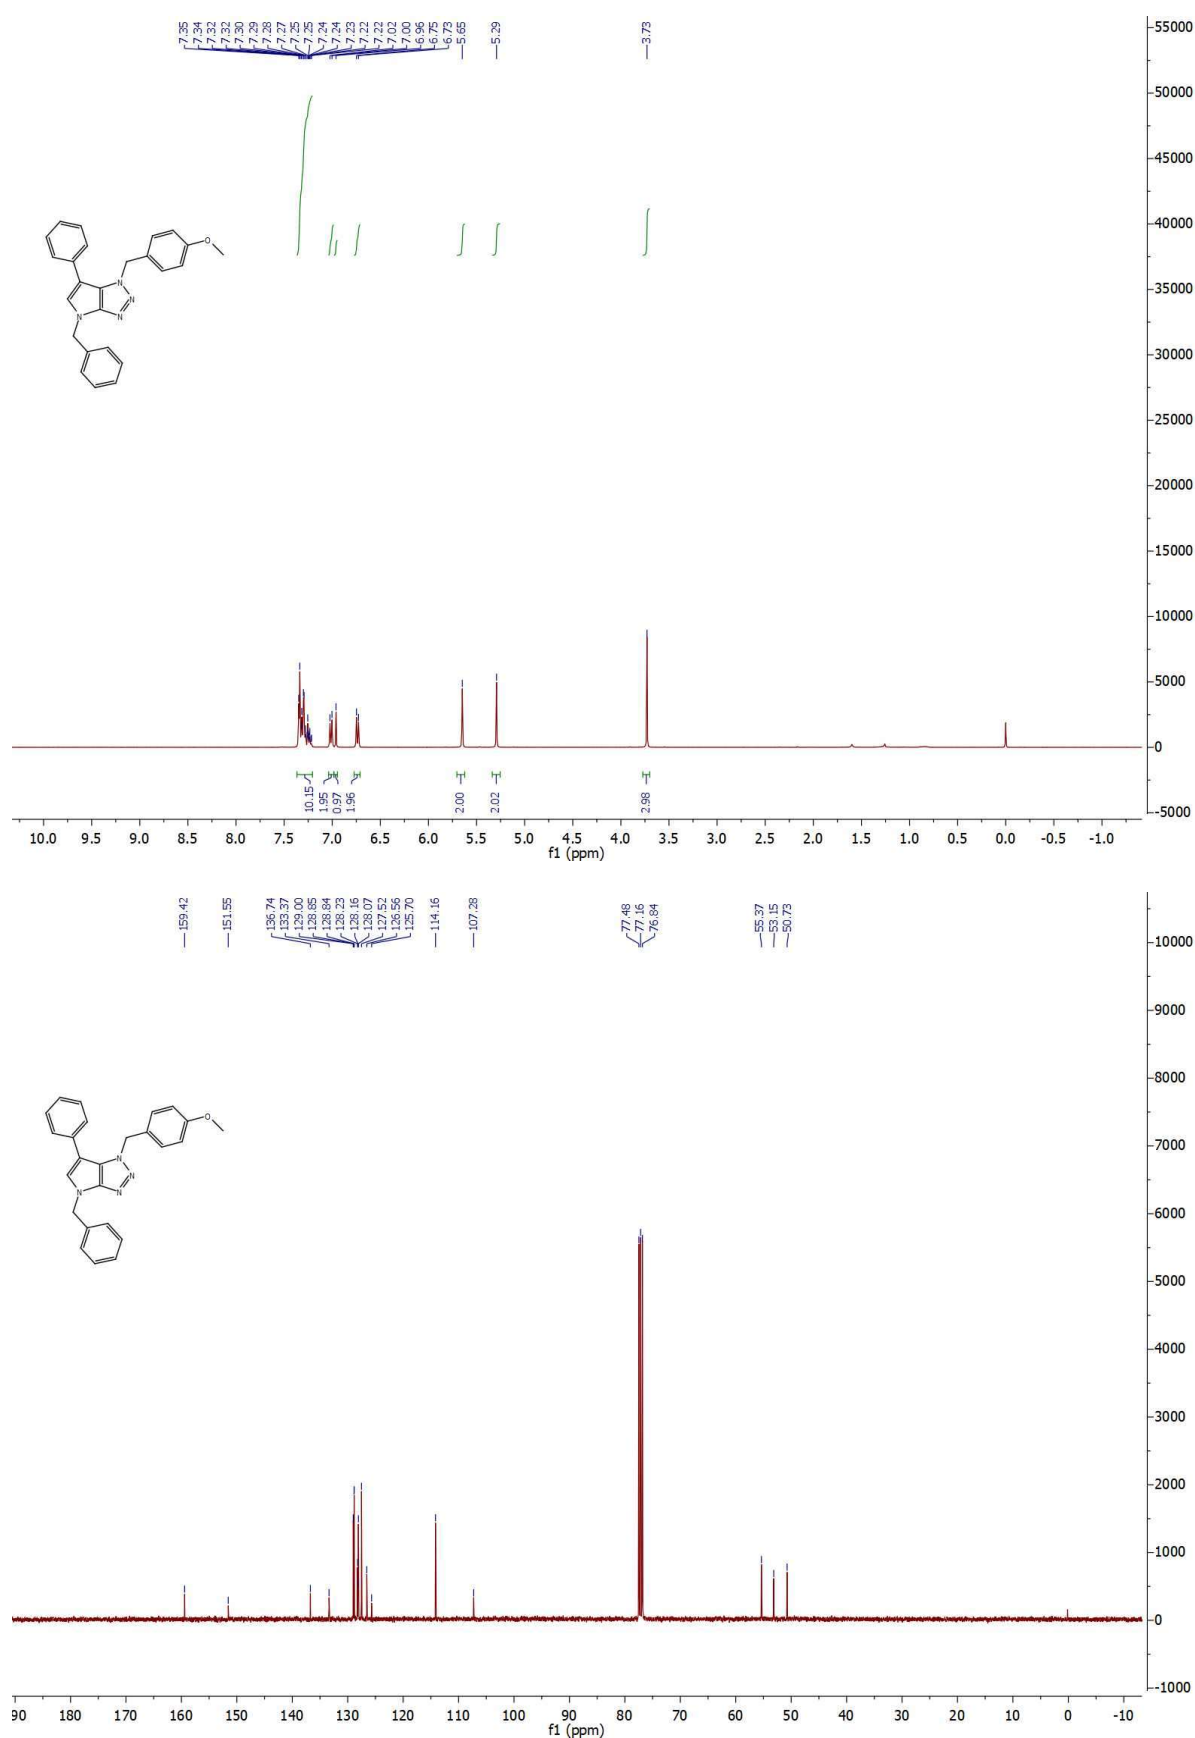

Figure S19. 4-Benzyl-1-(4-methoxybenzyl)-6-phenyl-1,4-dihydropyrrolo[2,3-d][1,2,3]triazole (23).

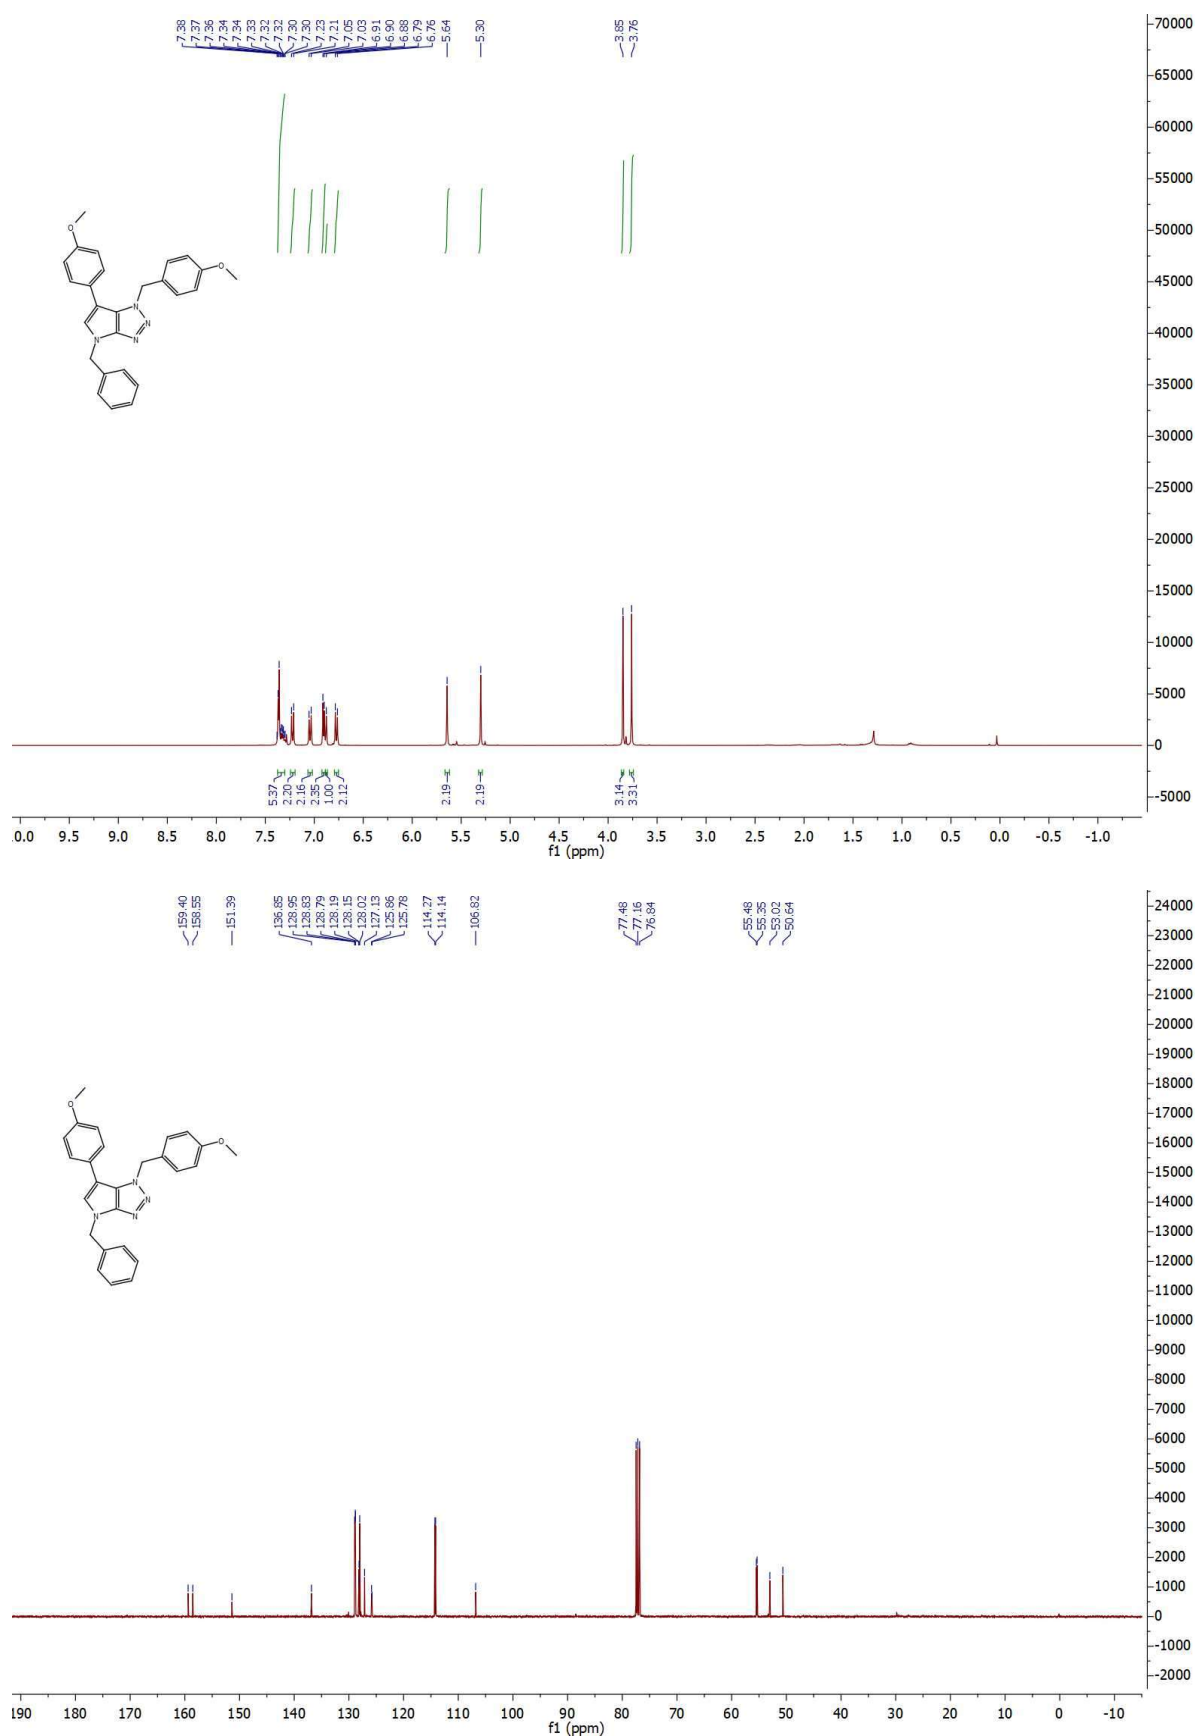

**Figure S20.** 4-Benzyl-1-(4-methoxybenzyl)-6-(4-methoxyphenyl)-1,4-dihydropyrrolo[2,3-d][1,2,3]triazole (24).

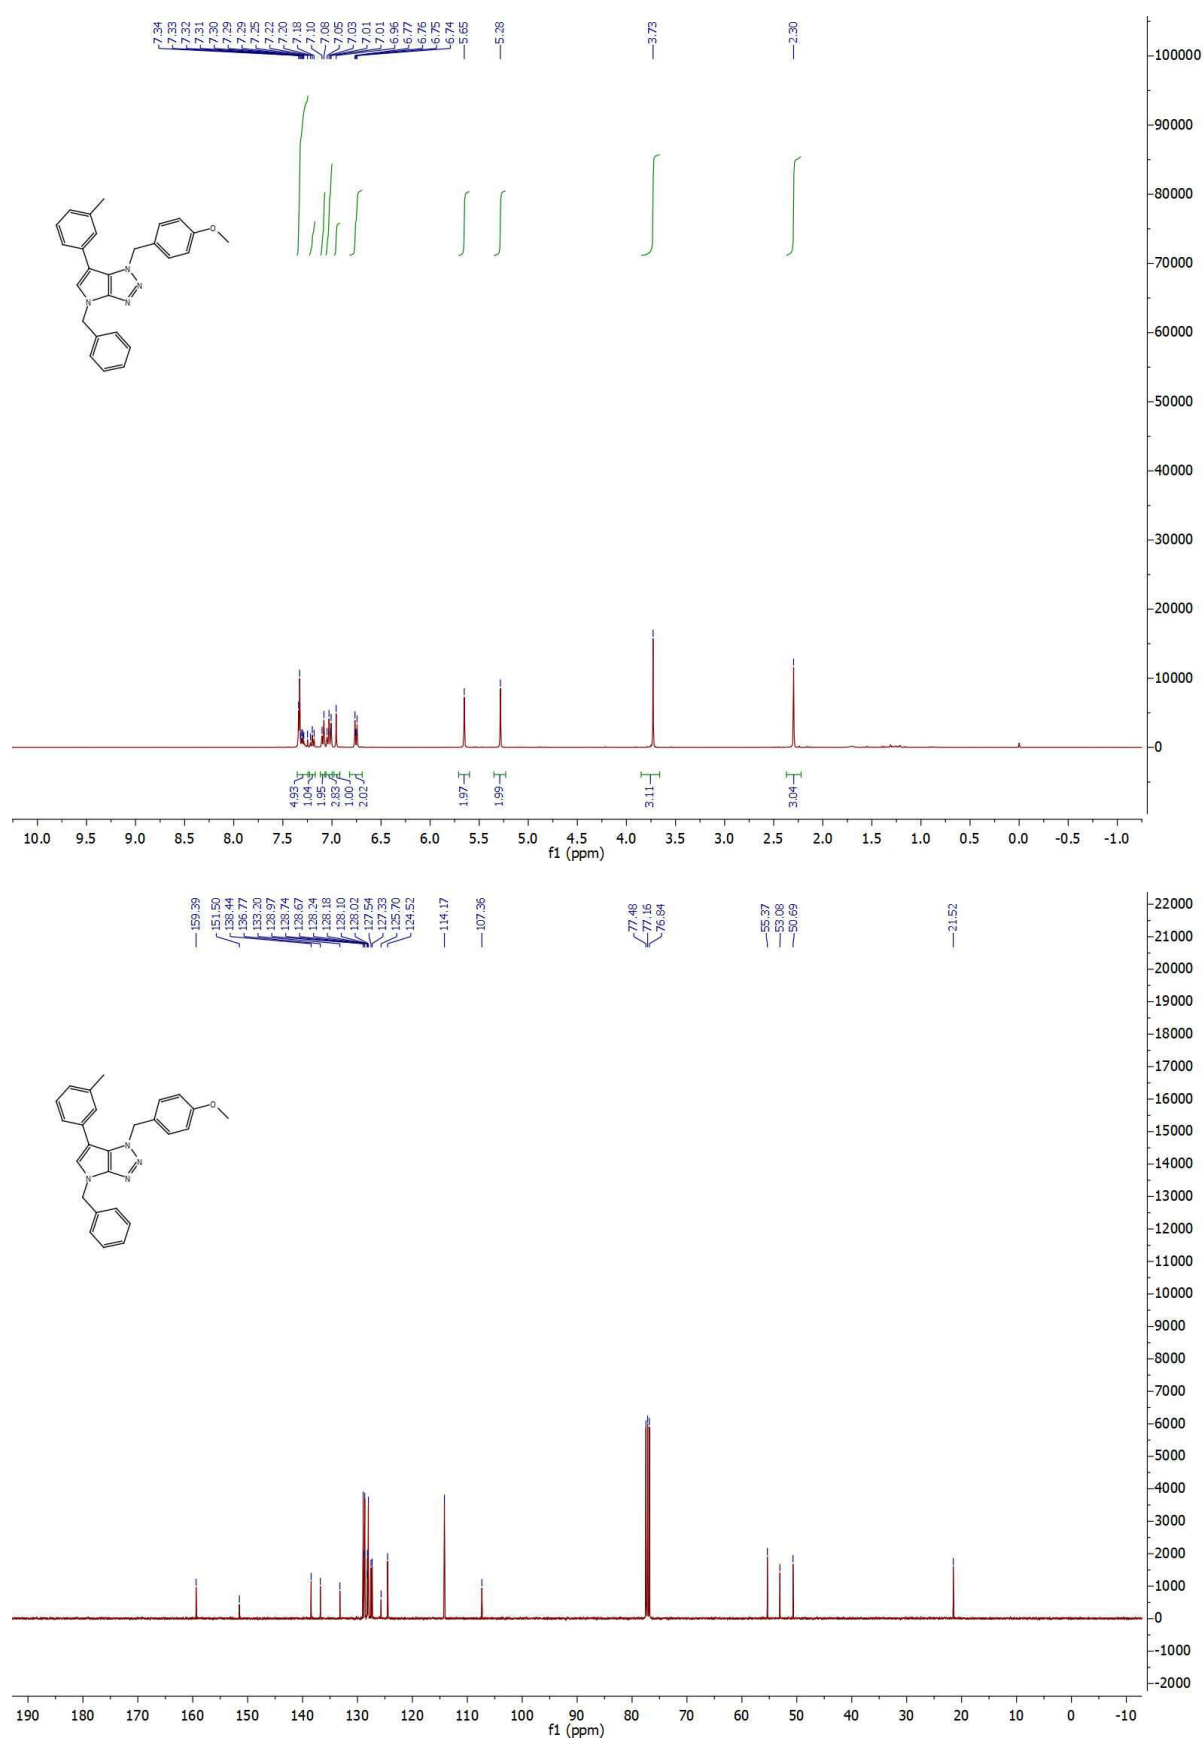

Figure S21. 4-Benzyl-1-(4-methoxybenzyl)-6-(*m*-tolyl)-1,4-dihydropyrrolo[2,3-*d*][1,2,3]triazole (25).

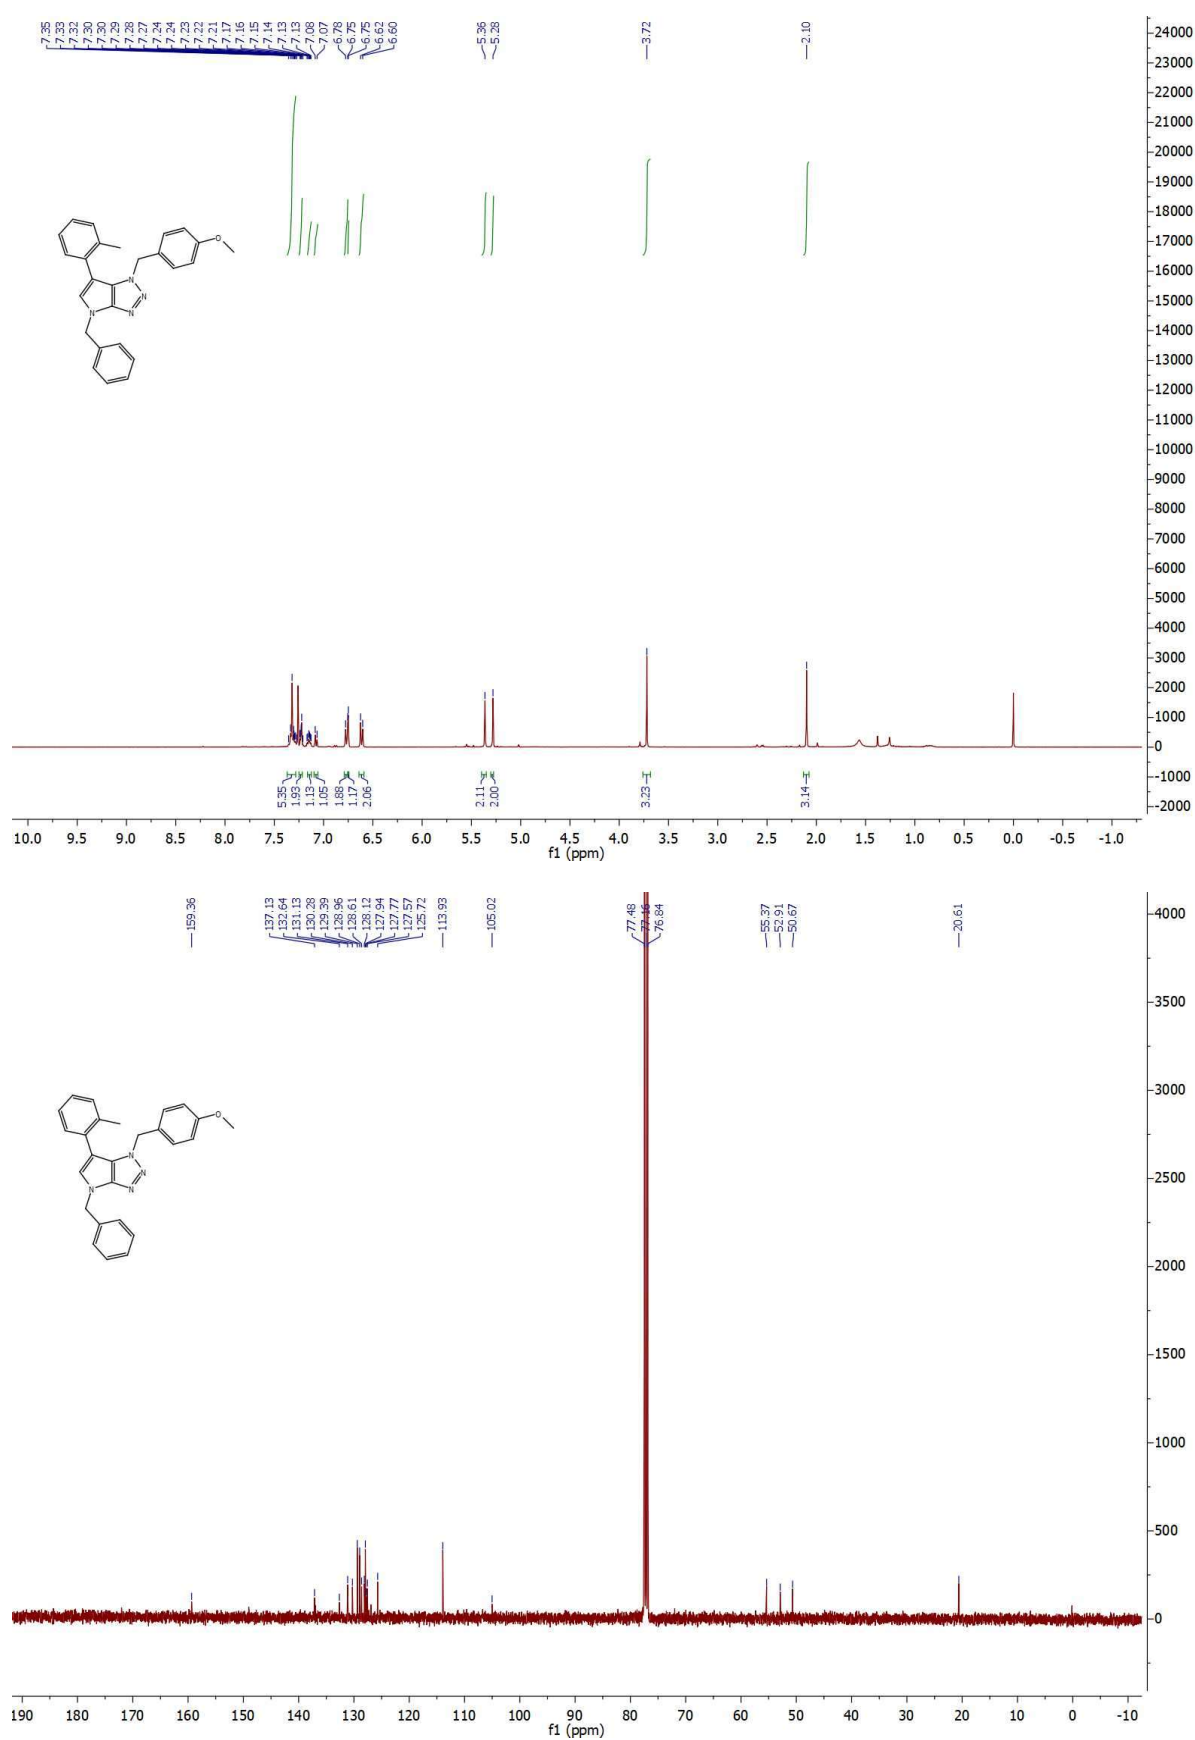

Figure S22. 4-Benzyl-1-(4-methoxybenzyl)-6-(*o*-tolyl)-1,4-dihydropyrrolo[2,3-*d*][1,2,3]triazole (26).

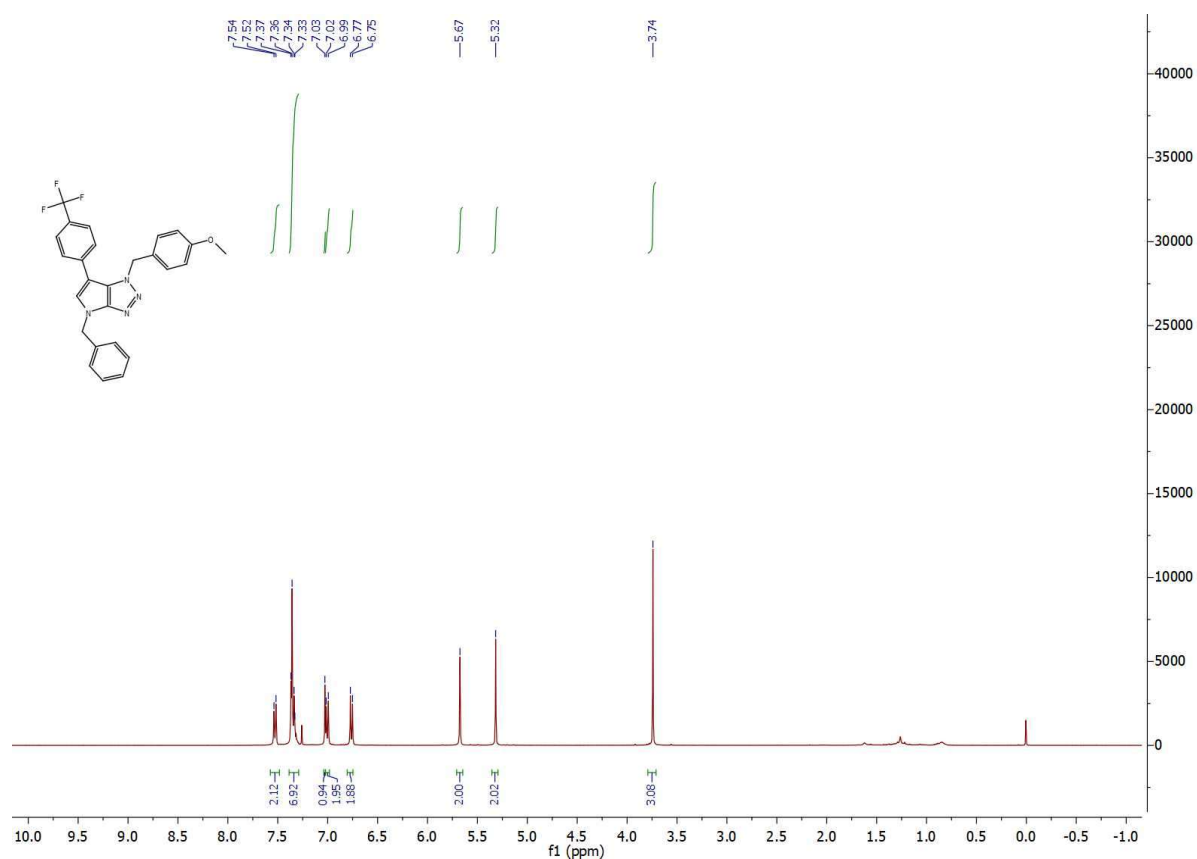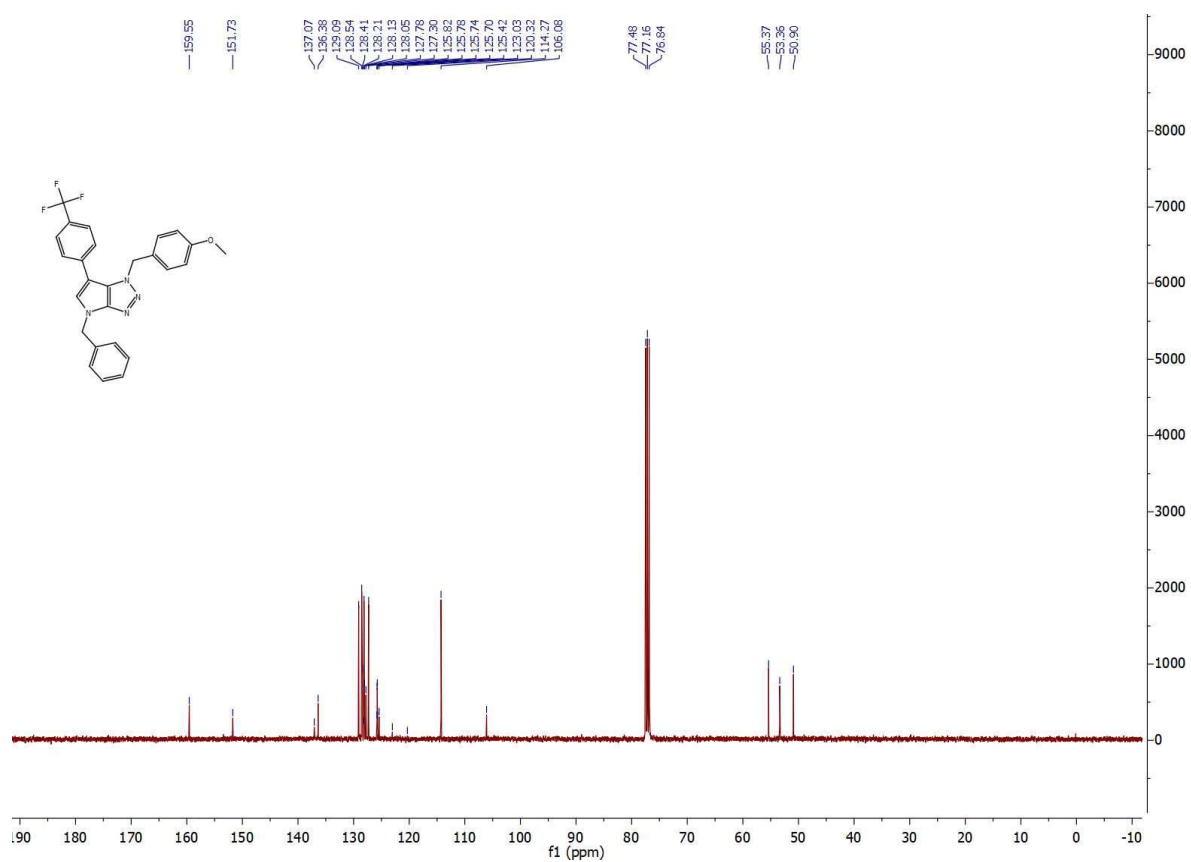

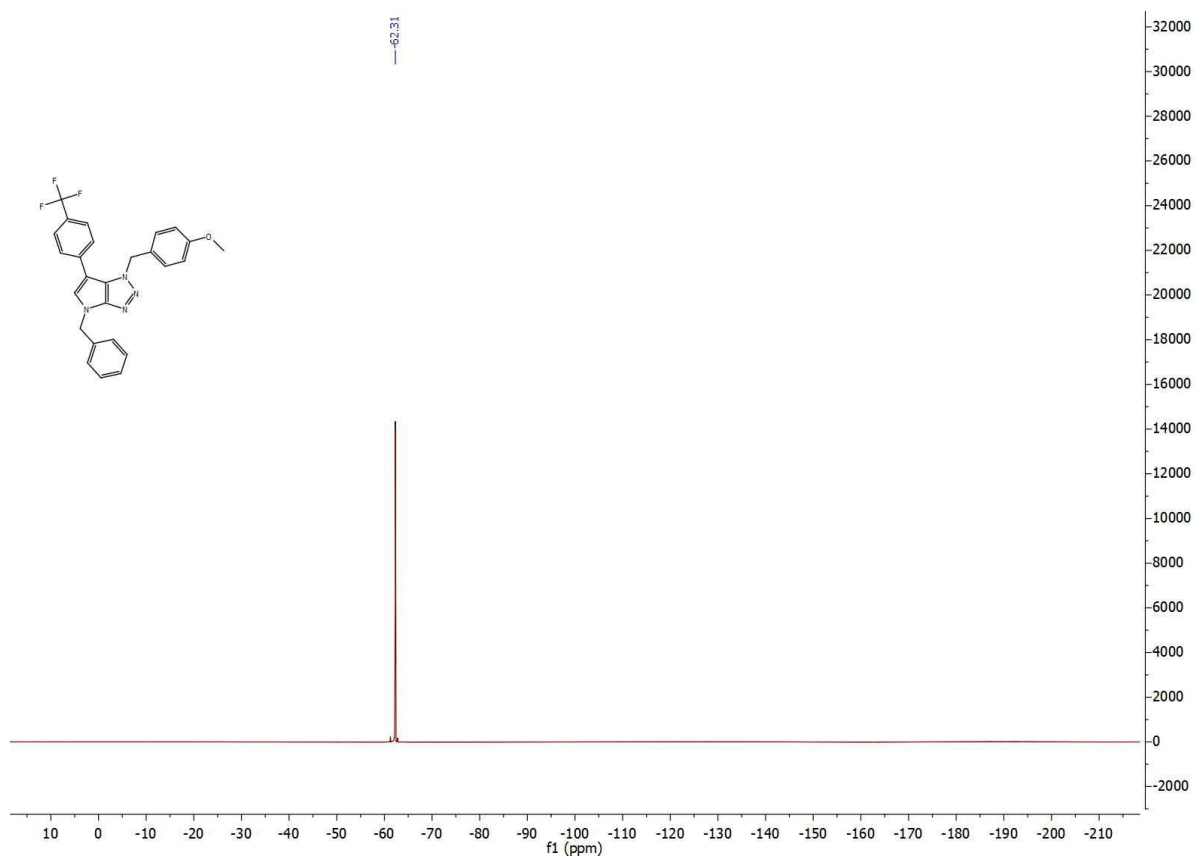

**Figure S23.** 4-Benzyl-1-(4-methoxybenzyl)-6-(4-(trifluoromethyl)phenyl)-1,4-dihydropyrrolo[2,3-d][1,2,3]triazole (28).

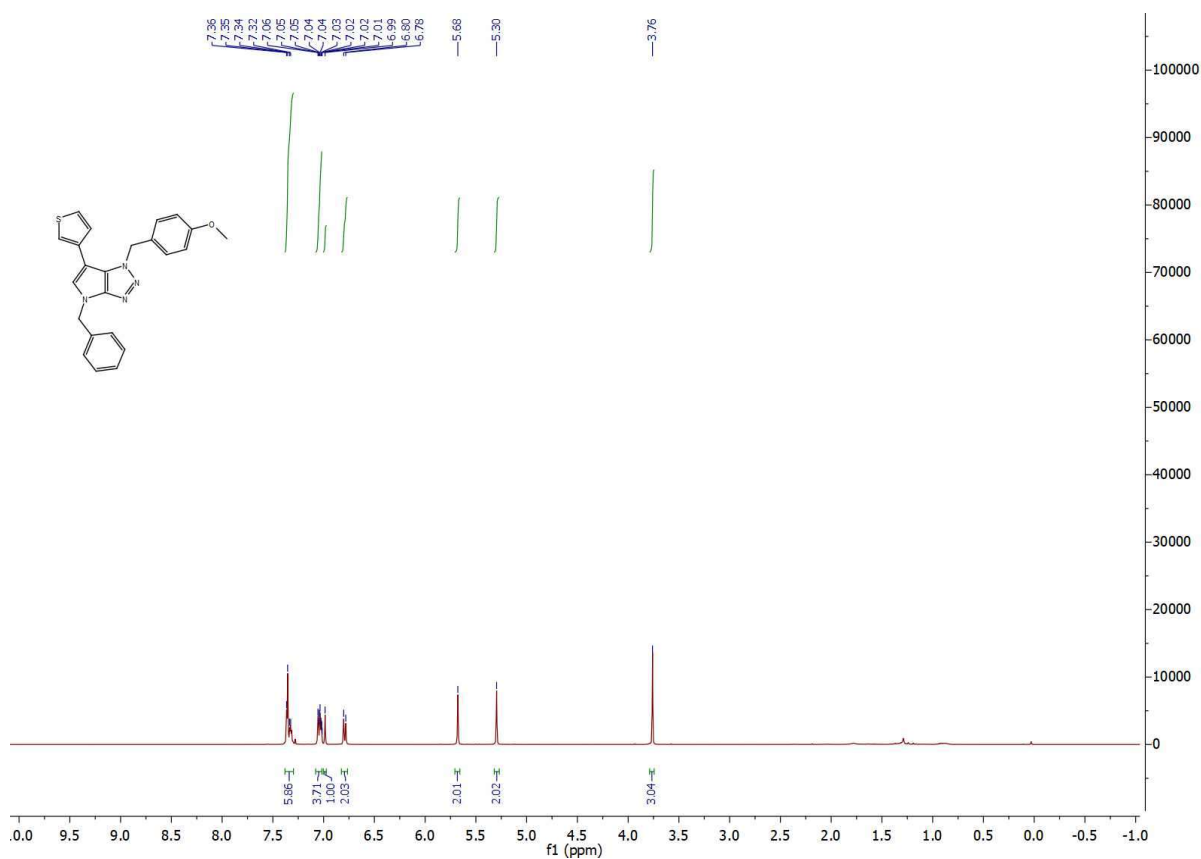

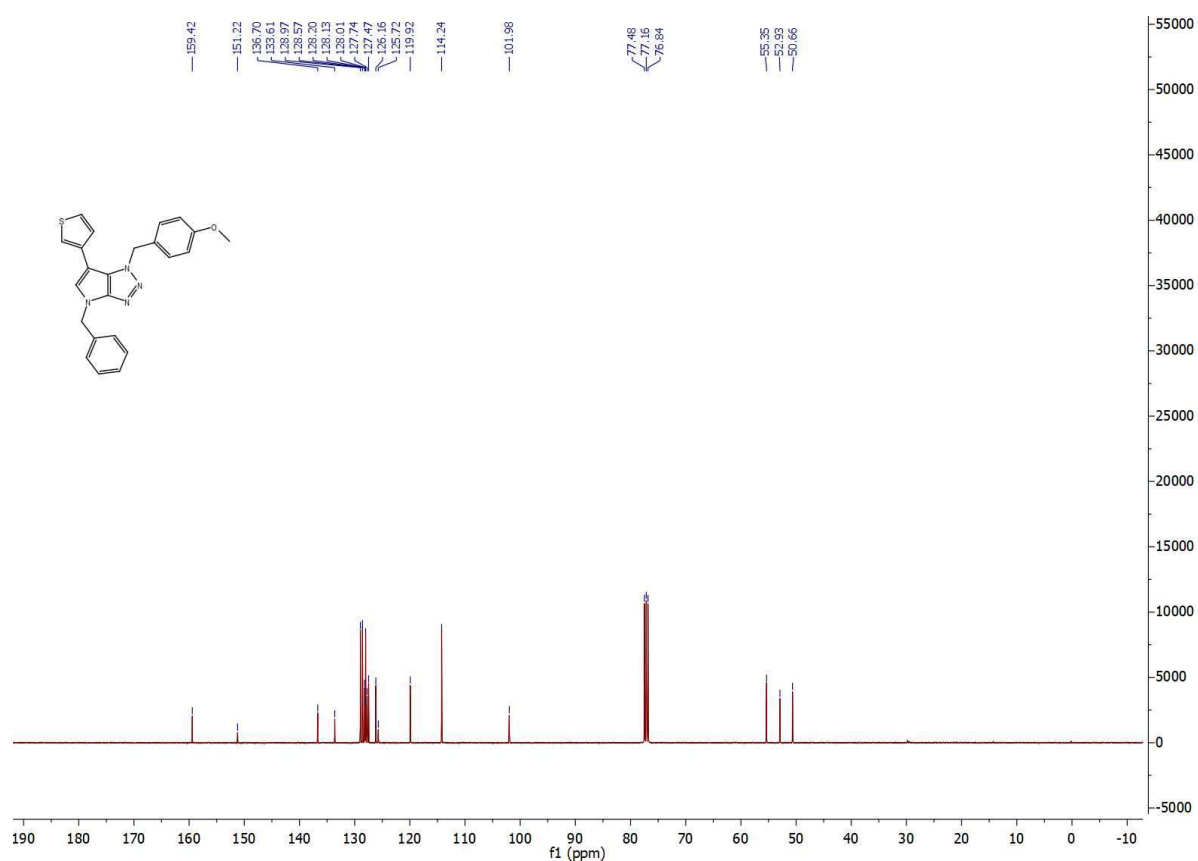

**Figure S24.** 4-Benzyl-1-(4-methoxybenzyl)-4-methyl-5,6-di-*p*-tolyl-1,4-dihydropyrrolo[2,3-*d*][1,2,3]triazole (29).

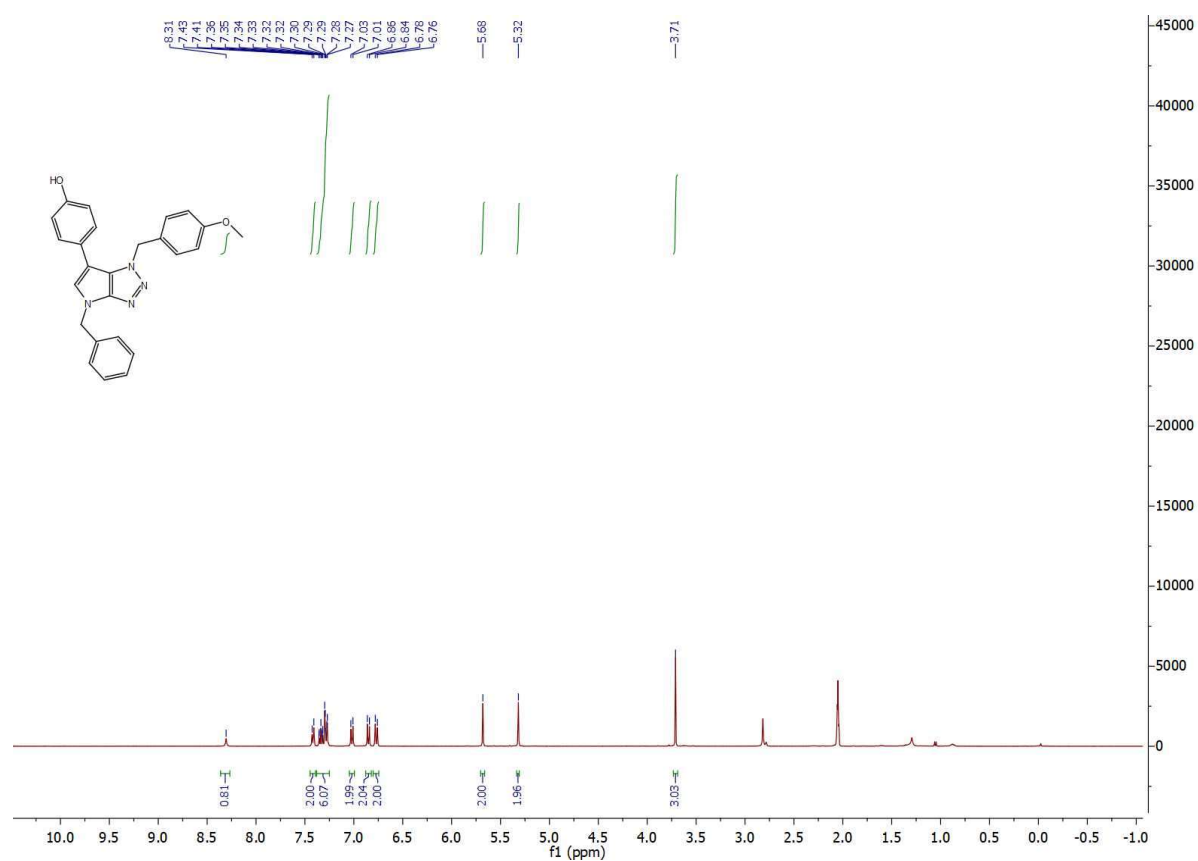

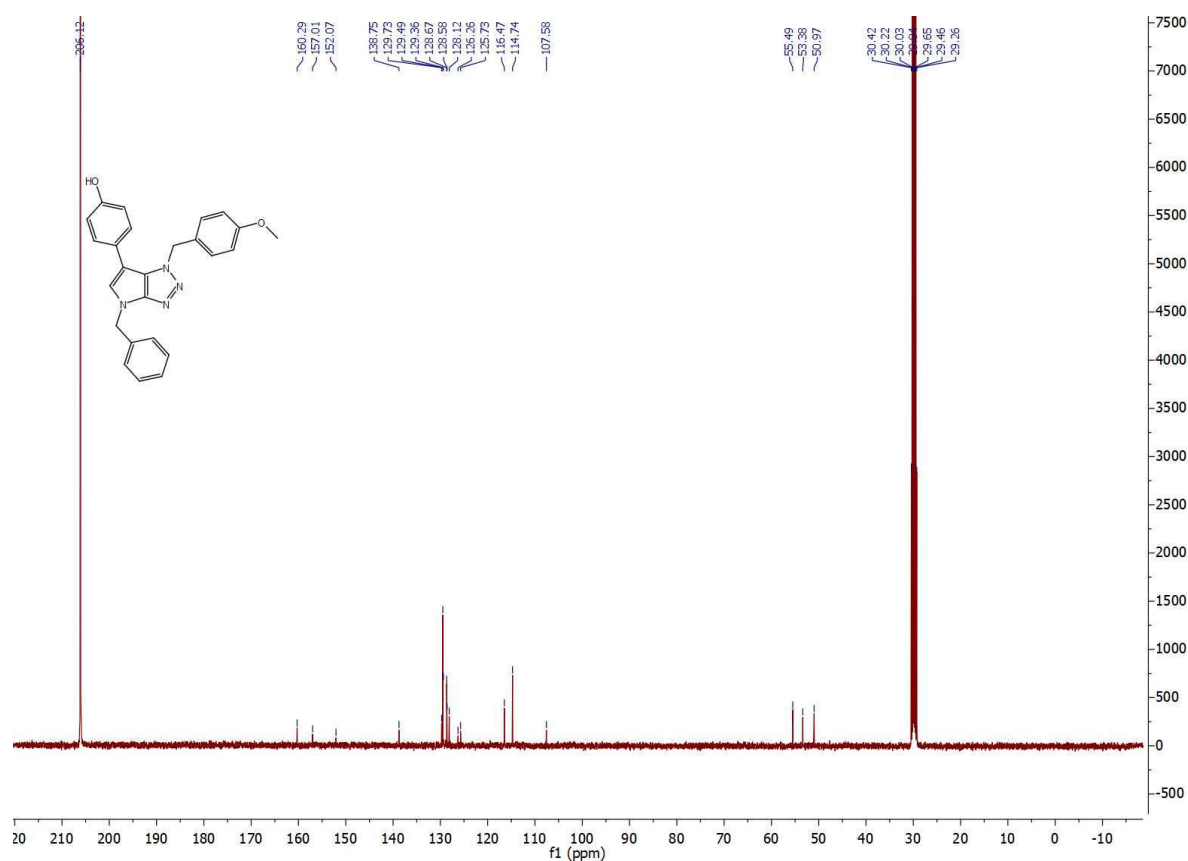

**Figure S25.** 4-(4-Benzyl-1-(4-methoxybenzyl)-1,4-dihydropyrrolo[2,3-*d*][1,2,3]triazol-6-yl)phenol (30).

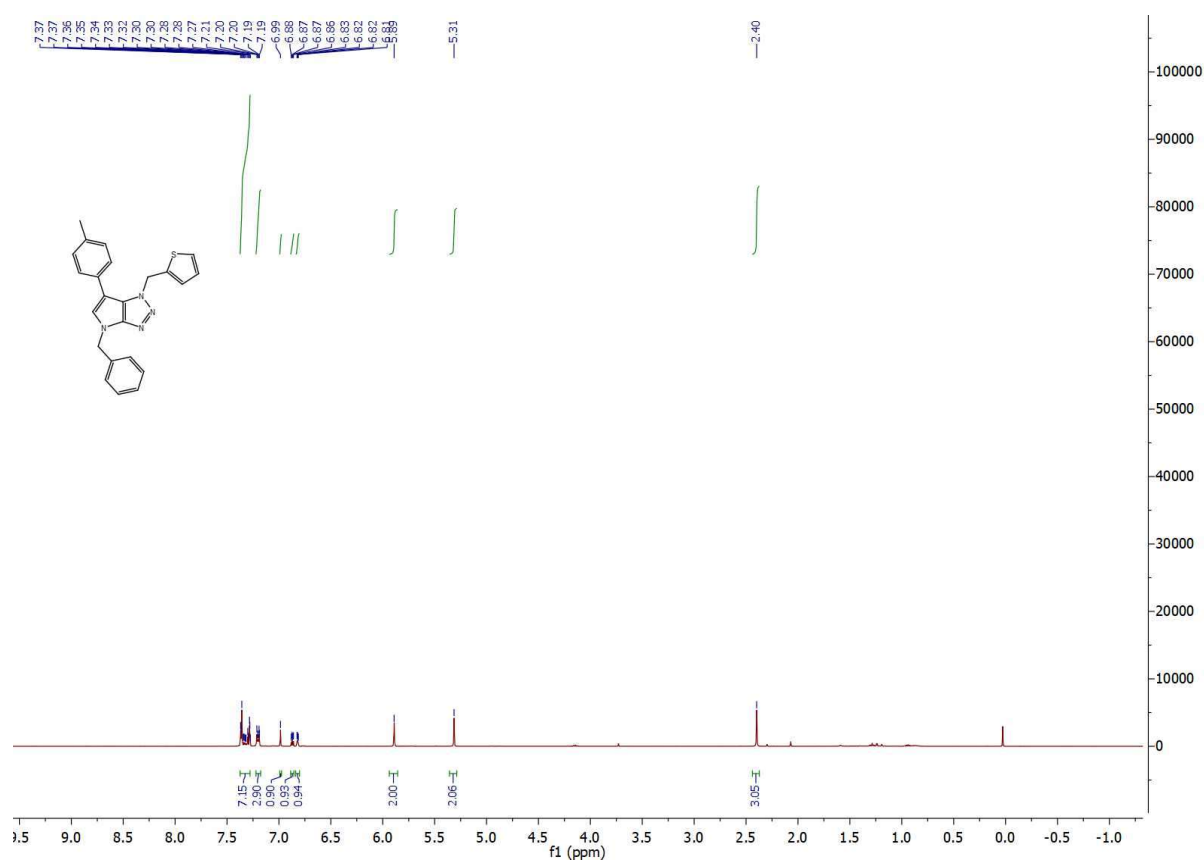

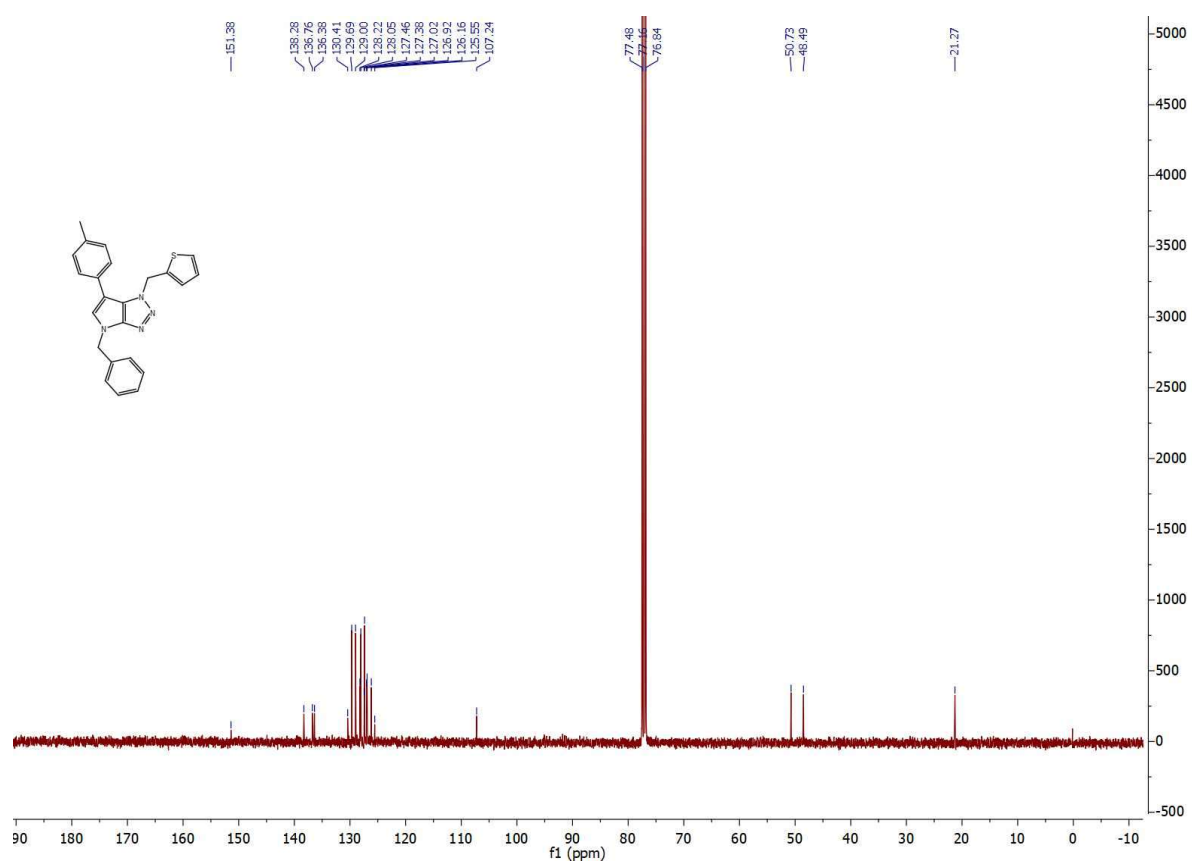

**Figure S26.** 4-Benzyl-1-(thiophen-2-ylmethyl)-6-(*p*-tolyl)-1,4-dihydropyrrolo[2,3-*d*][1,2,3]triazole (31).

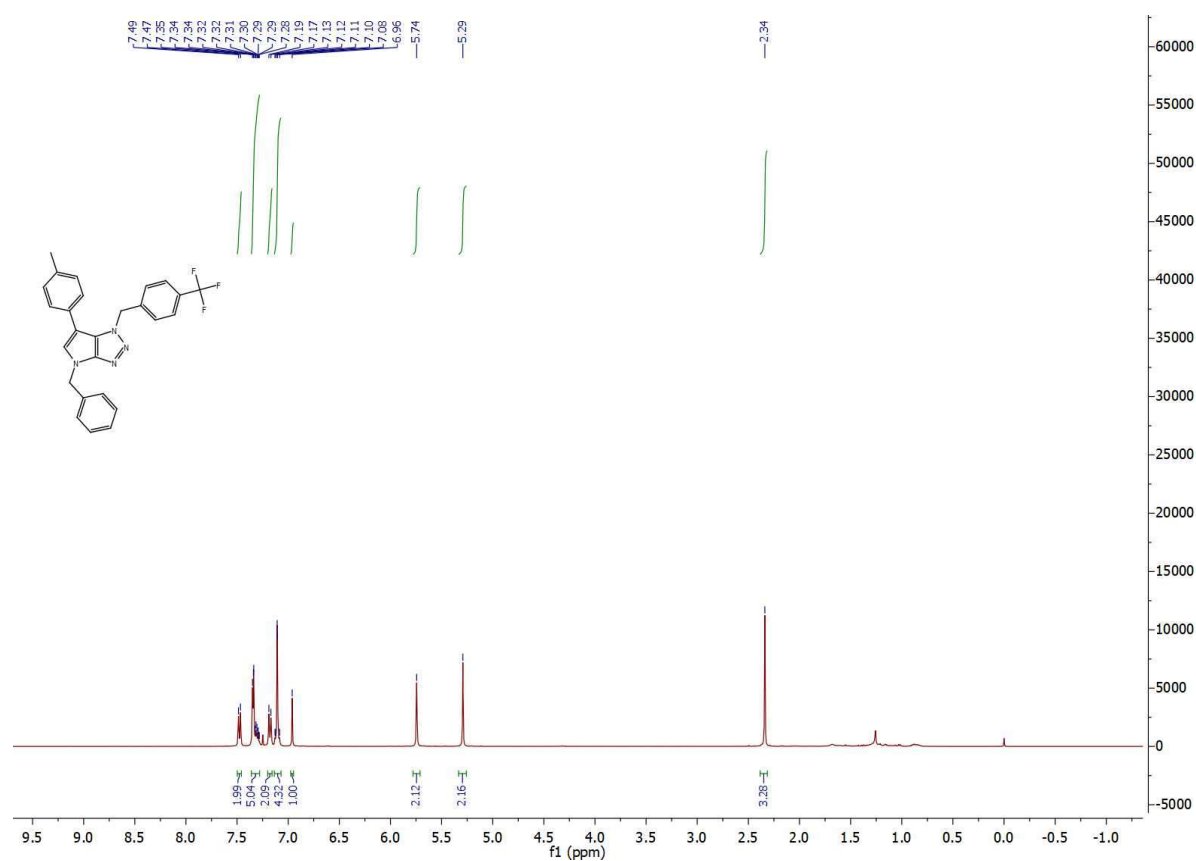

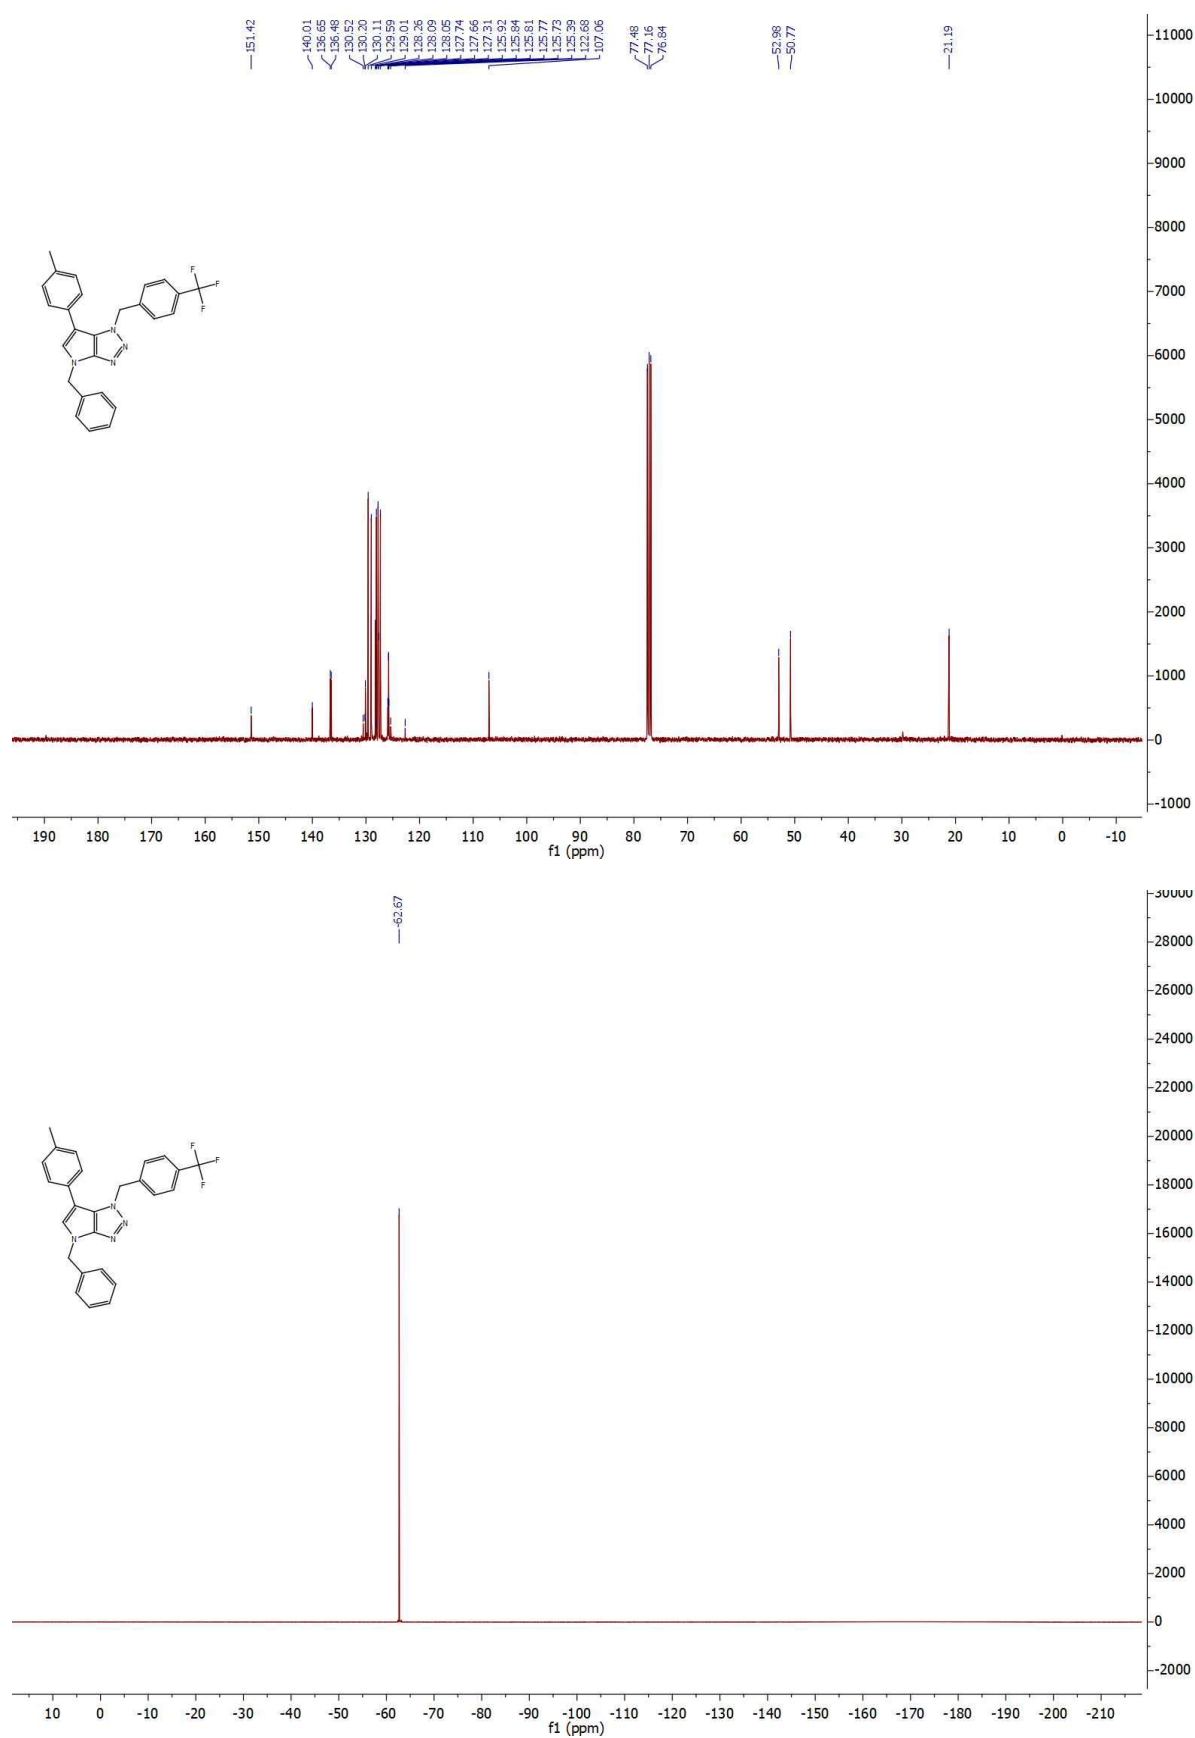

**Figure S27.** 4-Benzyl-6-(*p*-tolyl)-1-(4-(trifluoromethyl)benzyl)-1,4-dihydropyrrolo[2,3-*d*][1,2,3]triazole (32).

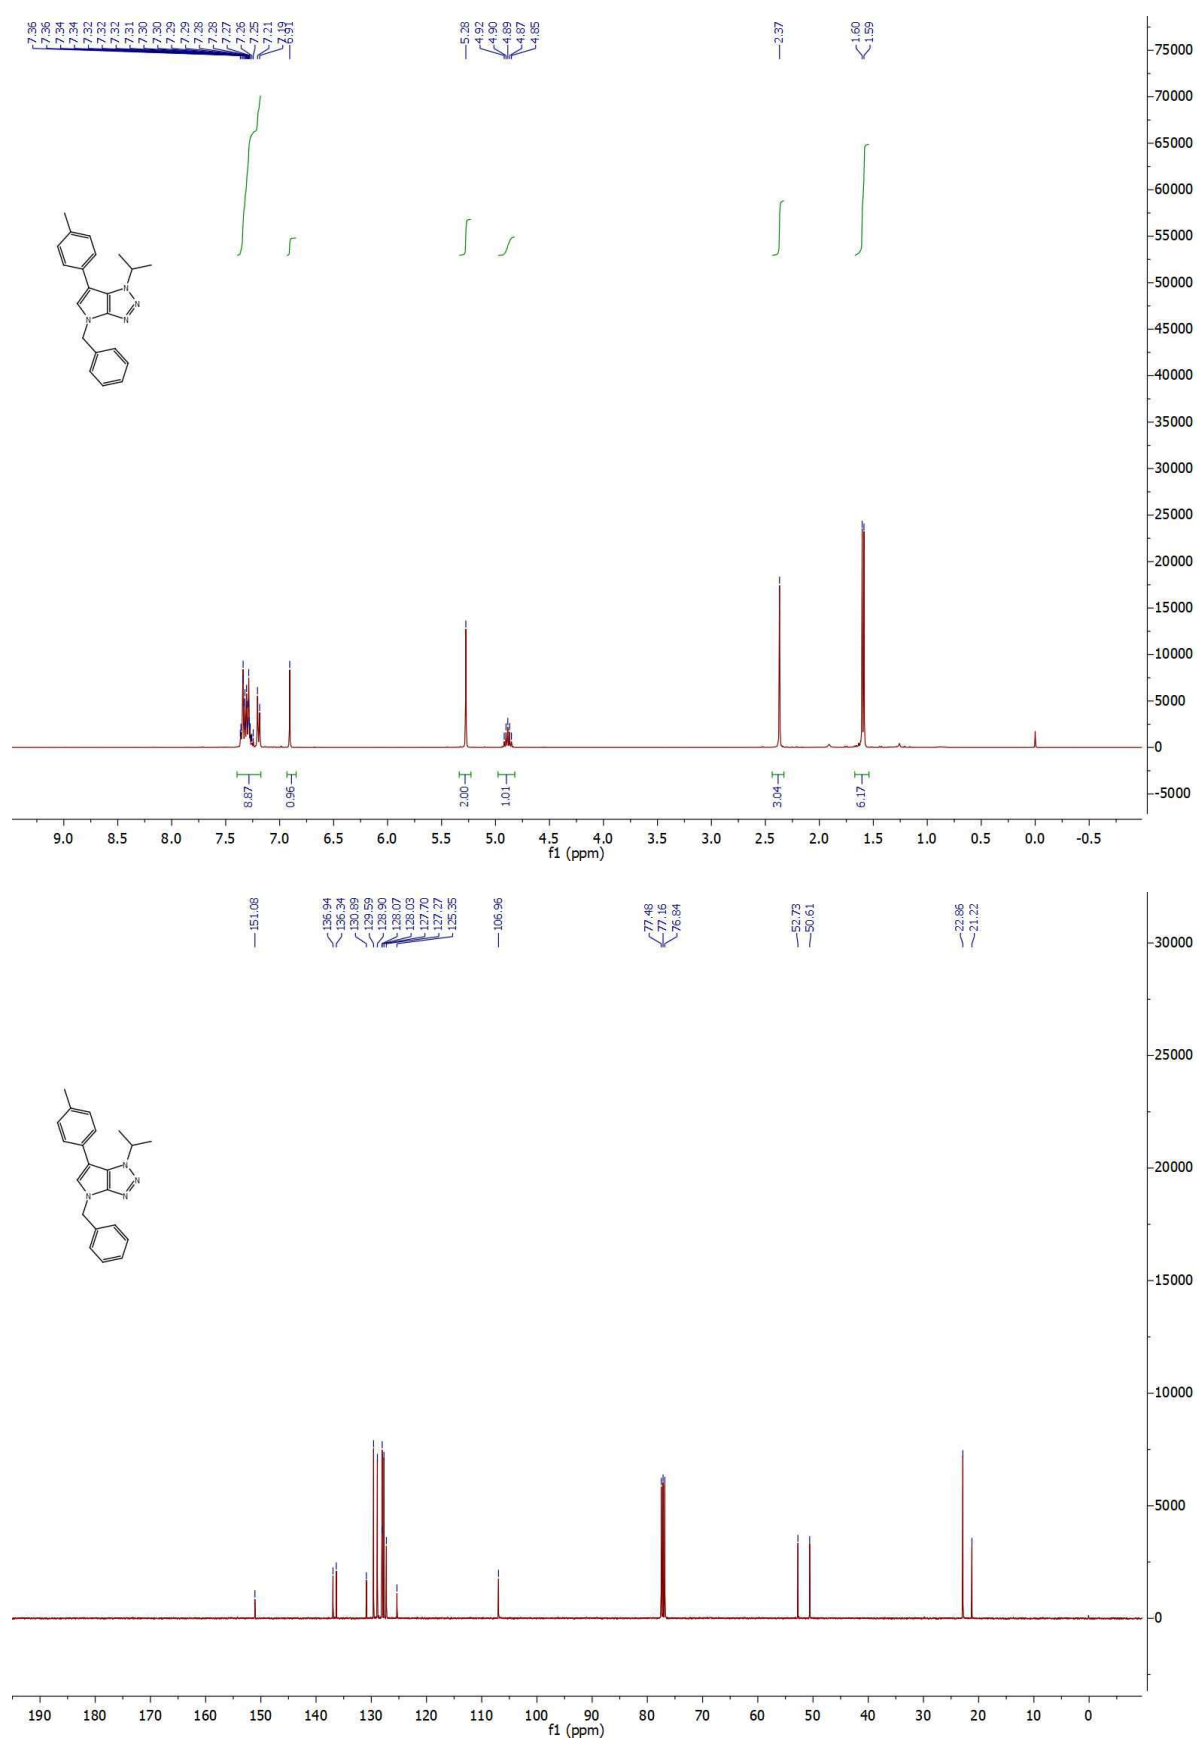

Figure S28. 4-Benzyl-1-isopropyl-6-(*p*-tolyl)-1,4-dihydropyrrolo[2,3-*d*][1,2,3]triazole (33).

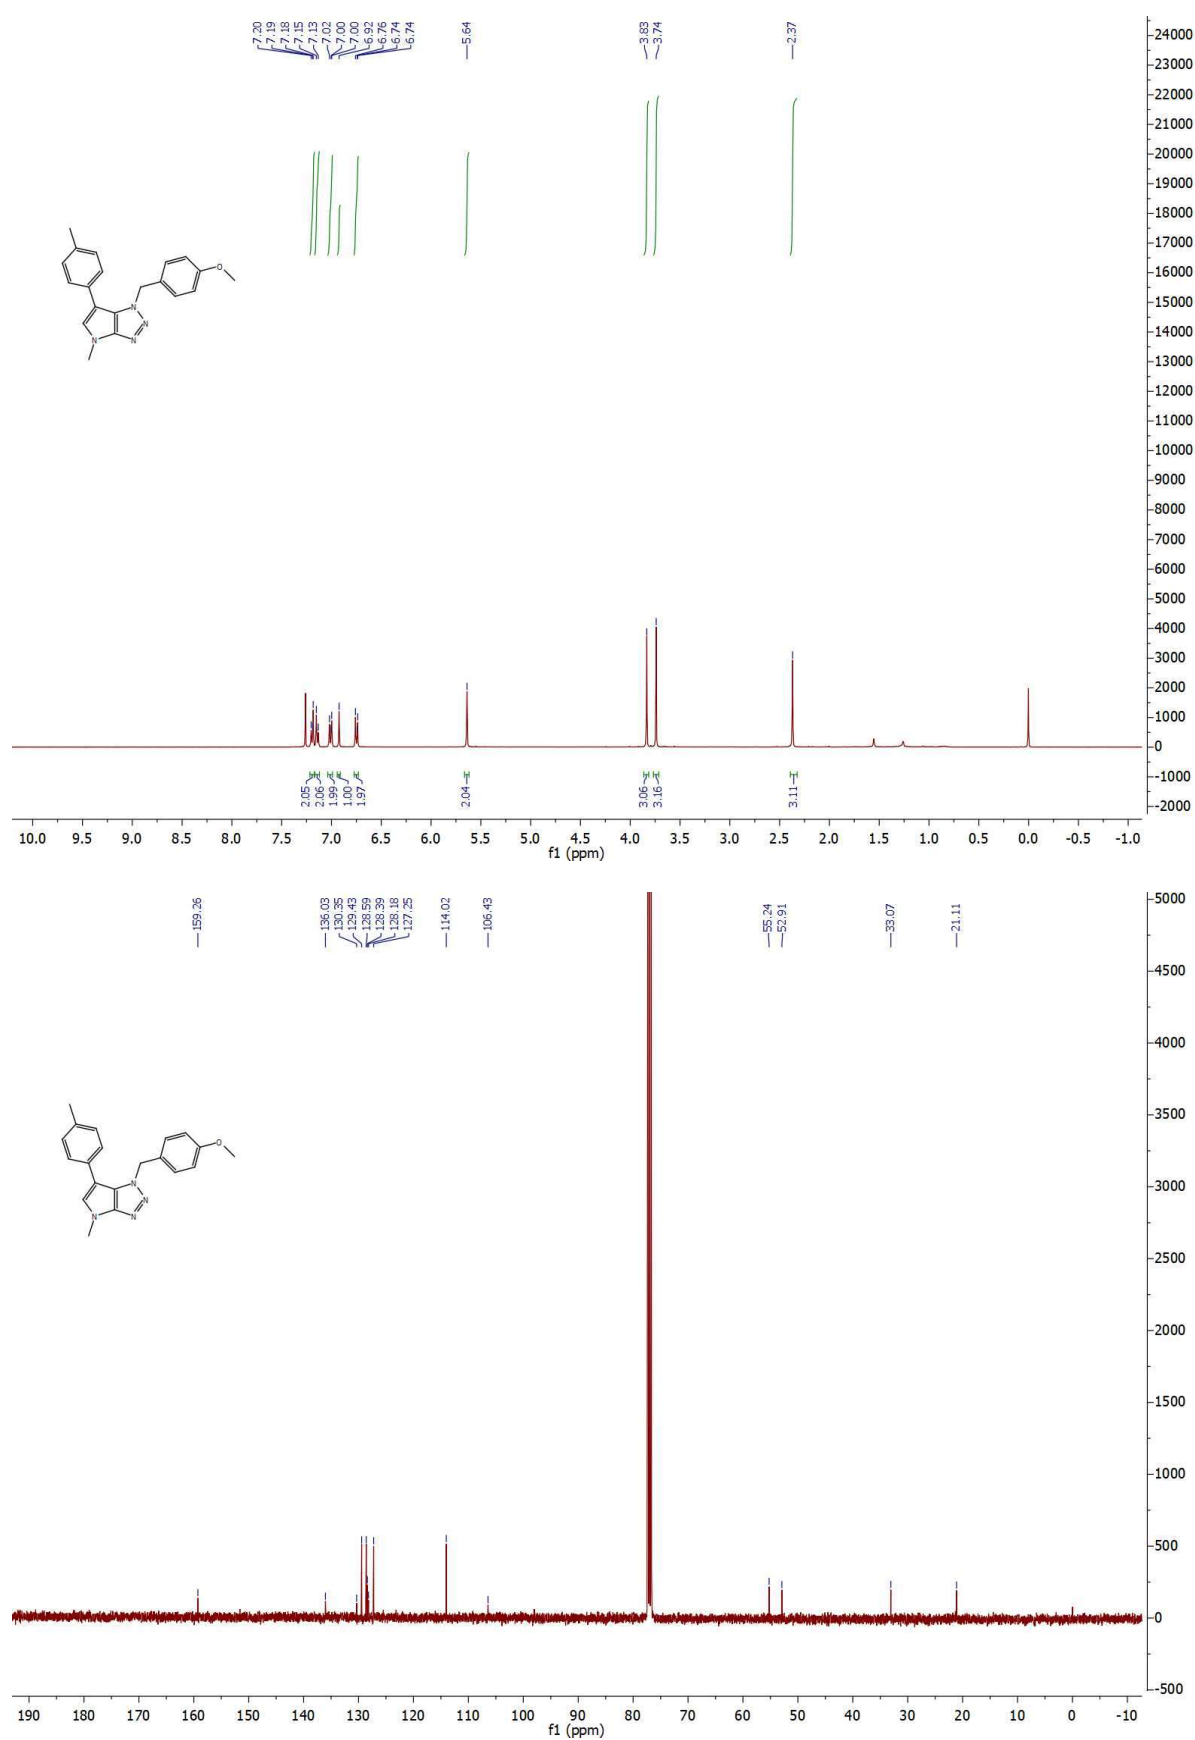

Figure S29. 1-(4-Methoxybenzyl)-4-methyl-6-(*p*-tolyl)-1,4-dihydropyrrolo[2,3-*d*][1,2,3]triazole (34).

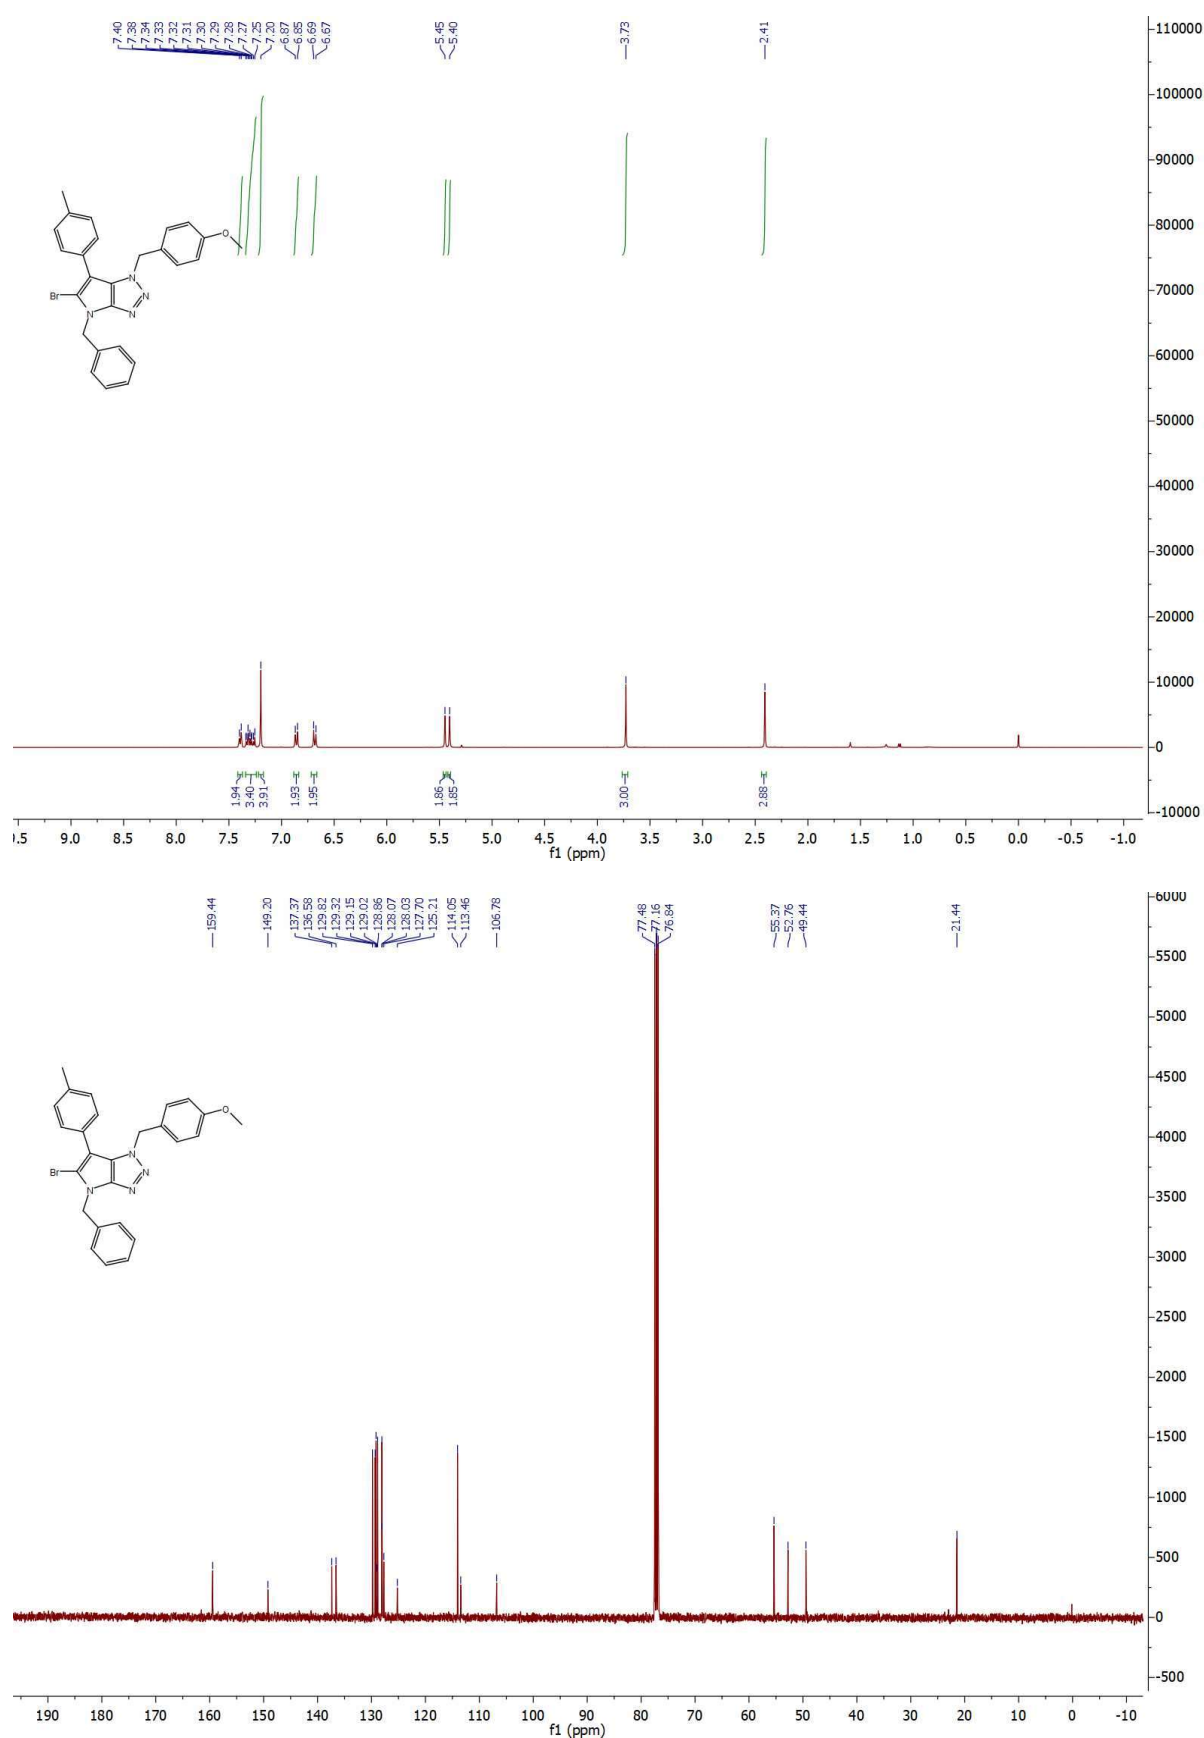

**Figure S30.** 4-Benzyl-5-bromo-1-(4-methoxybenzyl)-6-(*p*-tolyl)-1,4-dihydropyrrolo[2,3-*d*][1,2,3]triazole (35).

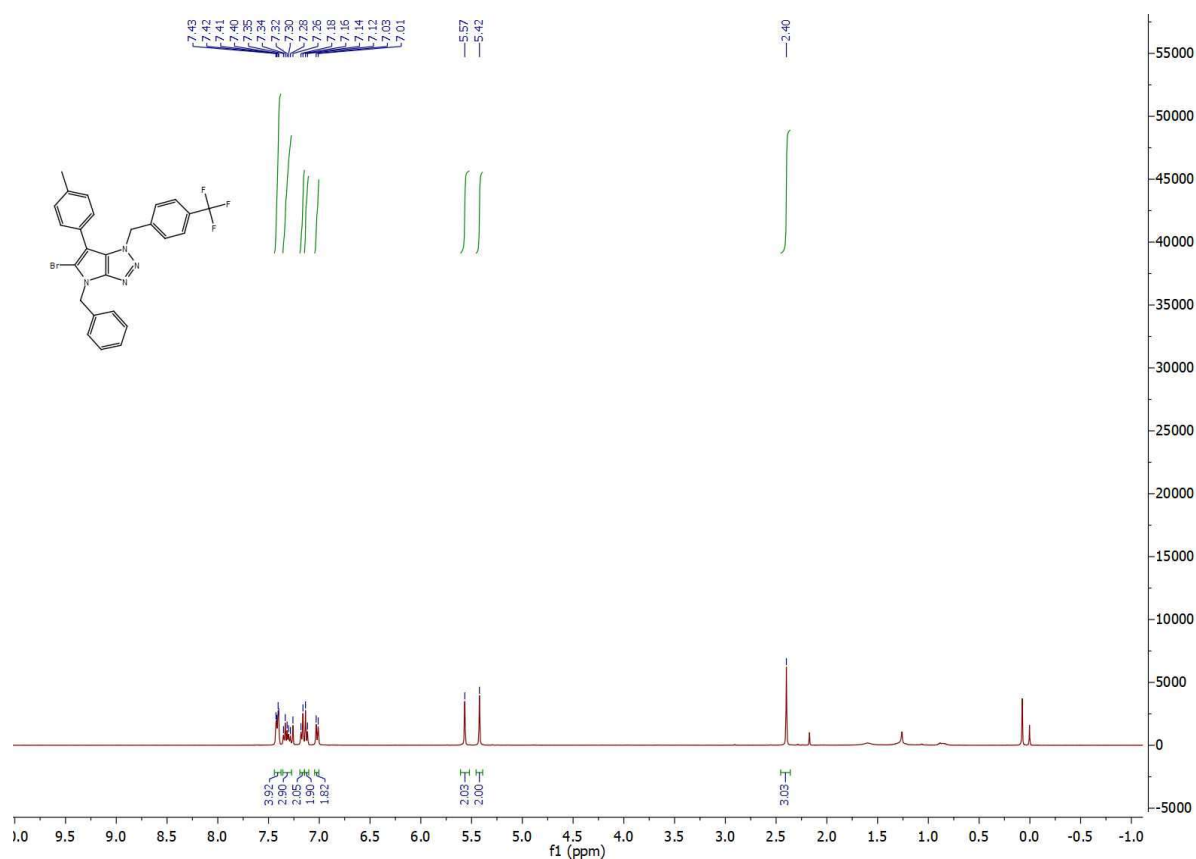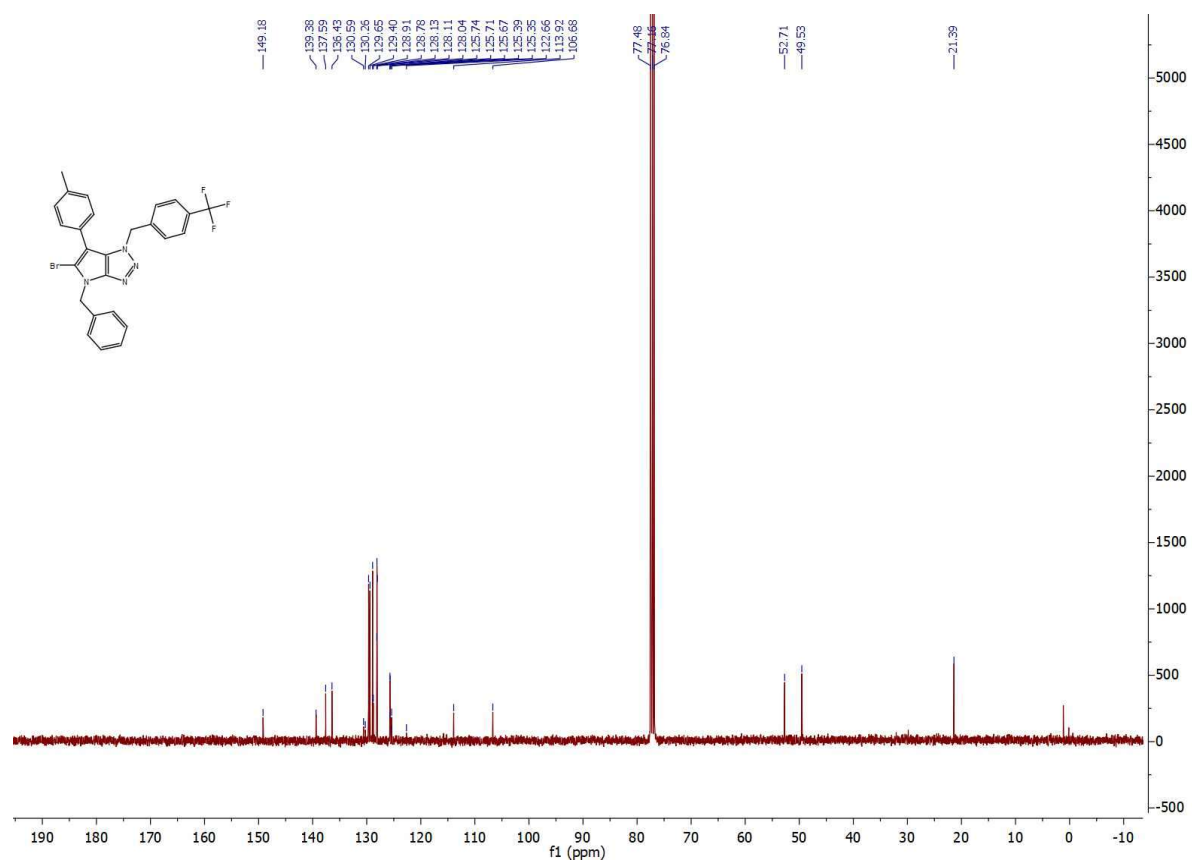

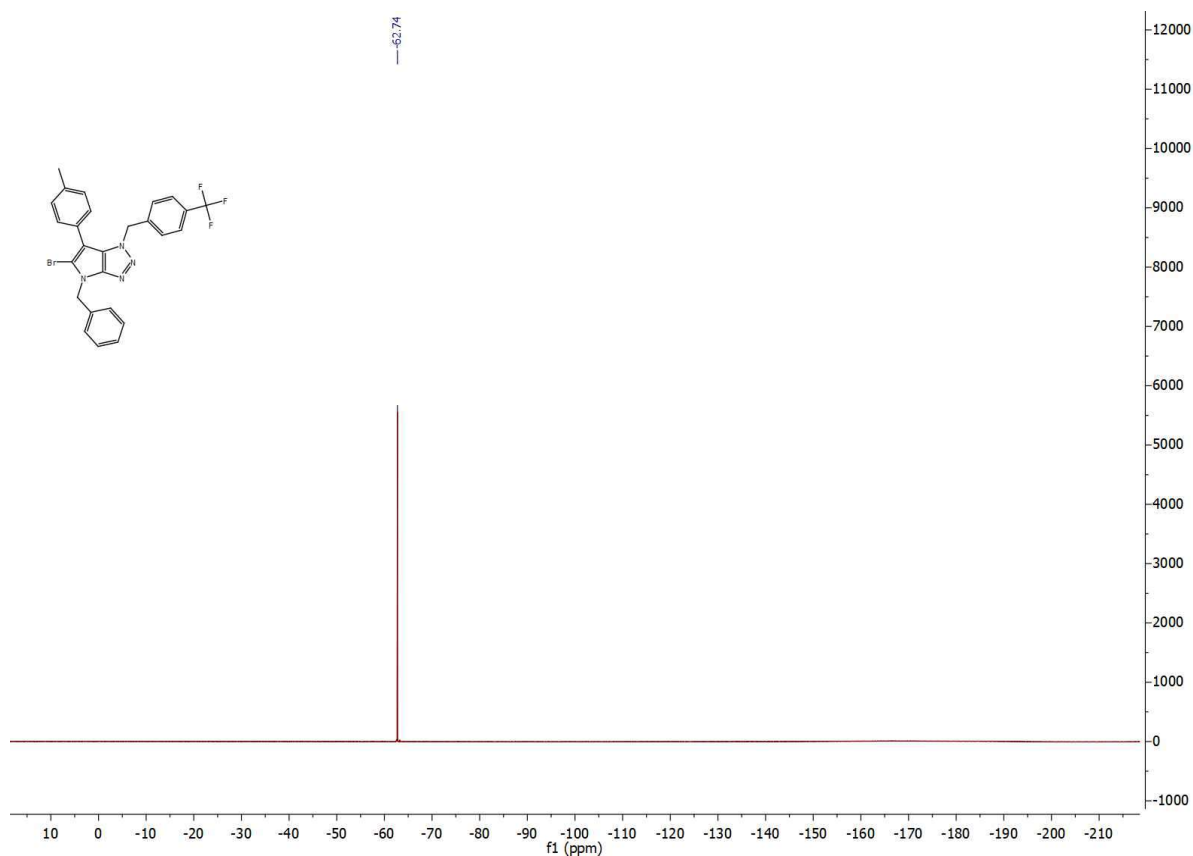

**Figure S31.** 4-Benzyl-5-bromo-6-(*p*-tolyl)-1-(4-(trifluoromethyl)benzyl)-1,4-dihydropyrrolo[2,3-*d*][1,2,3]triazole (36).

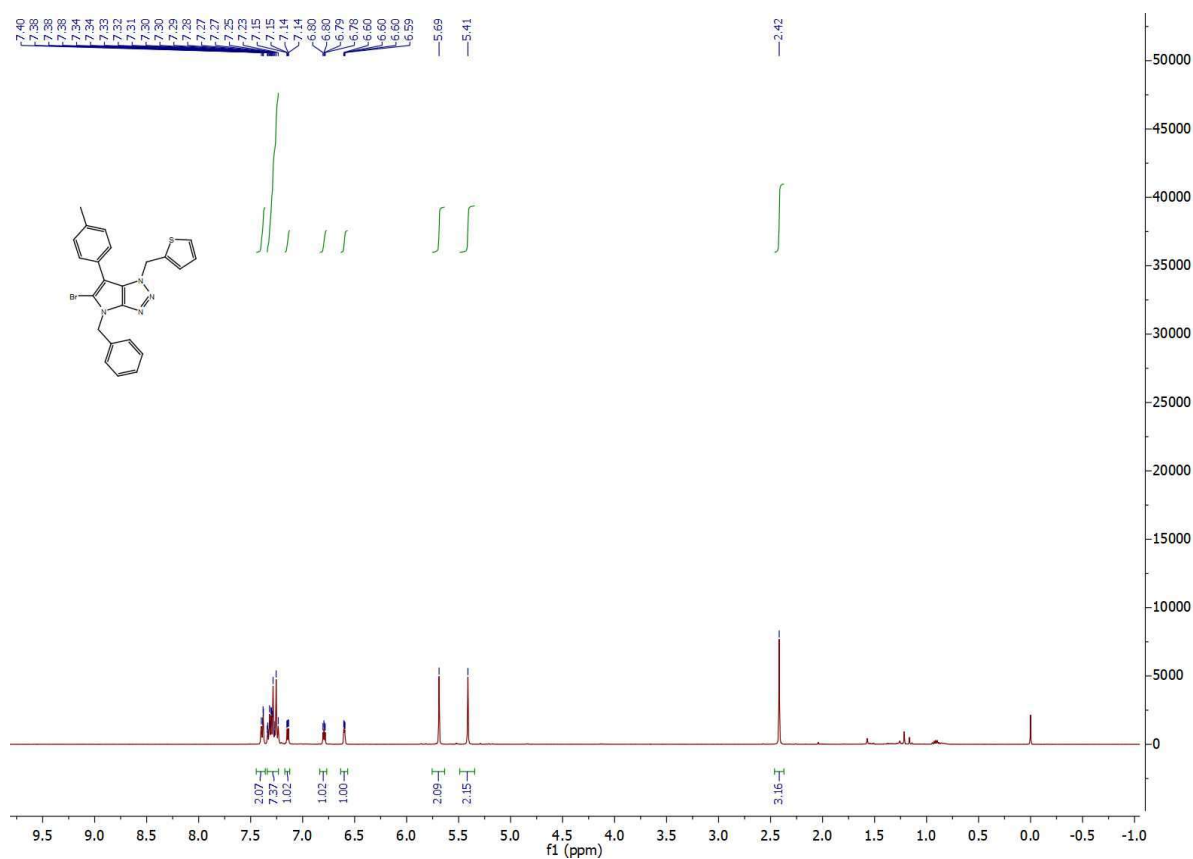

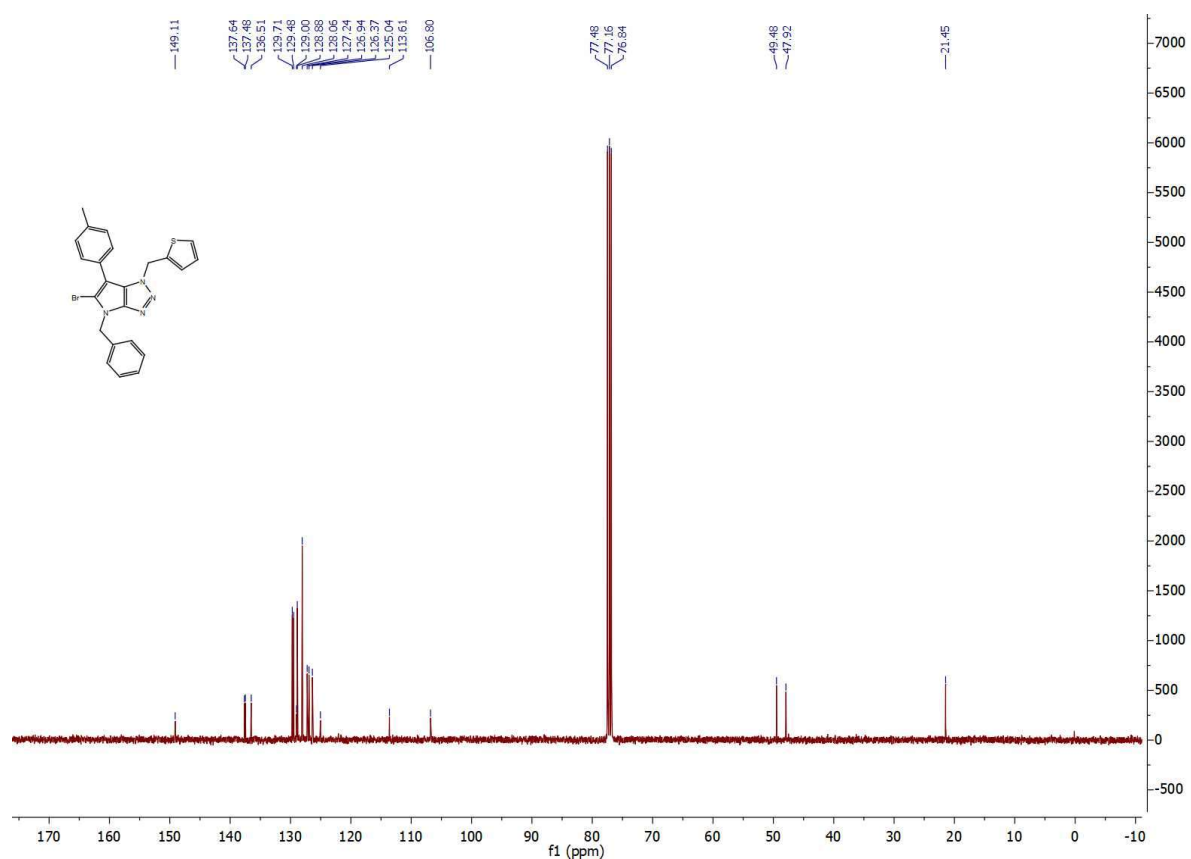

**Figure S32.** 4-Benzyl-5-bromo-1-(thiophen-2-ylmethyl)-6-(*p*-tolyl)-1,4-dihydropyrrolo[2,3-*d*][1,2,3]triazole (37).

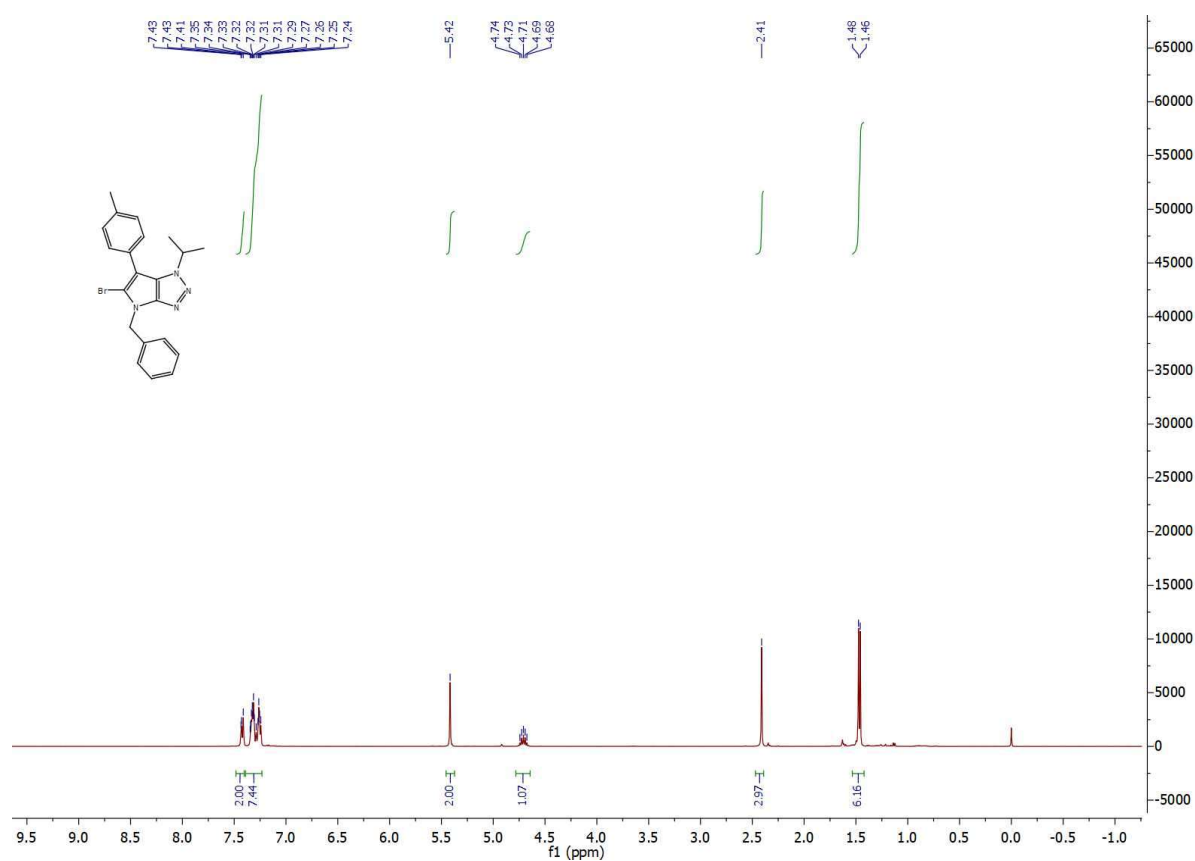

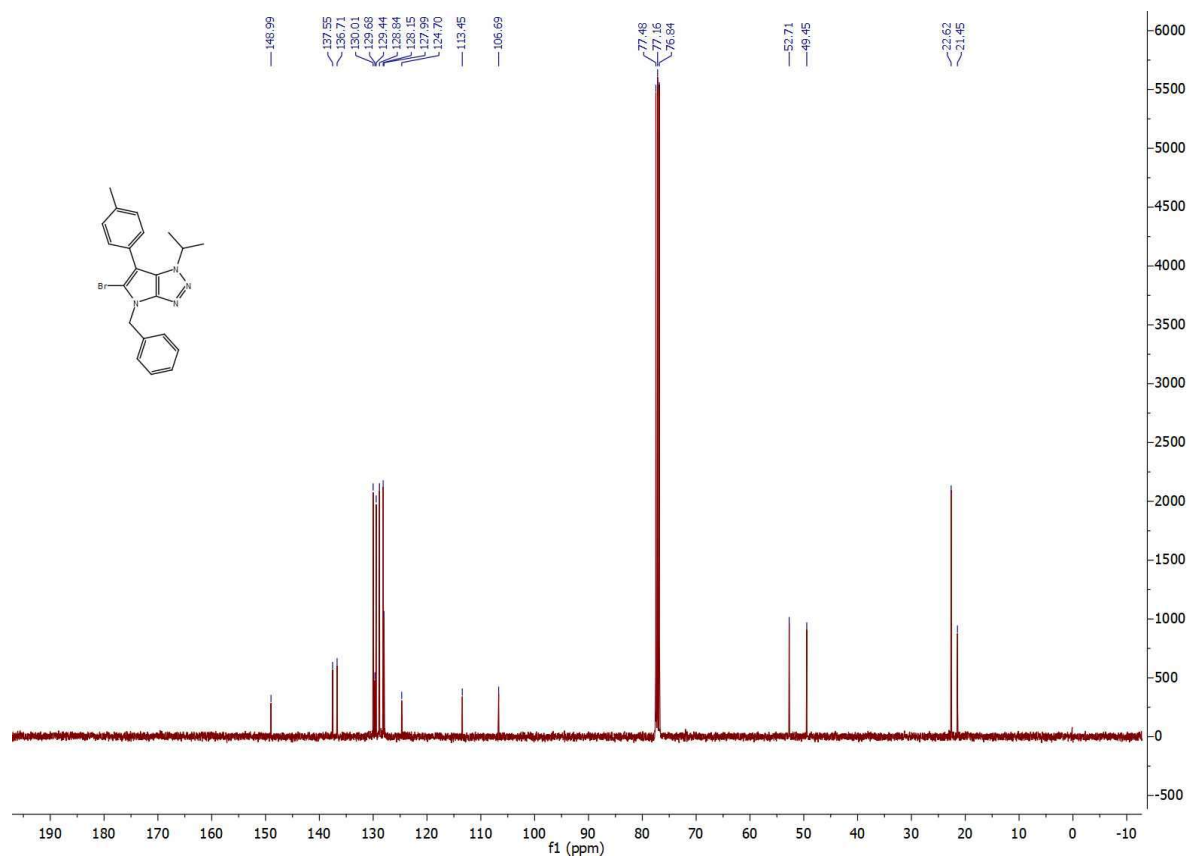

Figure S33. 4-Benzyl-5-bromo-1-isopropyl-6-(*p*-tolyl)-1,4-dihydropyrrolo[2,3-*d*][1,2,3]triazole (38).

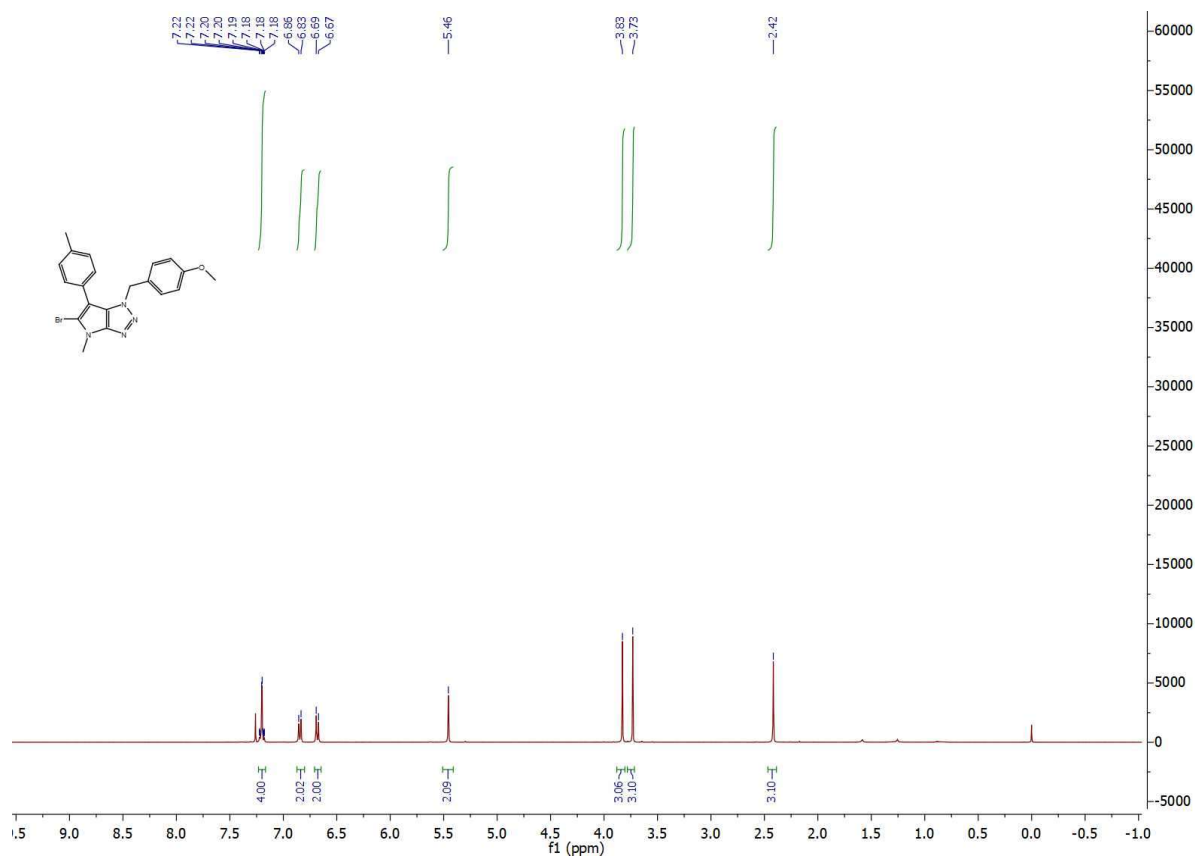

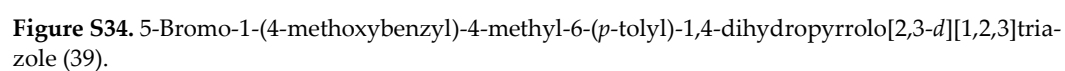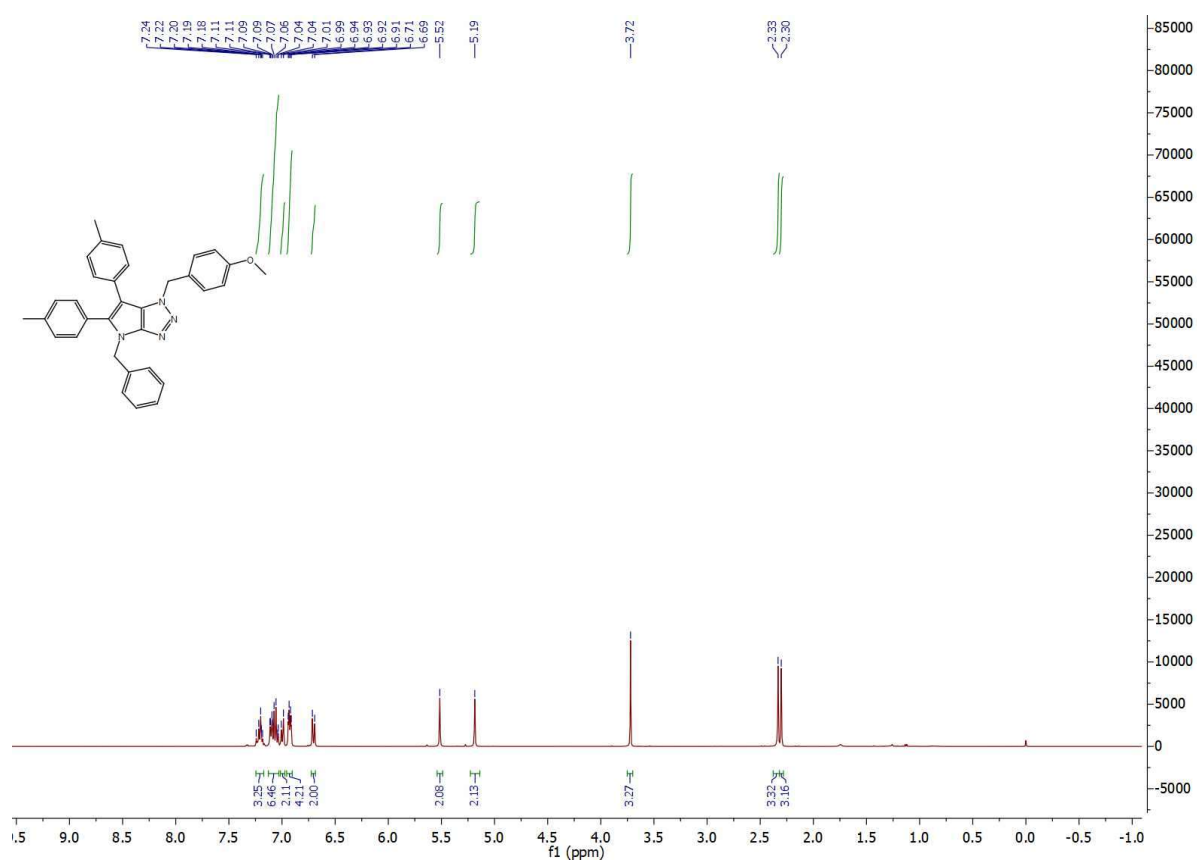

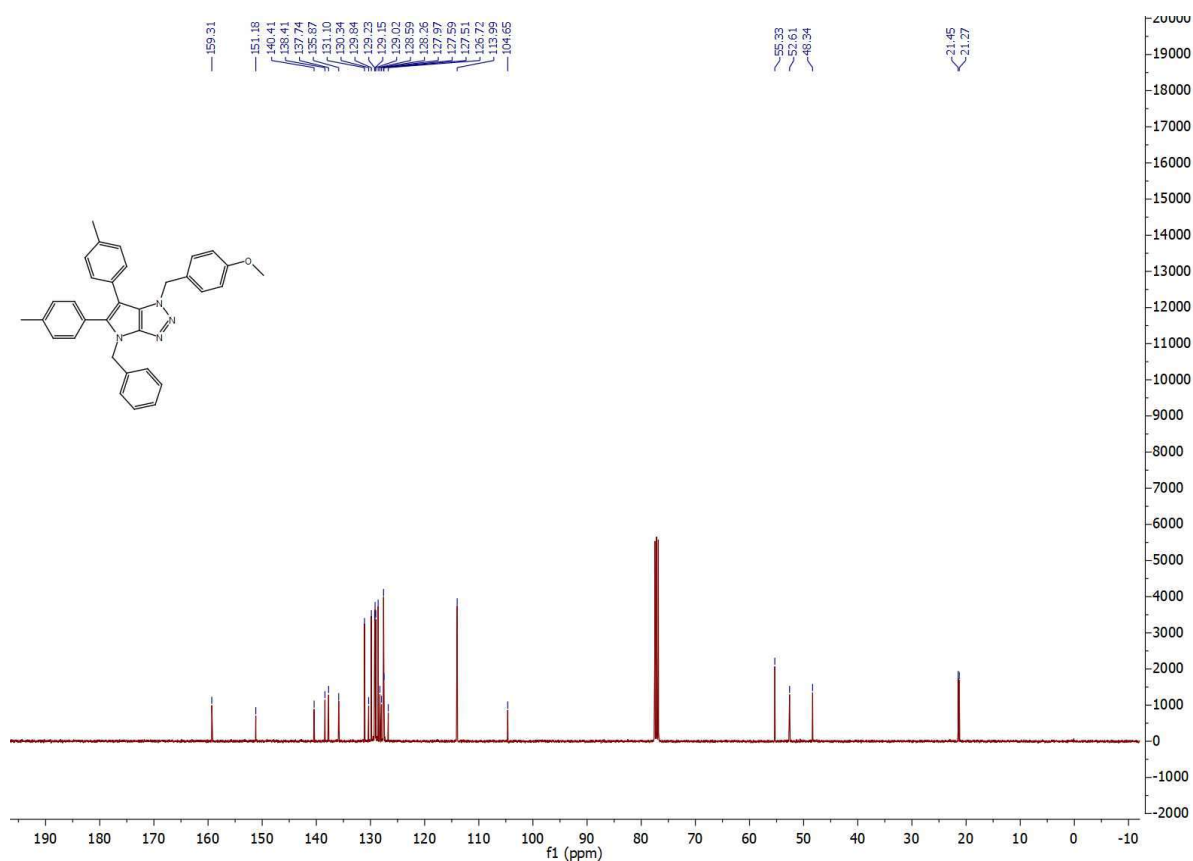

**Figure S35.** 4-Benzyl-1-(4-methoxybenzyl)-5,6-di-*p*-tolyl-1,4-dihydropyrrolo[2,3-*d*][1,2,3]triazole (40).

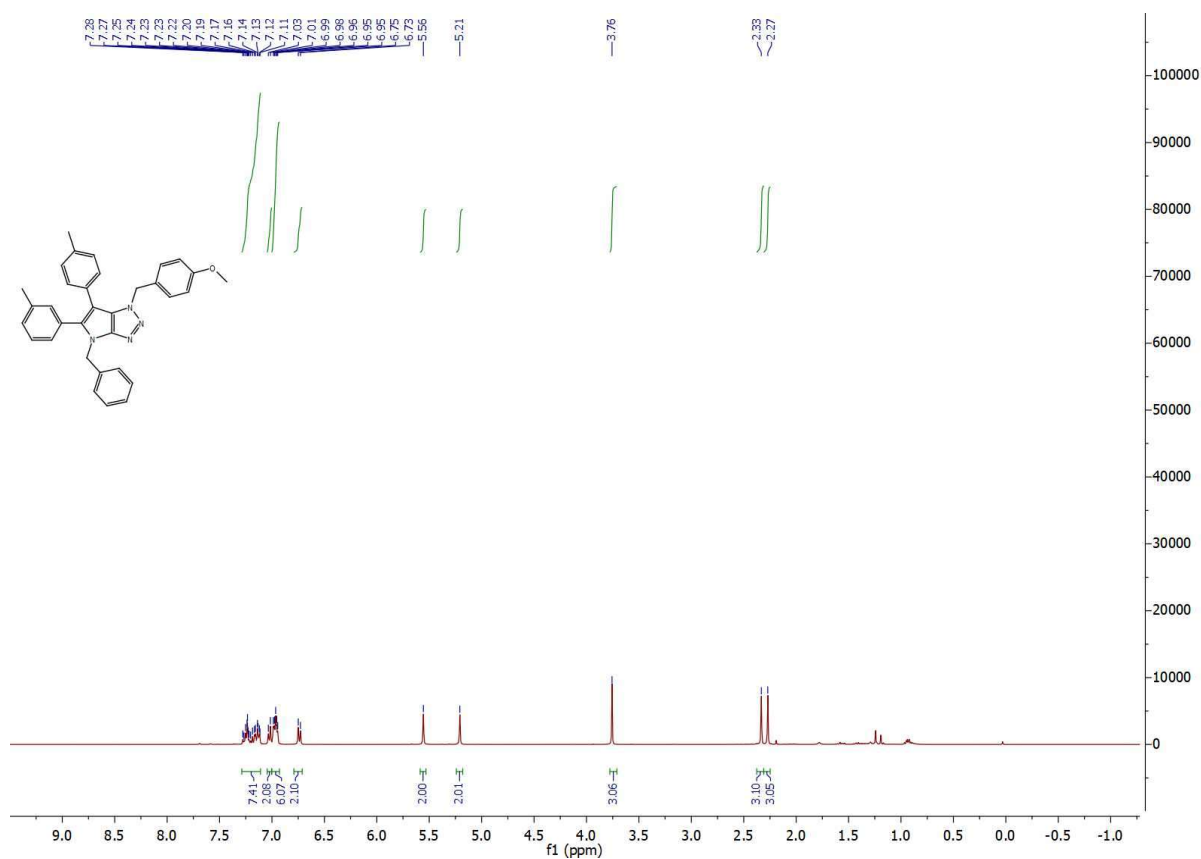

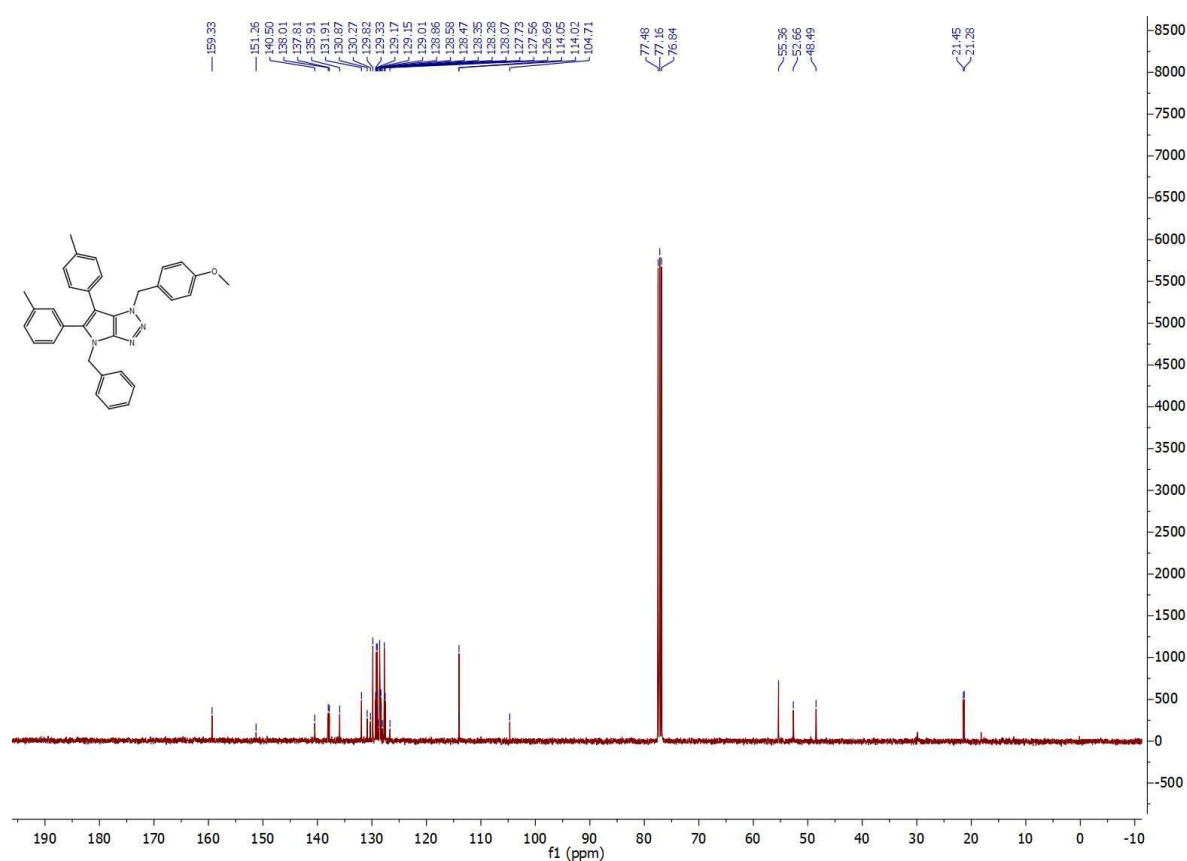

**Figure S36.** 4-Benzyl-1-(4-methoxybenzyl)-5-(*m*-tolyl)-6-(*p*-tolyl)-1,4-dihydropyrrolo[2,3-*d*][1,2,3]triazole (41).

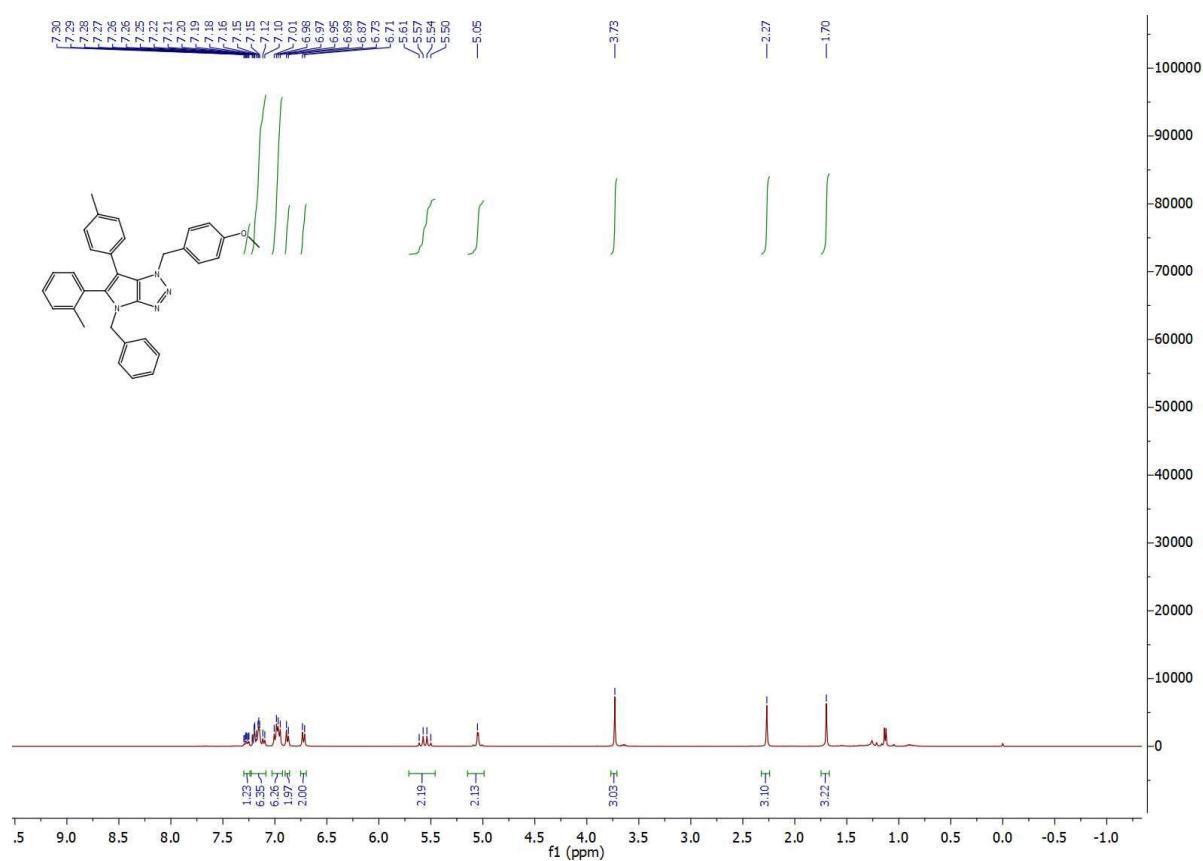

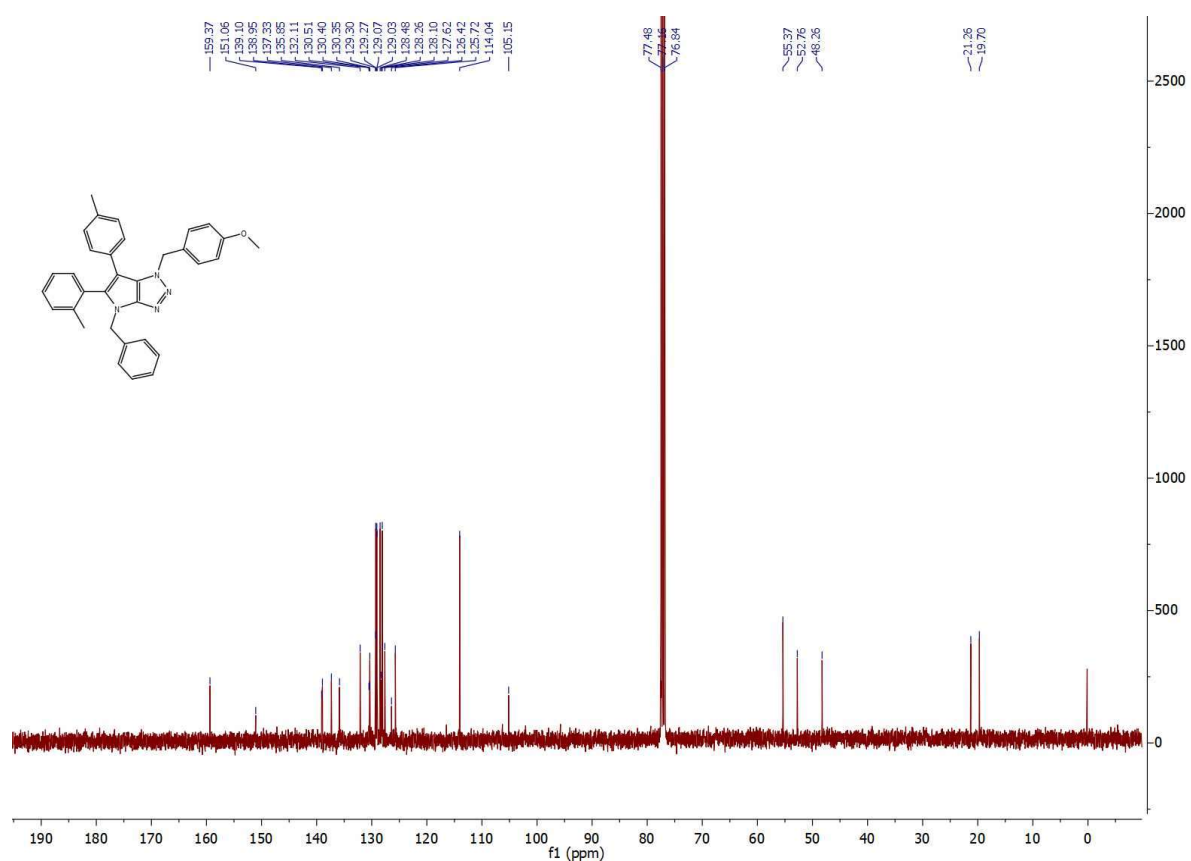

Figure S37. 4-Benzyl-1-(4-methoxybenzyl)-5-(*o*-tolyl)-6-(*p*-tolyl)-1,4-dihydropyrrolo[2,3-*d*][1,2,3]triazole (42).

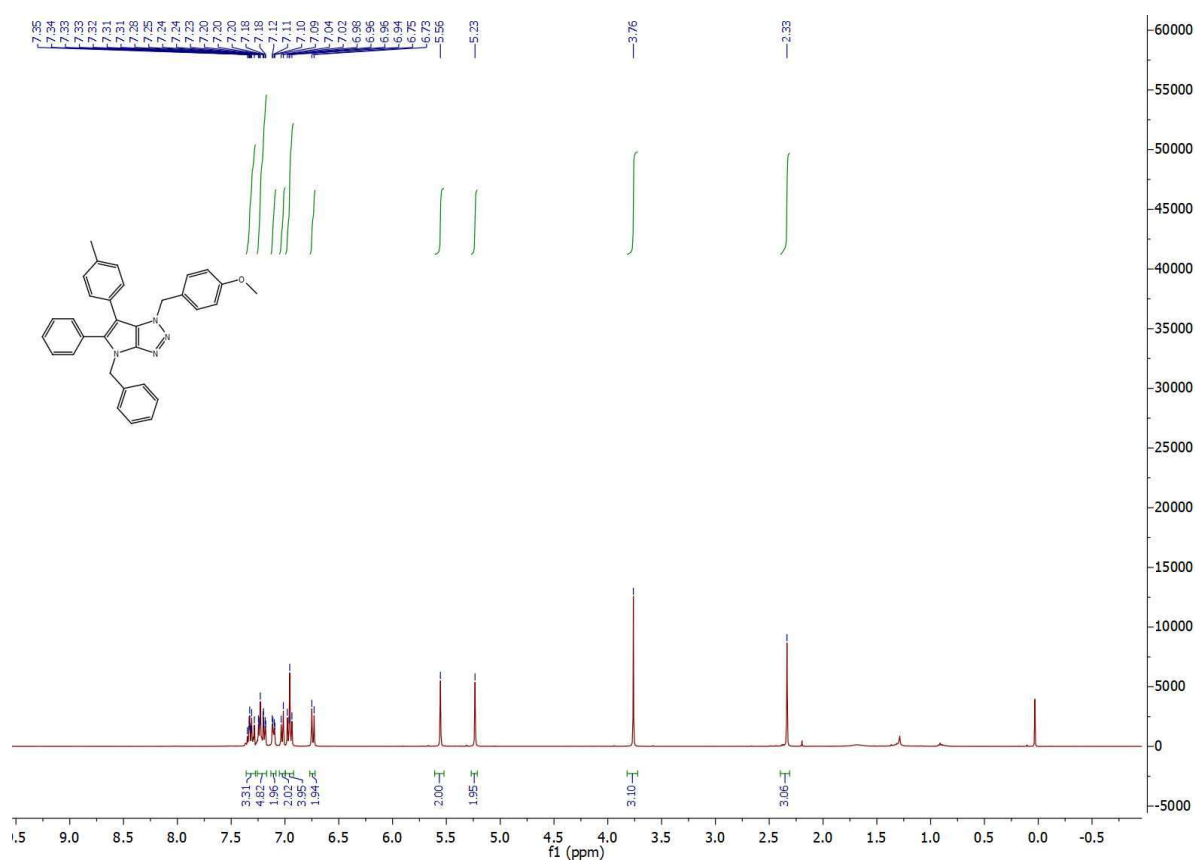

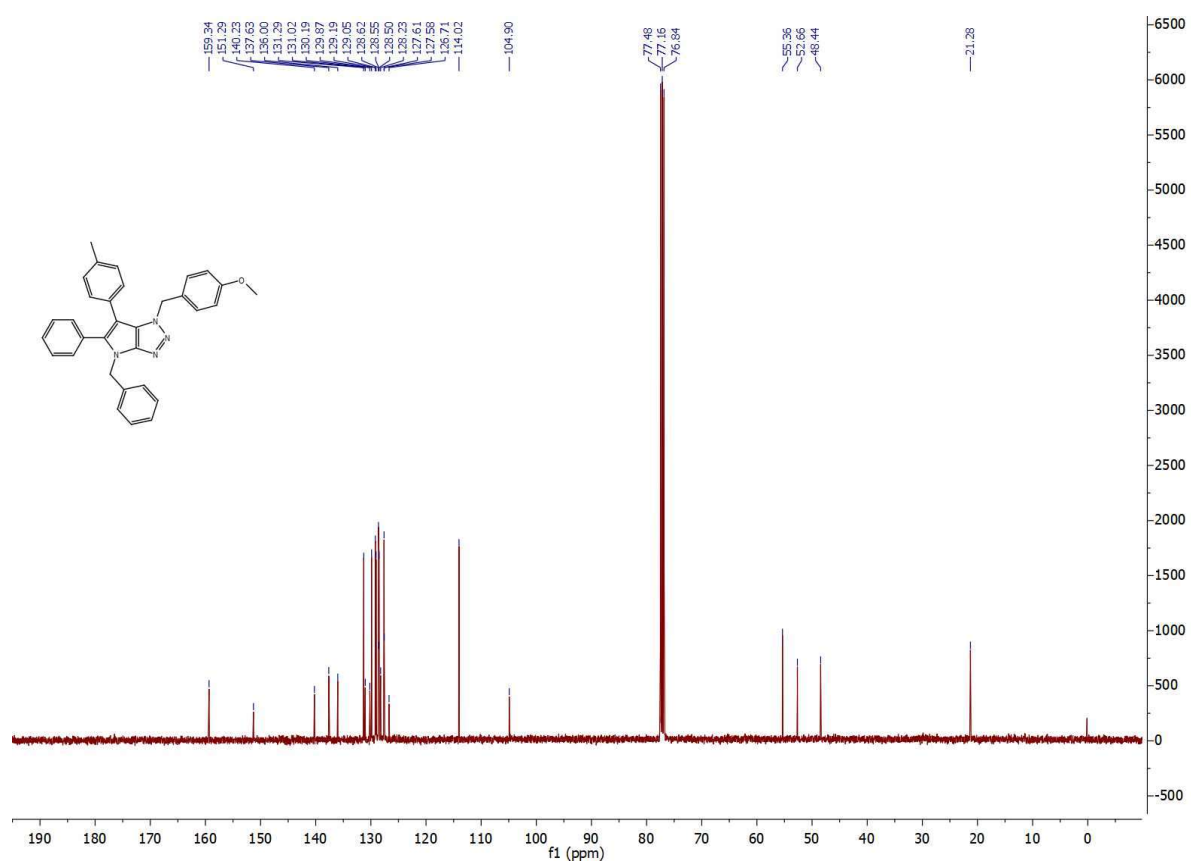

**Figure S38.** 4-(Benzyl-1-(4-methoxybenzyl)-5-phenyl-6-(*p*-tolyl)-1,4-dihydropyrrolo[2,3-*d*][1,2,3]triazole (43).

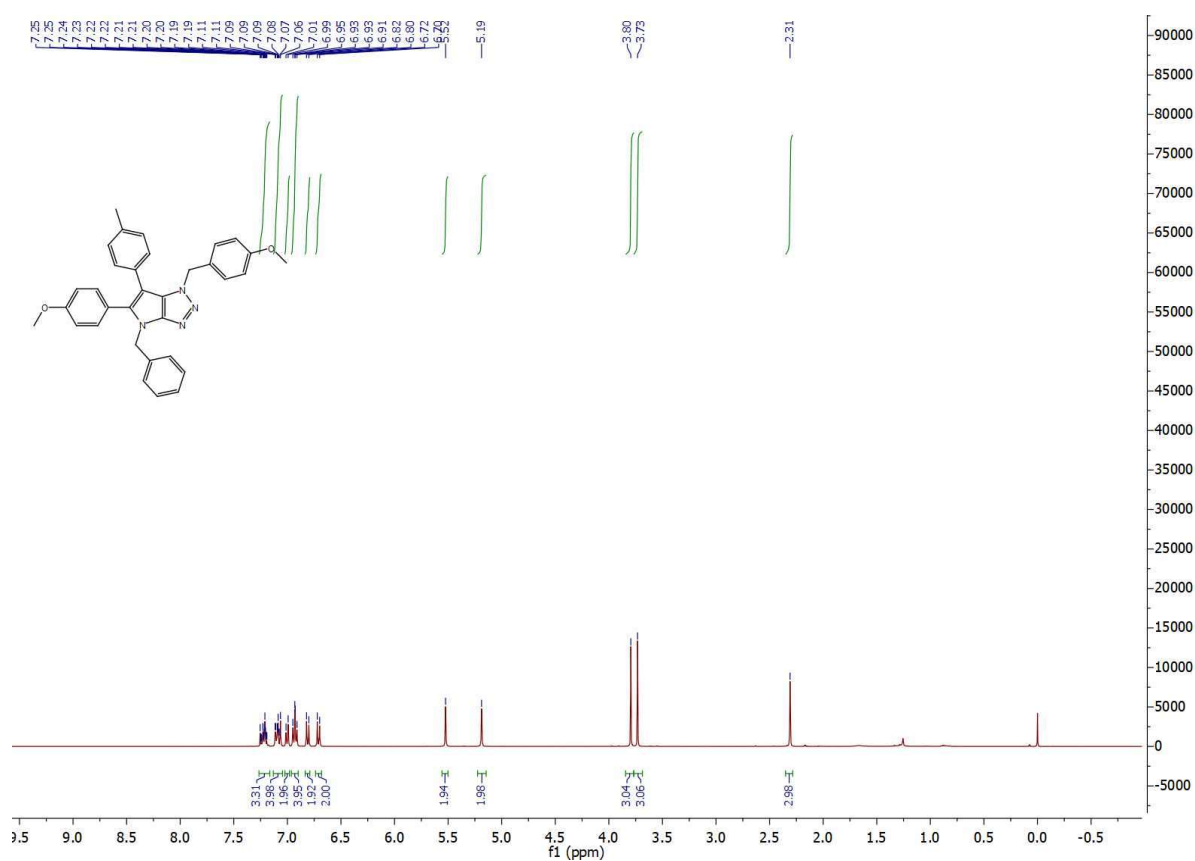

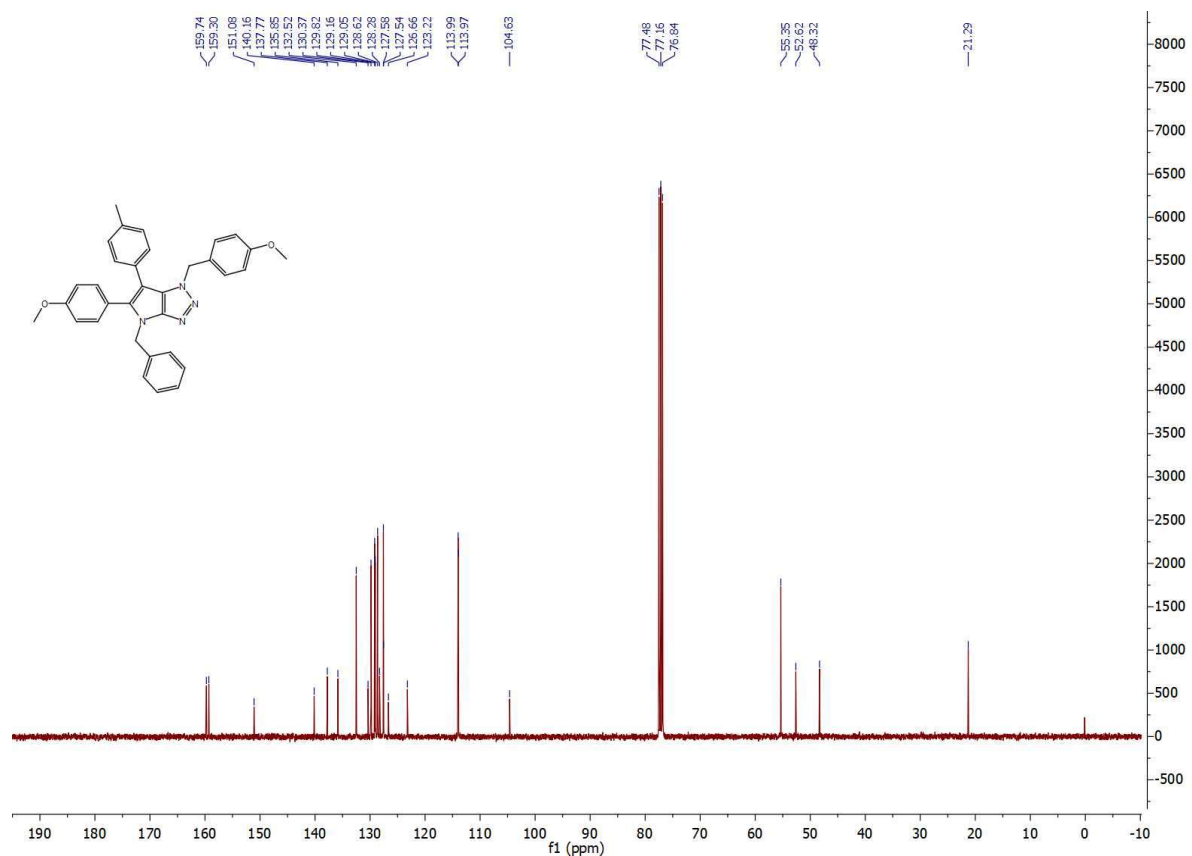

**Figure S39.** 4-(Benzyl-1-(4-methoxybenzyl)-5-(4-methoxyphenyl)-6-(*p*-tolyl)-1,4-dihydro-pyrrolo[2,3-*d*][1,2,3]triazole (44).

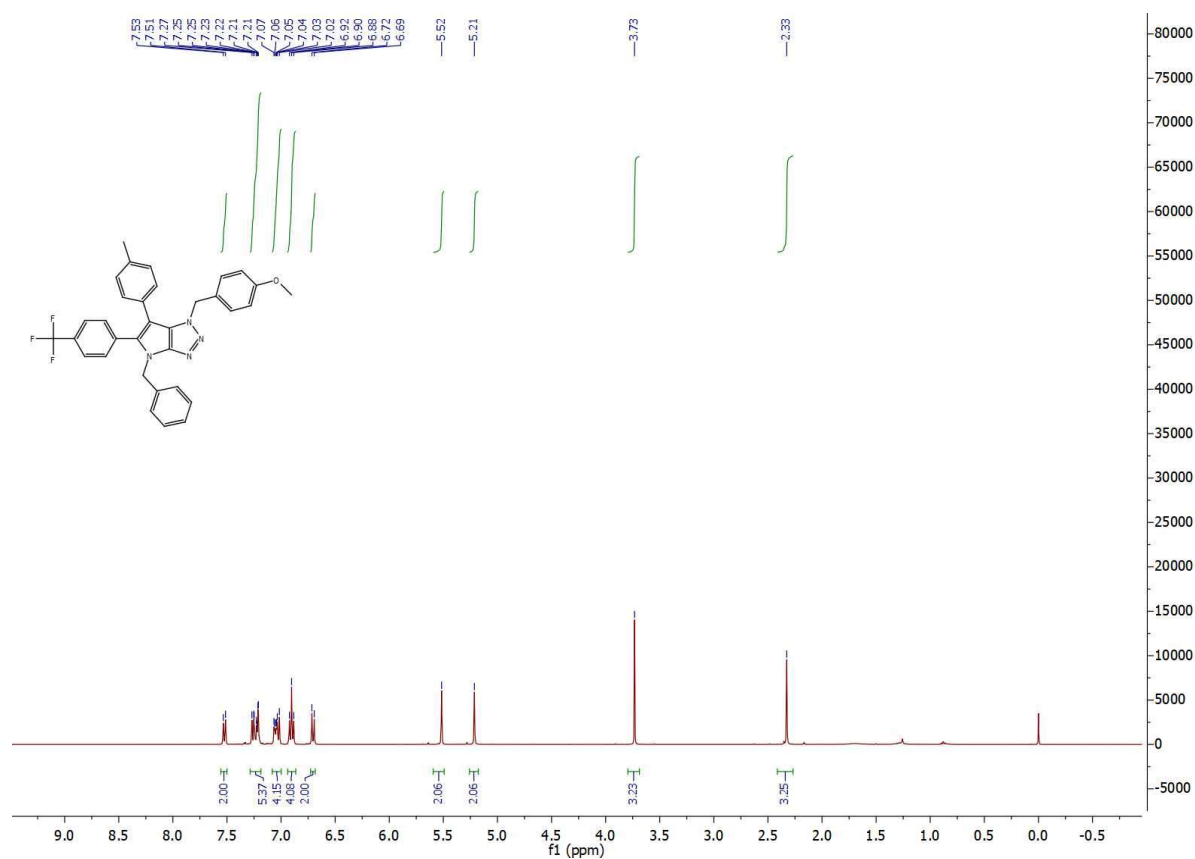

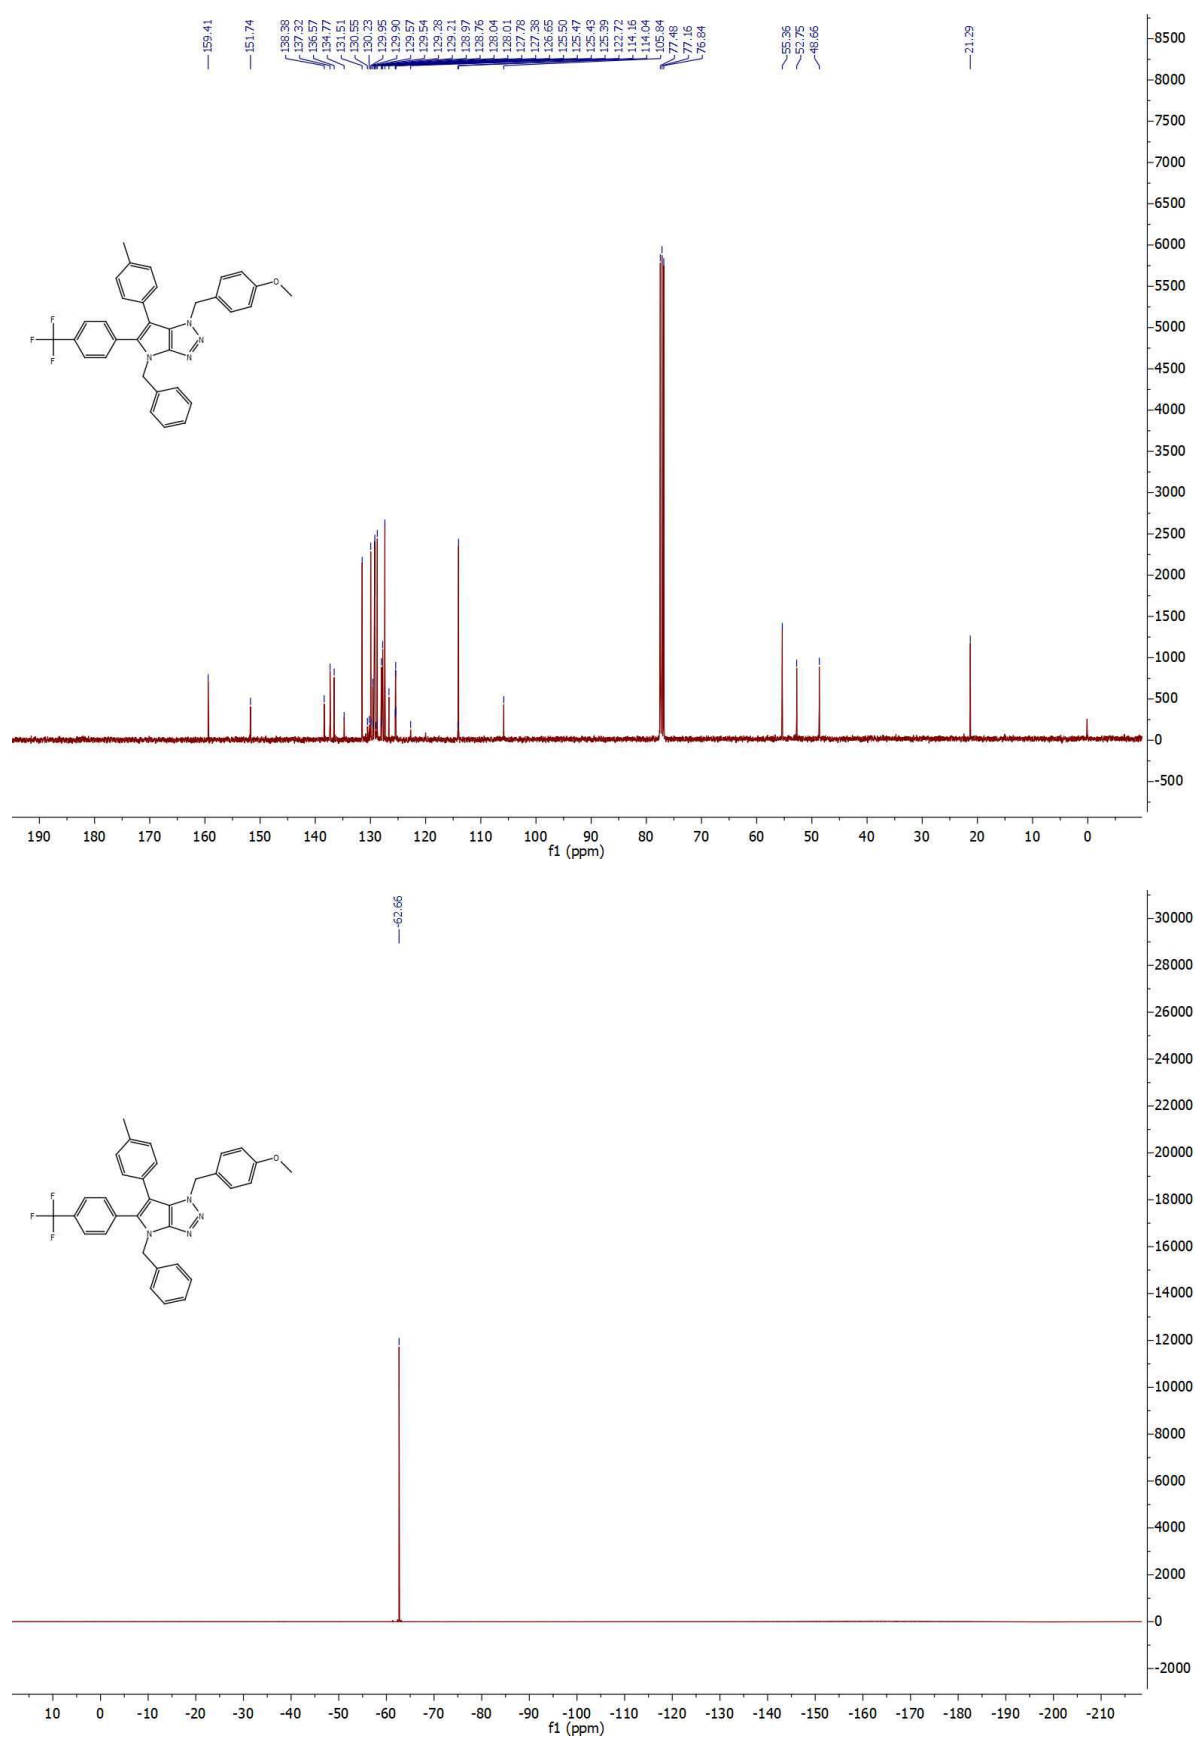

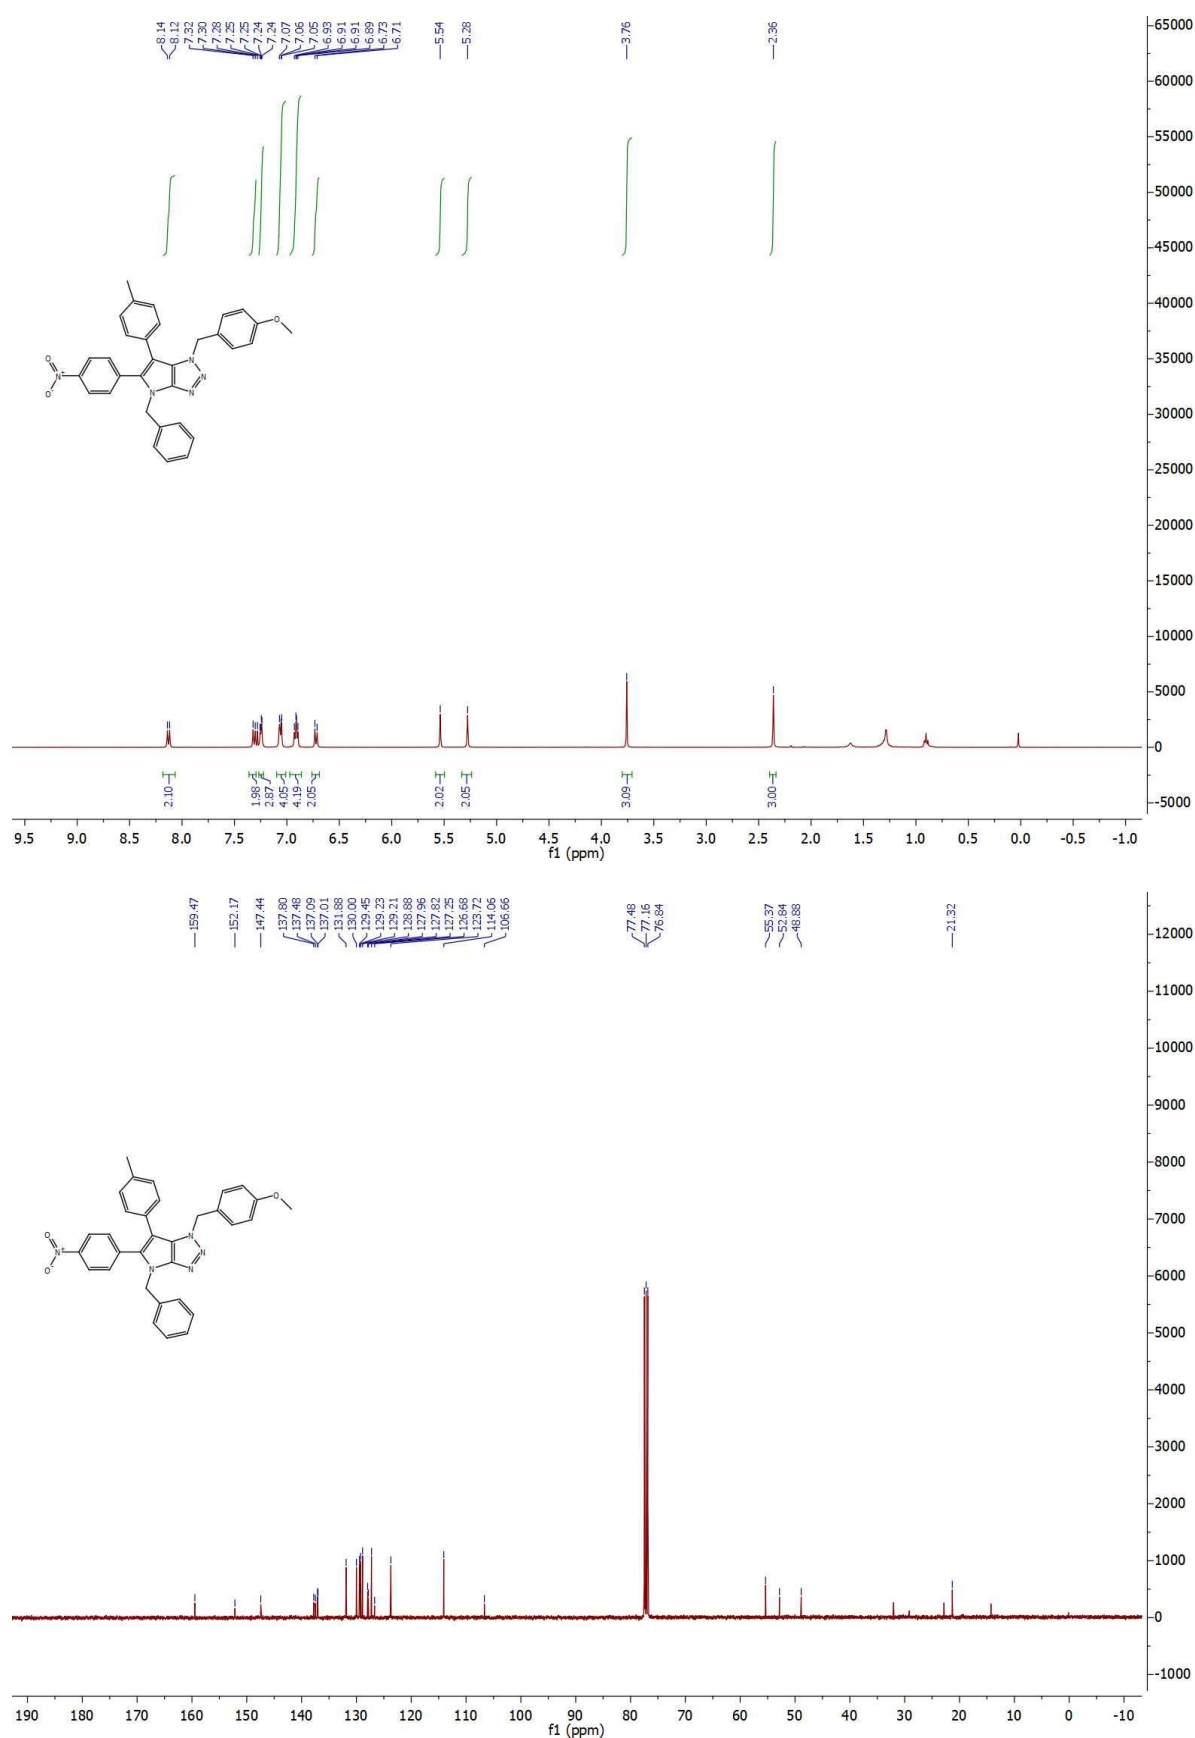

**Figure S41.** 4-(Benzyl-1-(4-methoxybenzyl)-5-(4-nitrophenyl)-6-(*p*-tolyl)-1,4-dihydropyrrolo[2,3-*d*][1,2,3]triazole (46).

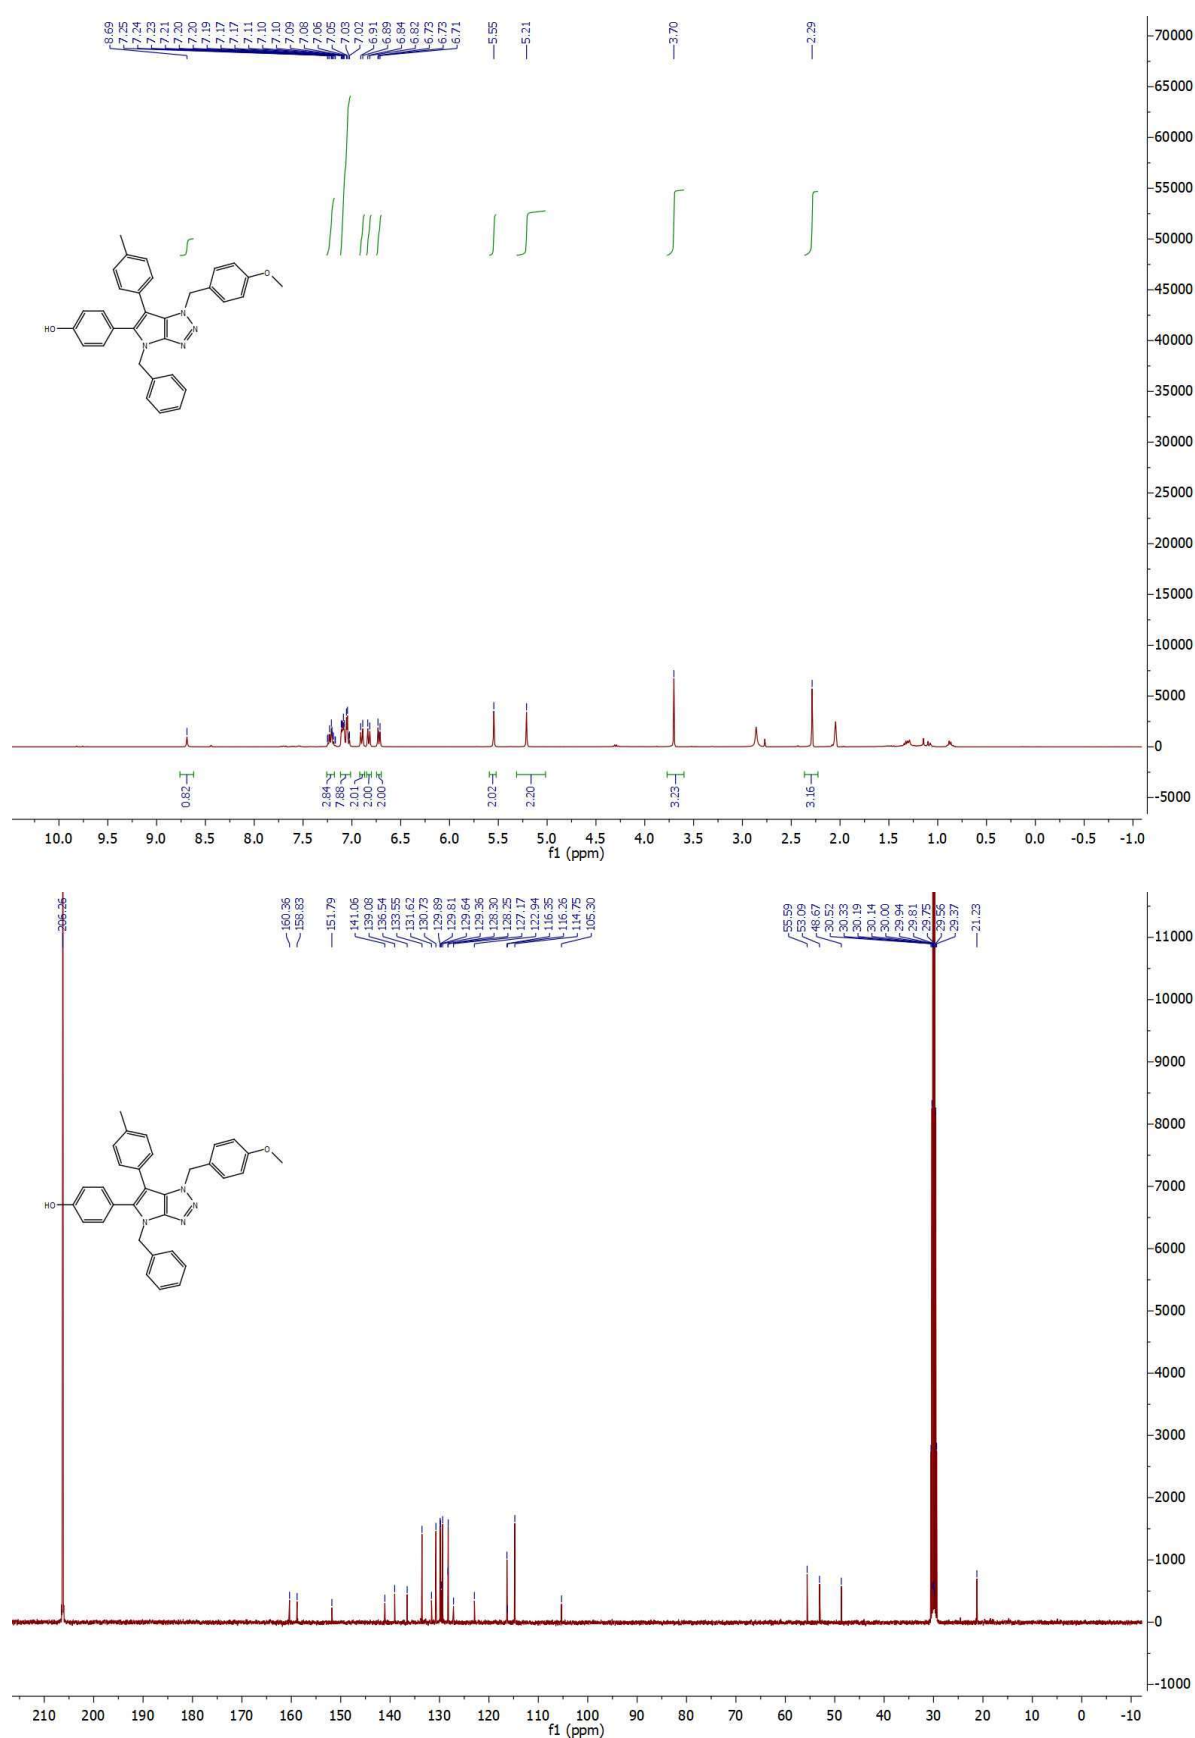

**Figure S42.** 4-(Benzyl-1-(4-methoxybenzyl)-6-(*p*-tolyl)-1,4-dihydropyrrolo[2,3-*d*][1,2,3]triazol-5-yl)phenol (47).

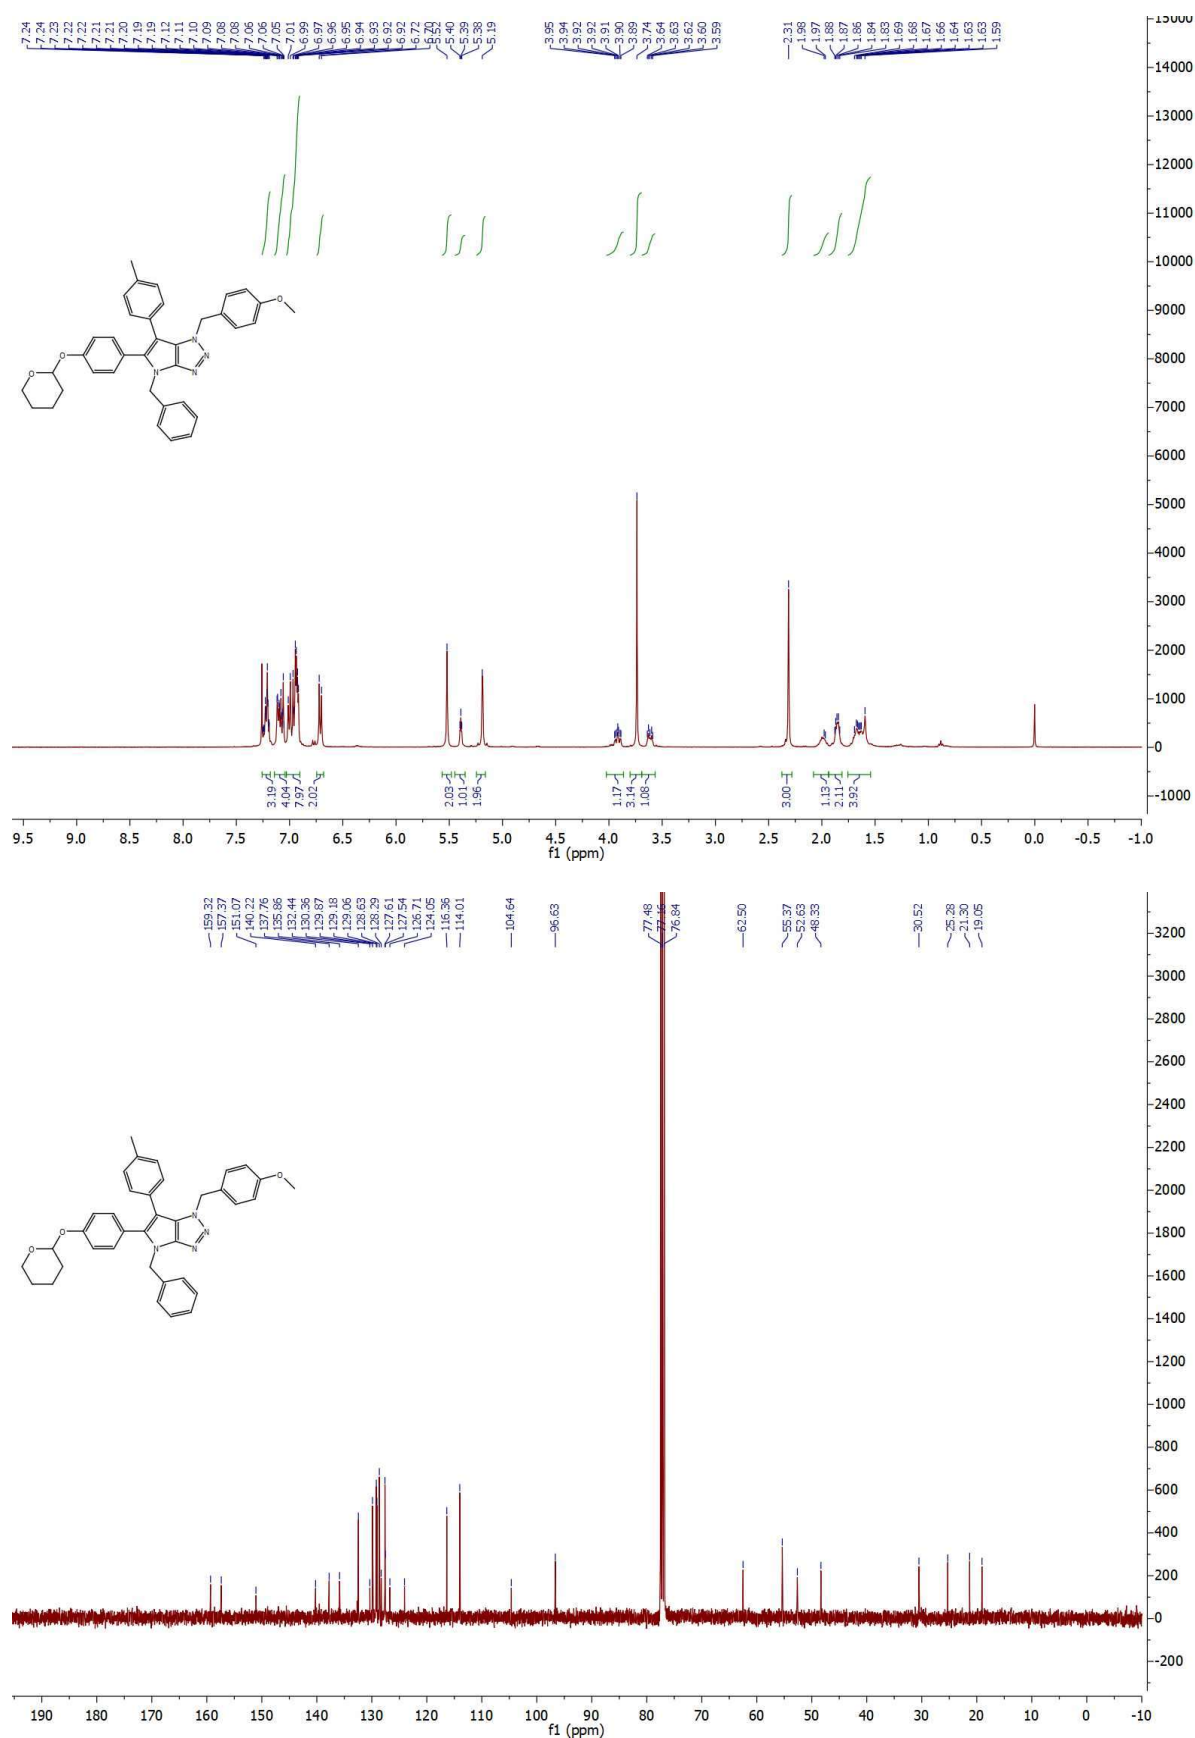

**Figure S43.** 4-Benzyl-1-(4-methoxybenzyl)-5-(4-((tetrahydro-2H-pyran-2-yl)oxy)phenyl)-6-(p-tolyl)-1,4-dihydropyrrolo[2,3-d][1,2,3]triazol-5-yl) (48).

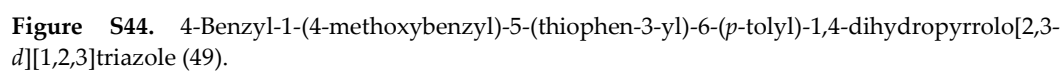

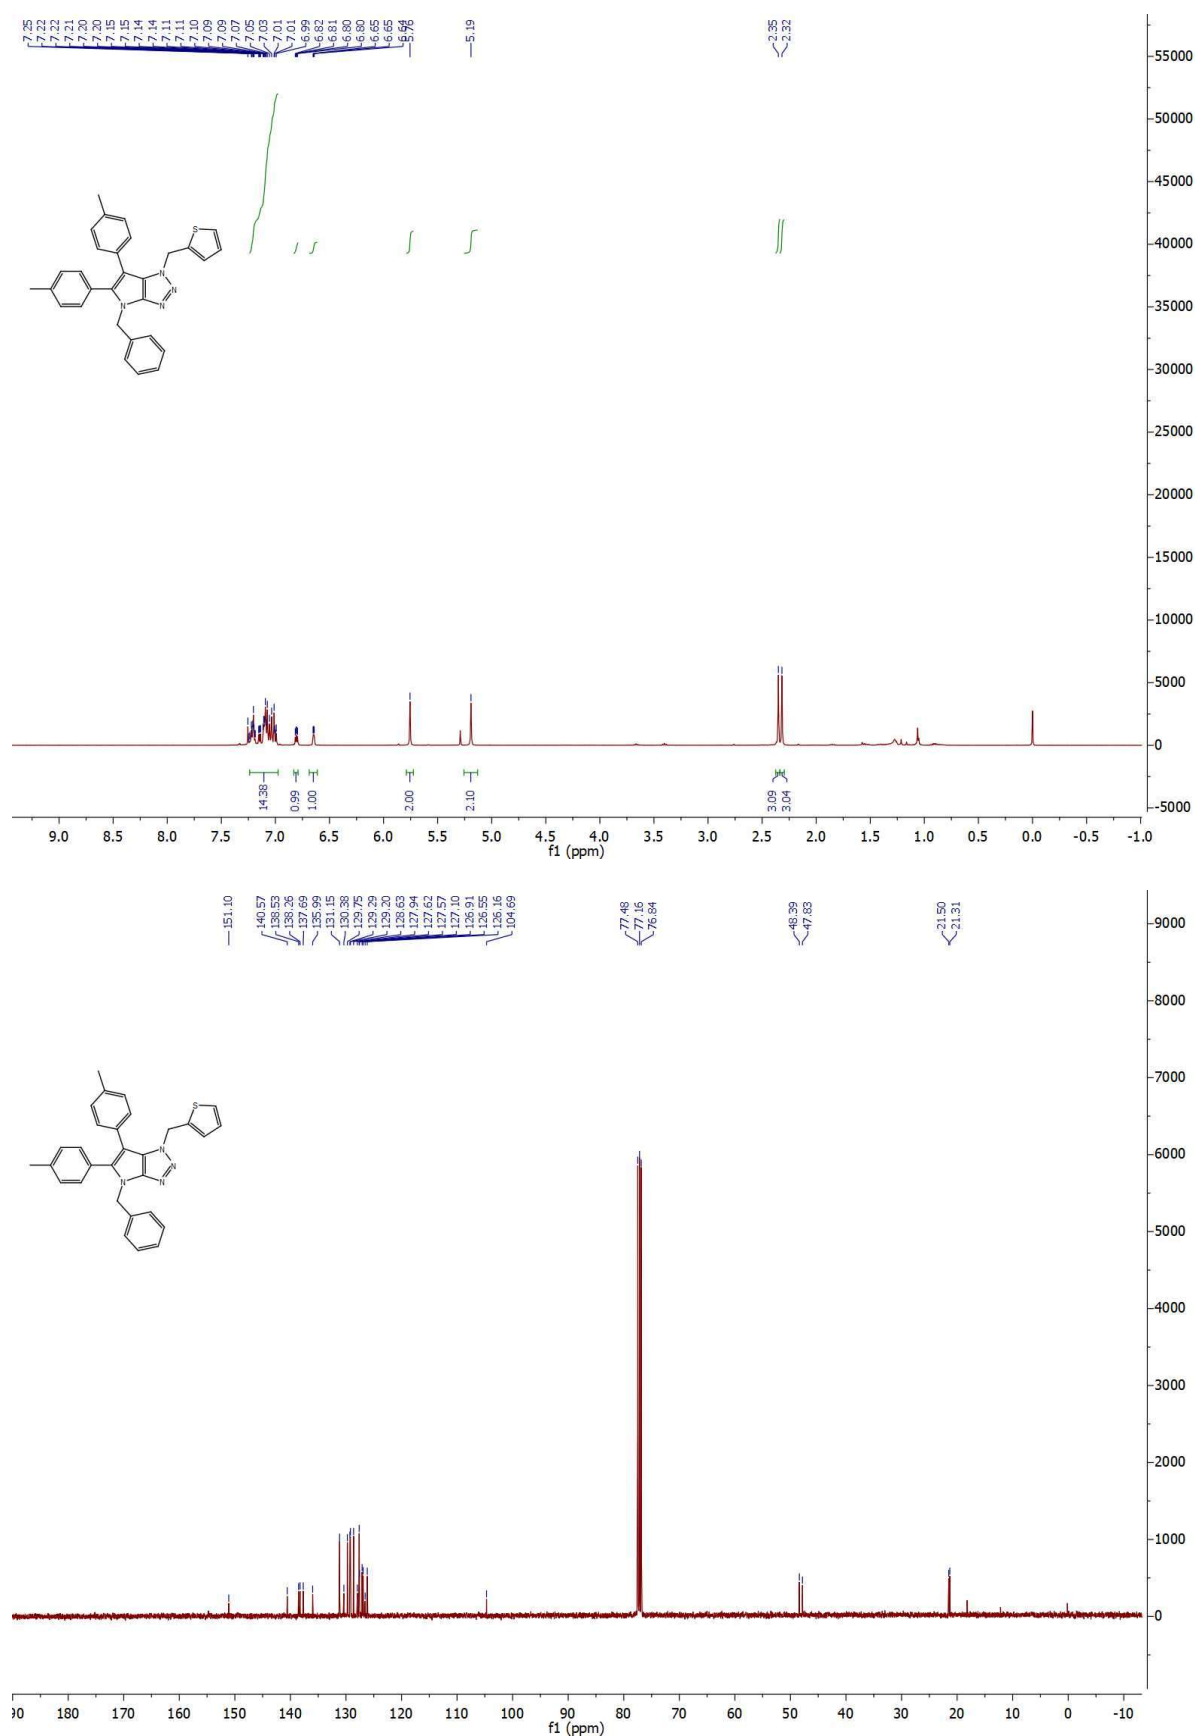

**Figure S45.** 4-Benzyl-1-(thiophen-2-ylmethyl)-5,6-di-*p*-tolyl-1,4-dihydropyrrolo[2,3-*d*][1,2,3]triazole (50).

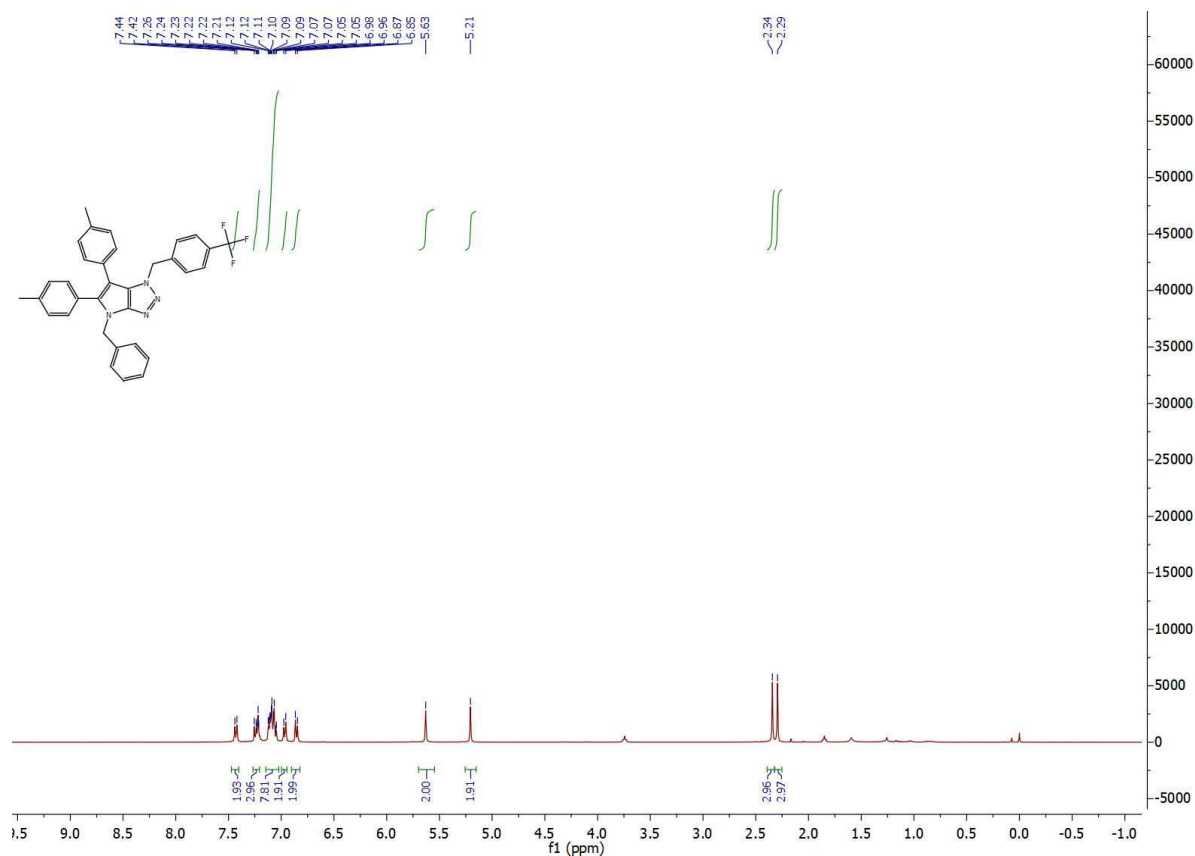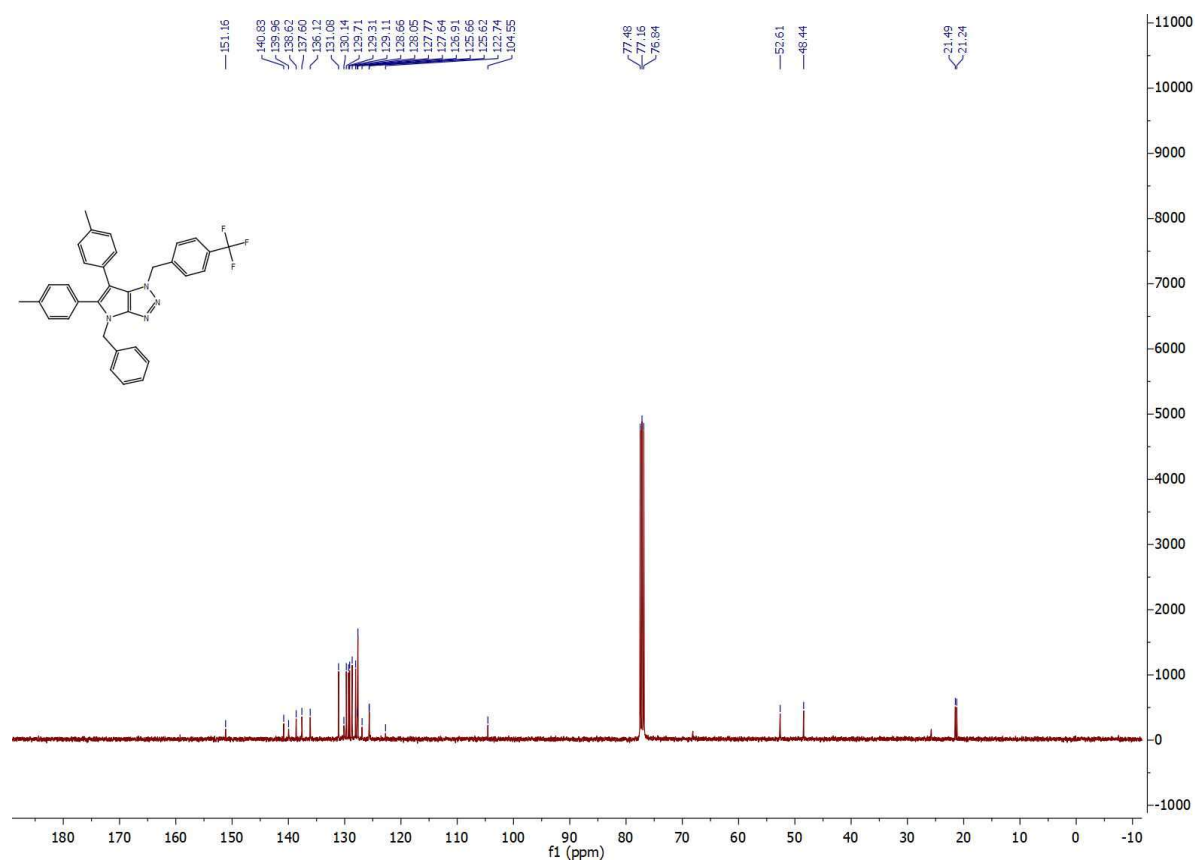

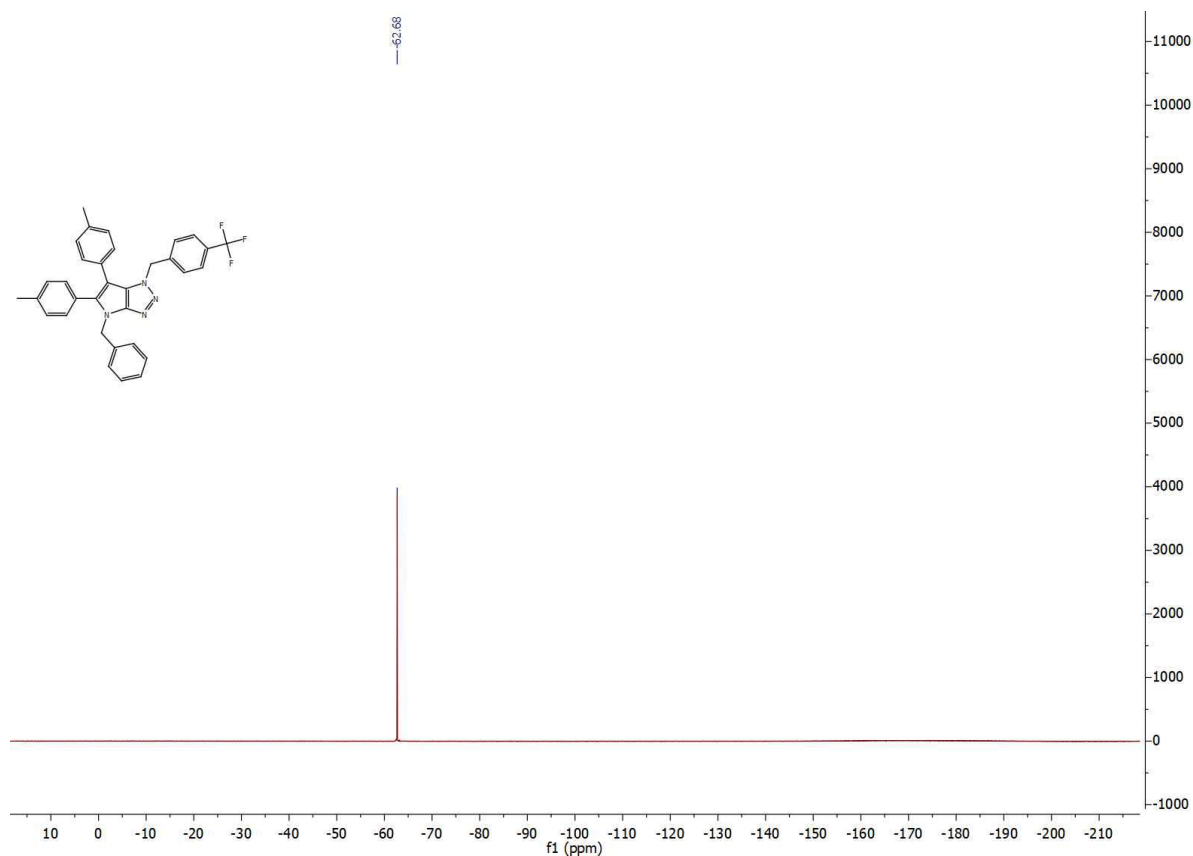

**Figure S46.** 4-Benzyl-5,6-di-*p*-tolyl-1-(4-(trifluoromethyl)benzyl)-1,4-dihydropyrrolo[2,3-*d*][1,2,3]triazole (51).

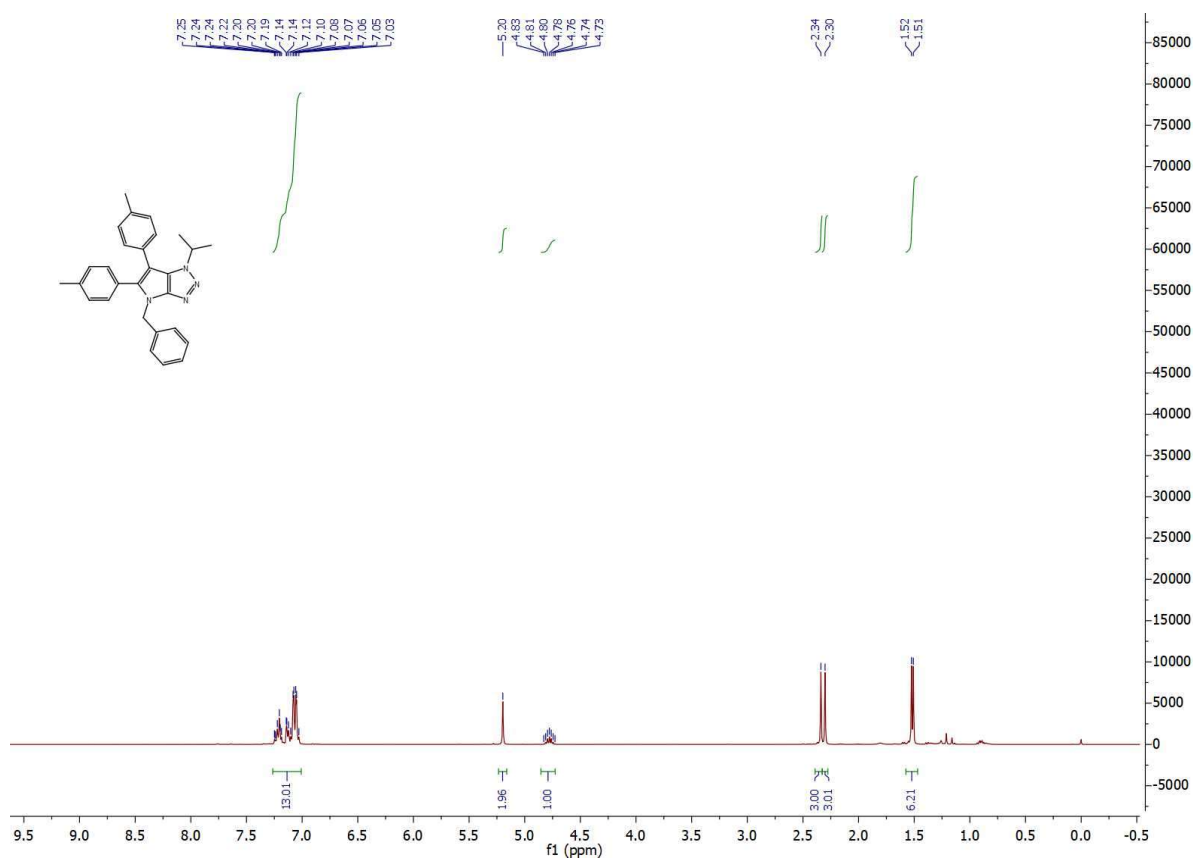

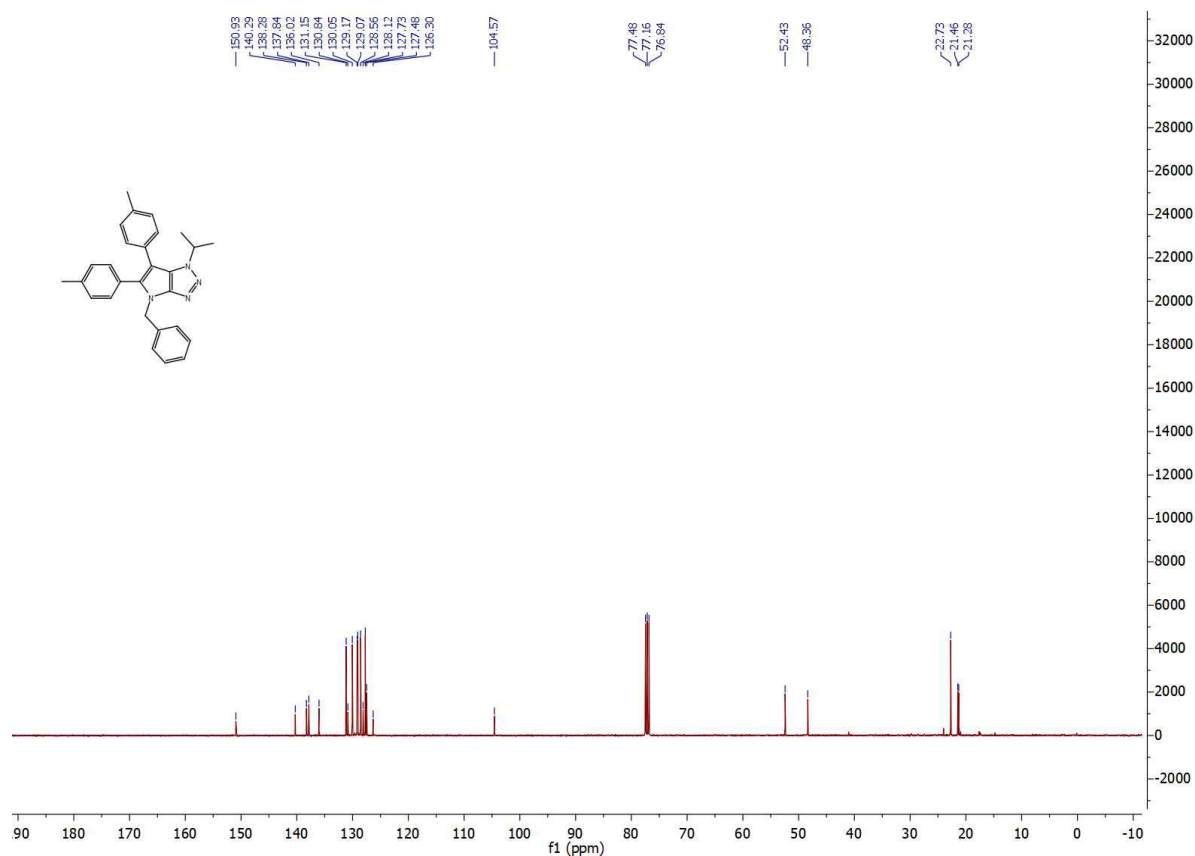

Figure S47. 4-Benzyl-1-isopropyl-5,6-di-*p*-tolyl-1,4-dihydropyrrolo[2,3-*d*][1,2,3]triazole (52).

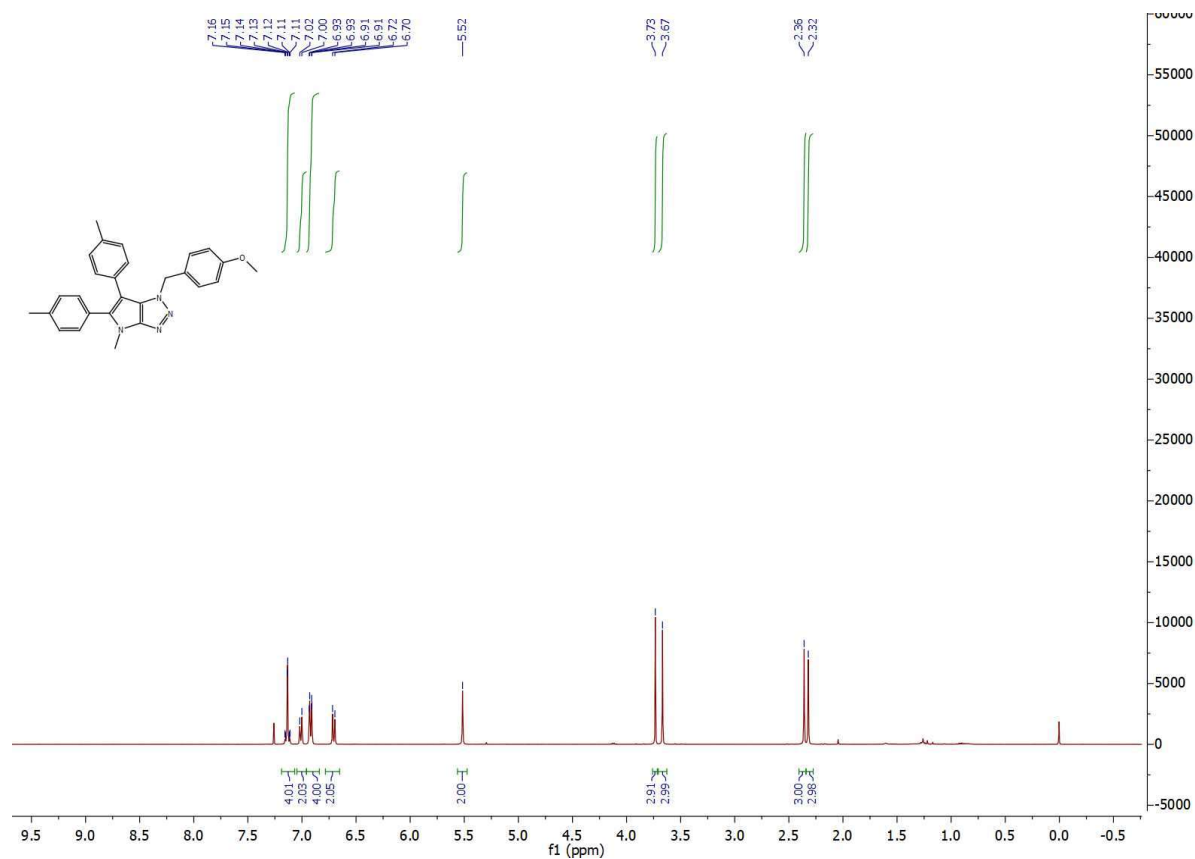

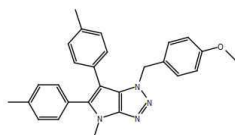

**Figure S48.** 1-(4-Methoxybenzyl)-4-methyl-5,6-di-*p*-tolyl-1,4-dihydropyrrolo[2,3-*d*][1,2,3]triazole (53).

**Table S1.** Crystal data and structure refinement for 41.

|                                    |                                                  |
|------------------------------------|--------------------------------------------------|
| Identification code                | SG450                                            |
| Empirical formula                  | C <sub>33</sub> H <sub>30</sub> N <sub>4</sub> O |
| Formula weight                     | 498.61                                           |
| Temperature/K                      | 296.15                                           |
| Crystal system                     | monoclinic                                       |
| Space group                        | P2 <sub>1</sub> /c                               |
| a/Å                                | 17.973(4)                                        |
| b/Å                                | 6.0142(9)                                        |
| c/Å                                | 24.901(5)                                        |
| α/°                                | 90                                               |
| β/°                                | 96.422(16)                                       |
| γ/°                                | 90                                               |
| Volume/Å <sup>3</sup>              | 2674.8(9)                                        |
| Z                                  | 4                                                |
| ρ <sub>calc</sub> /cm <sup>3</sup> | 1.238                                            |
| μ/mm <sup>-1</sup>                 | 0.076                                            |
| F(000)                             | 1056.0                                           |
| Crystal size/mm <sup>3</sup>       | 0.32 × 0.12 × 0.12                               |
| Radiation                          | MoKα (λ = 0.71073)                               |
| 2Θ range for data collection/°     | 2.28 to 52.744                                   |
| Index ranges                       | -22 ≤ h ≤ 22, -7 ≤ k ≤ 7, -31 ≤ l ≤ 31           |
| Reflections collected              | 64723                                            |

|                                                |                                                                  |
|------------------------------------------------|------------------------------------------------------------------|
| Independent reflections                        | 5440 [ $R_{\text{int}} = 0.0526$ , $R_{\text{sigma}} = 0.0219$ ] |
| Data/restraints/parameters                     | 5440/0/357                                                       |
| Goodness-of-fit on $F^2$                       | 1.025                                                            |
| Final R indexes [ $I \geq 2\sigma(I)$ ]        | $R_1 = 0.0463$ , $wR_2 = 0.1163$                                 |
| Final R indexes [all data]                     | $R_1 = 0.0642$ , $wR_2 = 0.1280$                                 |
| Largest diff. peak/hole / $e \text{ \AA}^{-3}$ | 0.17/−0.15                                                       |

Table S2. Bond Lengths for 41.

| Atom | Atom | Length/Å   | Atom | Atom | Length/Å |
|------|------|------------|------|------|----------|
| O1   | C1   | 1.371(2)   | C28  | C29  | 1.375(2) |
| O1   | C7   | 1.415(3)   | C5   | C6   | 1.384(2) |
| N4   | C12  | 1.3906(19) | C14  | C15  | 1.385(2) |
| N4   | C9   | 1.3738(19) | C10  | C9   | 1.366(2) |
| N4   | C27  | 1.4497(19) | C3   | C2   | 1.375(2) |
| N1   | N2   | 1.3712(19) | C20  | C25  | 1.390(2) |
| N1   | C10  | 1.3665(18) | C20  | C21  | 1.378(2) |
| N1   | C8   | 1.451(2)   | C15  | C16  | 1.383(2) |
| N3   | N2   | 1.326(2)   | C16  | C17  | 1.388(2) |
| N3   | C9   | 1.350(2)   | C16  | C19  | 1.504(2) |
| C4   | C5   | 1.383(2)   | C2   | C1   | 1.382(2) |
| C4   | C3   | 1.382(2)   | C33  | C32  | 1.389(2) |
| C4   | C8   | 1.509(2)   | C1   | C6   | 1.379(2) |
| C13  | C11  | 1.473(2)   | C25  | C24  | 1.379(3) |
| C13  | C18  | 1.397(2)   | C32  | C31  | 1.357(3) |
| C13  | C14  | 1.392(2)   | C29  | C30  | 1.380(3) |
| C11  | C12  | 1.3932(19) | C21  | C22  | 1.380(3) |
| C11  | C10  | 1.433(2)   | C31  | C30  | 1.360(3) |
| C12  | C20  | 1.484(2)   | C24  | C23  | 1.387(4) |
| C18  | C17  | 1.377(2)   | C24  | C26B | 1.622(5) |
| C28  | C33  | 1.376(2)   | C23  | C22  | 1.385(4) |
| C28  | C27  | 1.510(2)   | C22  | C26A | 1.620(7) |
